# Supplementary material for: High-throughput comparison of gene fitness among related bacteria
Source: PubMed Central journal article supplement (PMC3487940; doi:10.1186/1471-2164-13-212), 2012-05-30

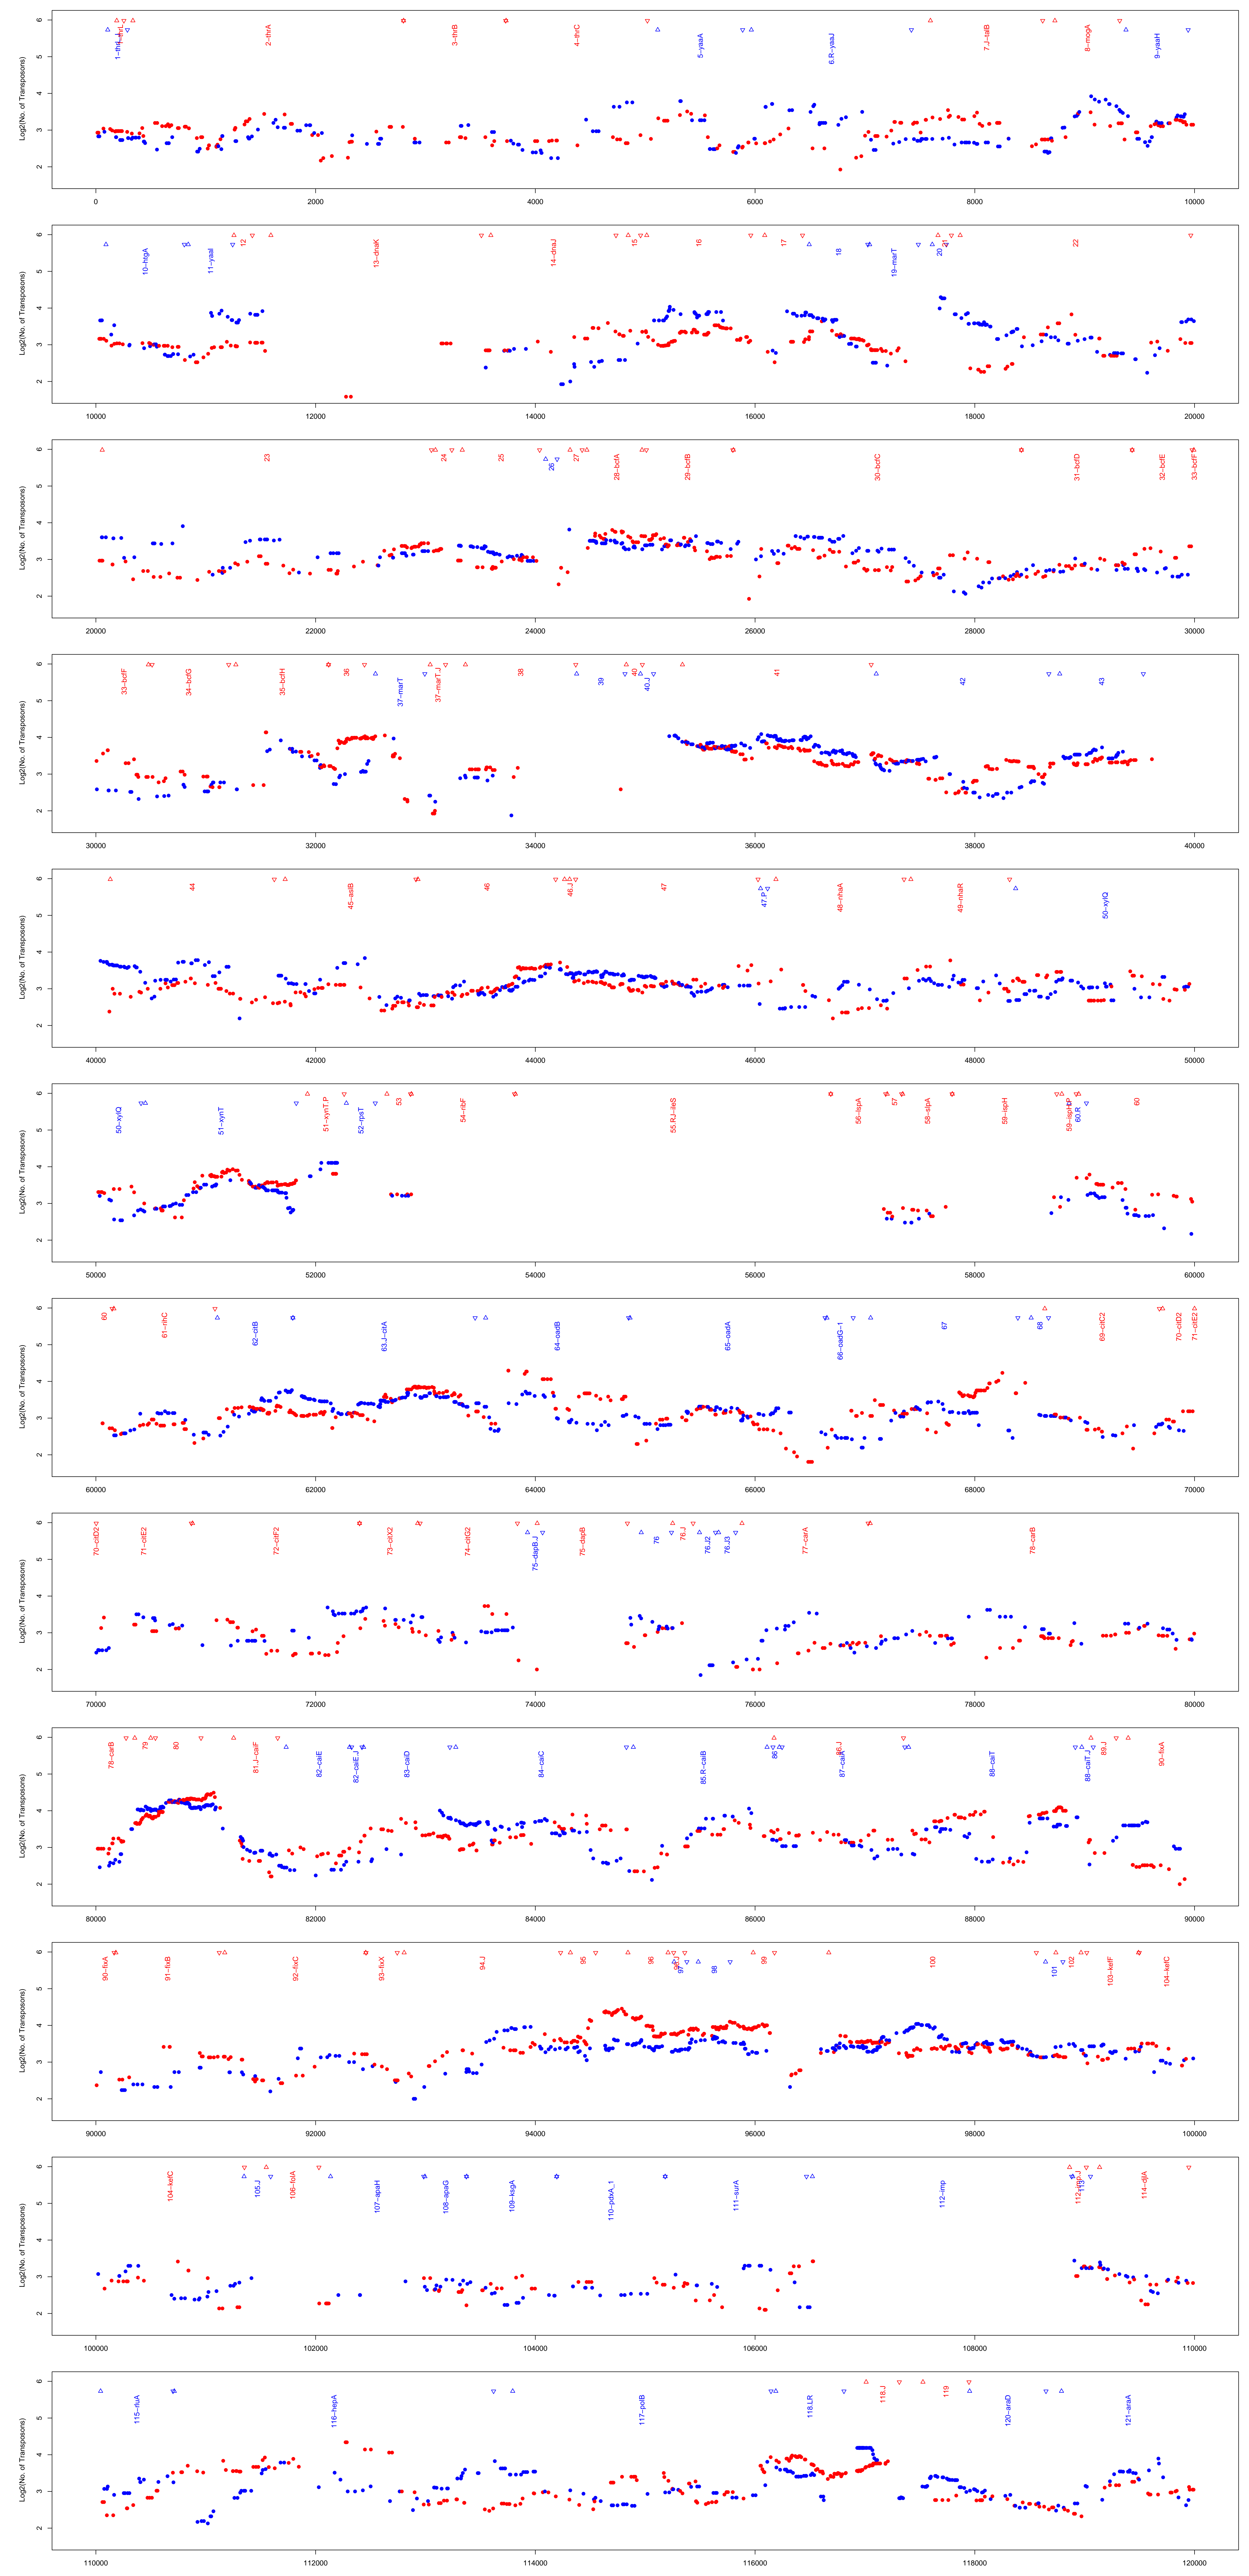

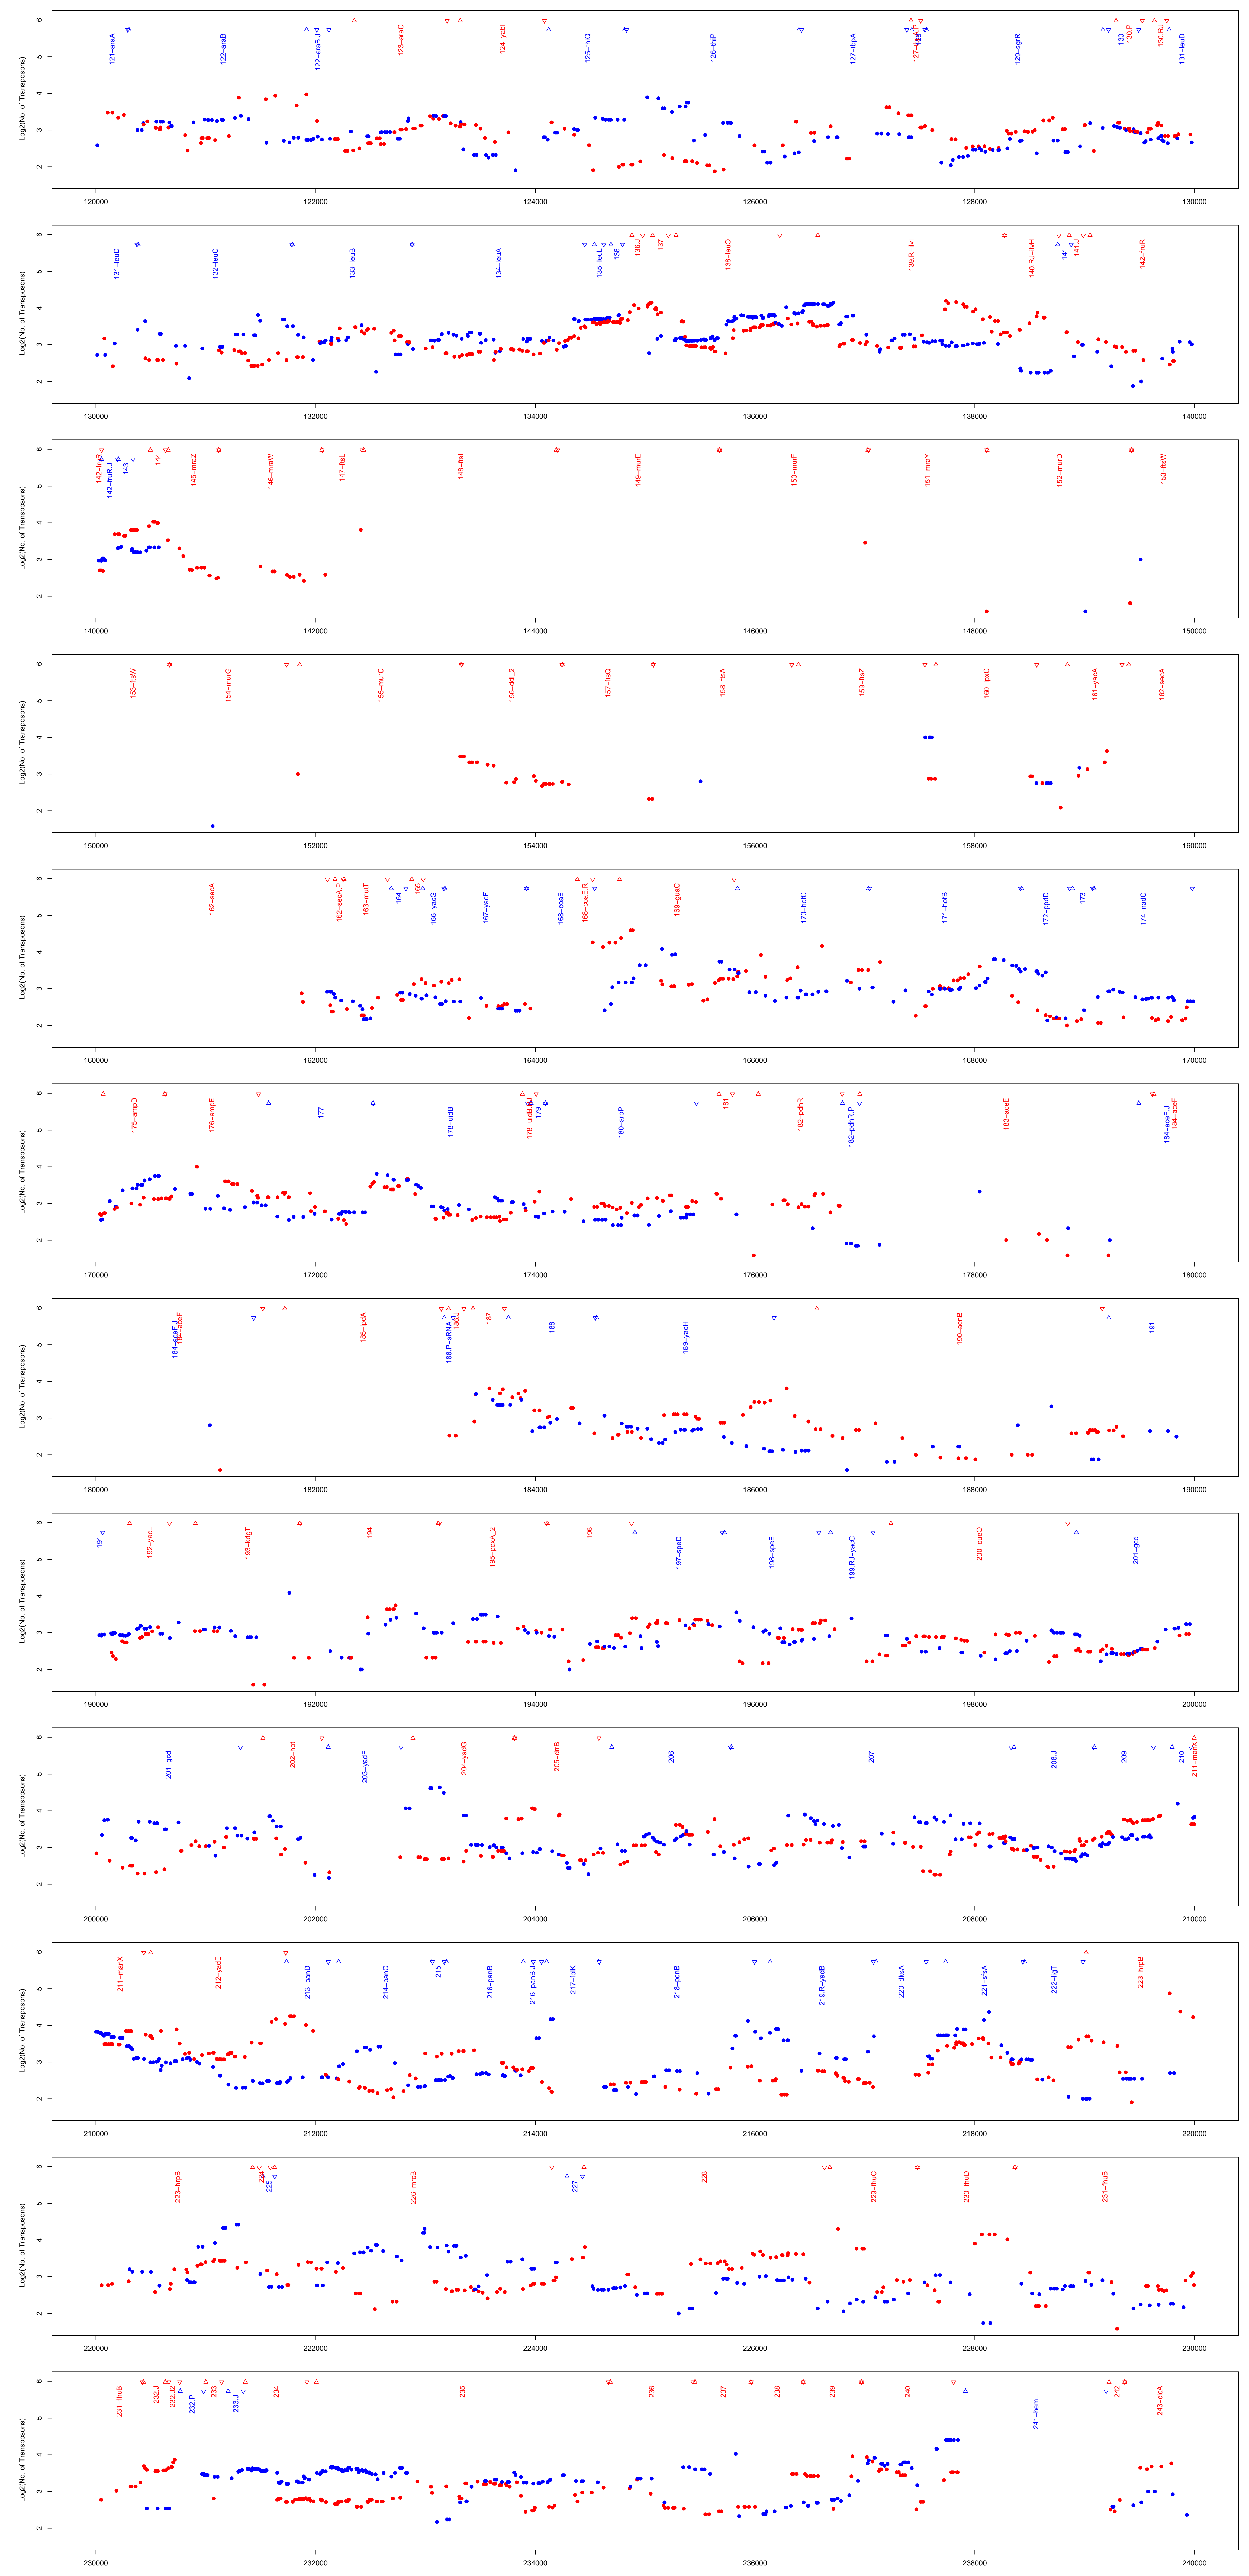

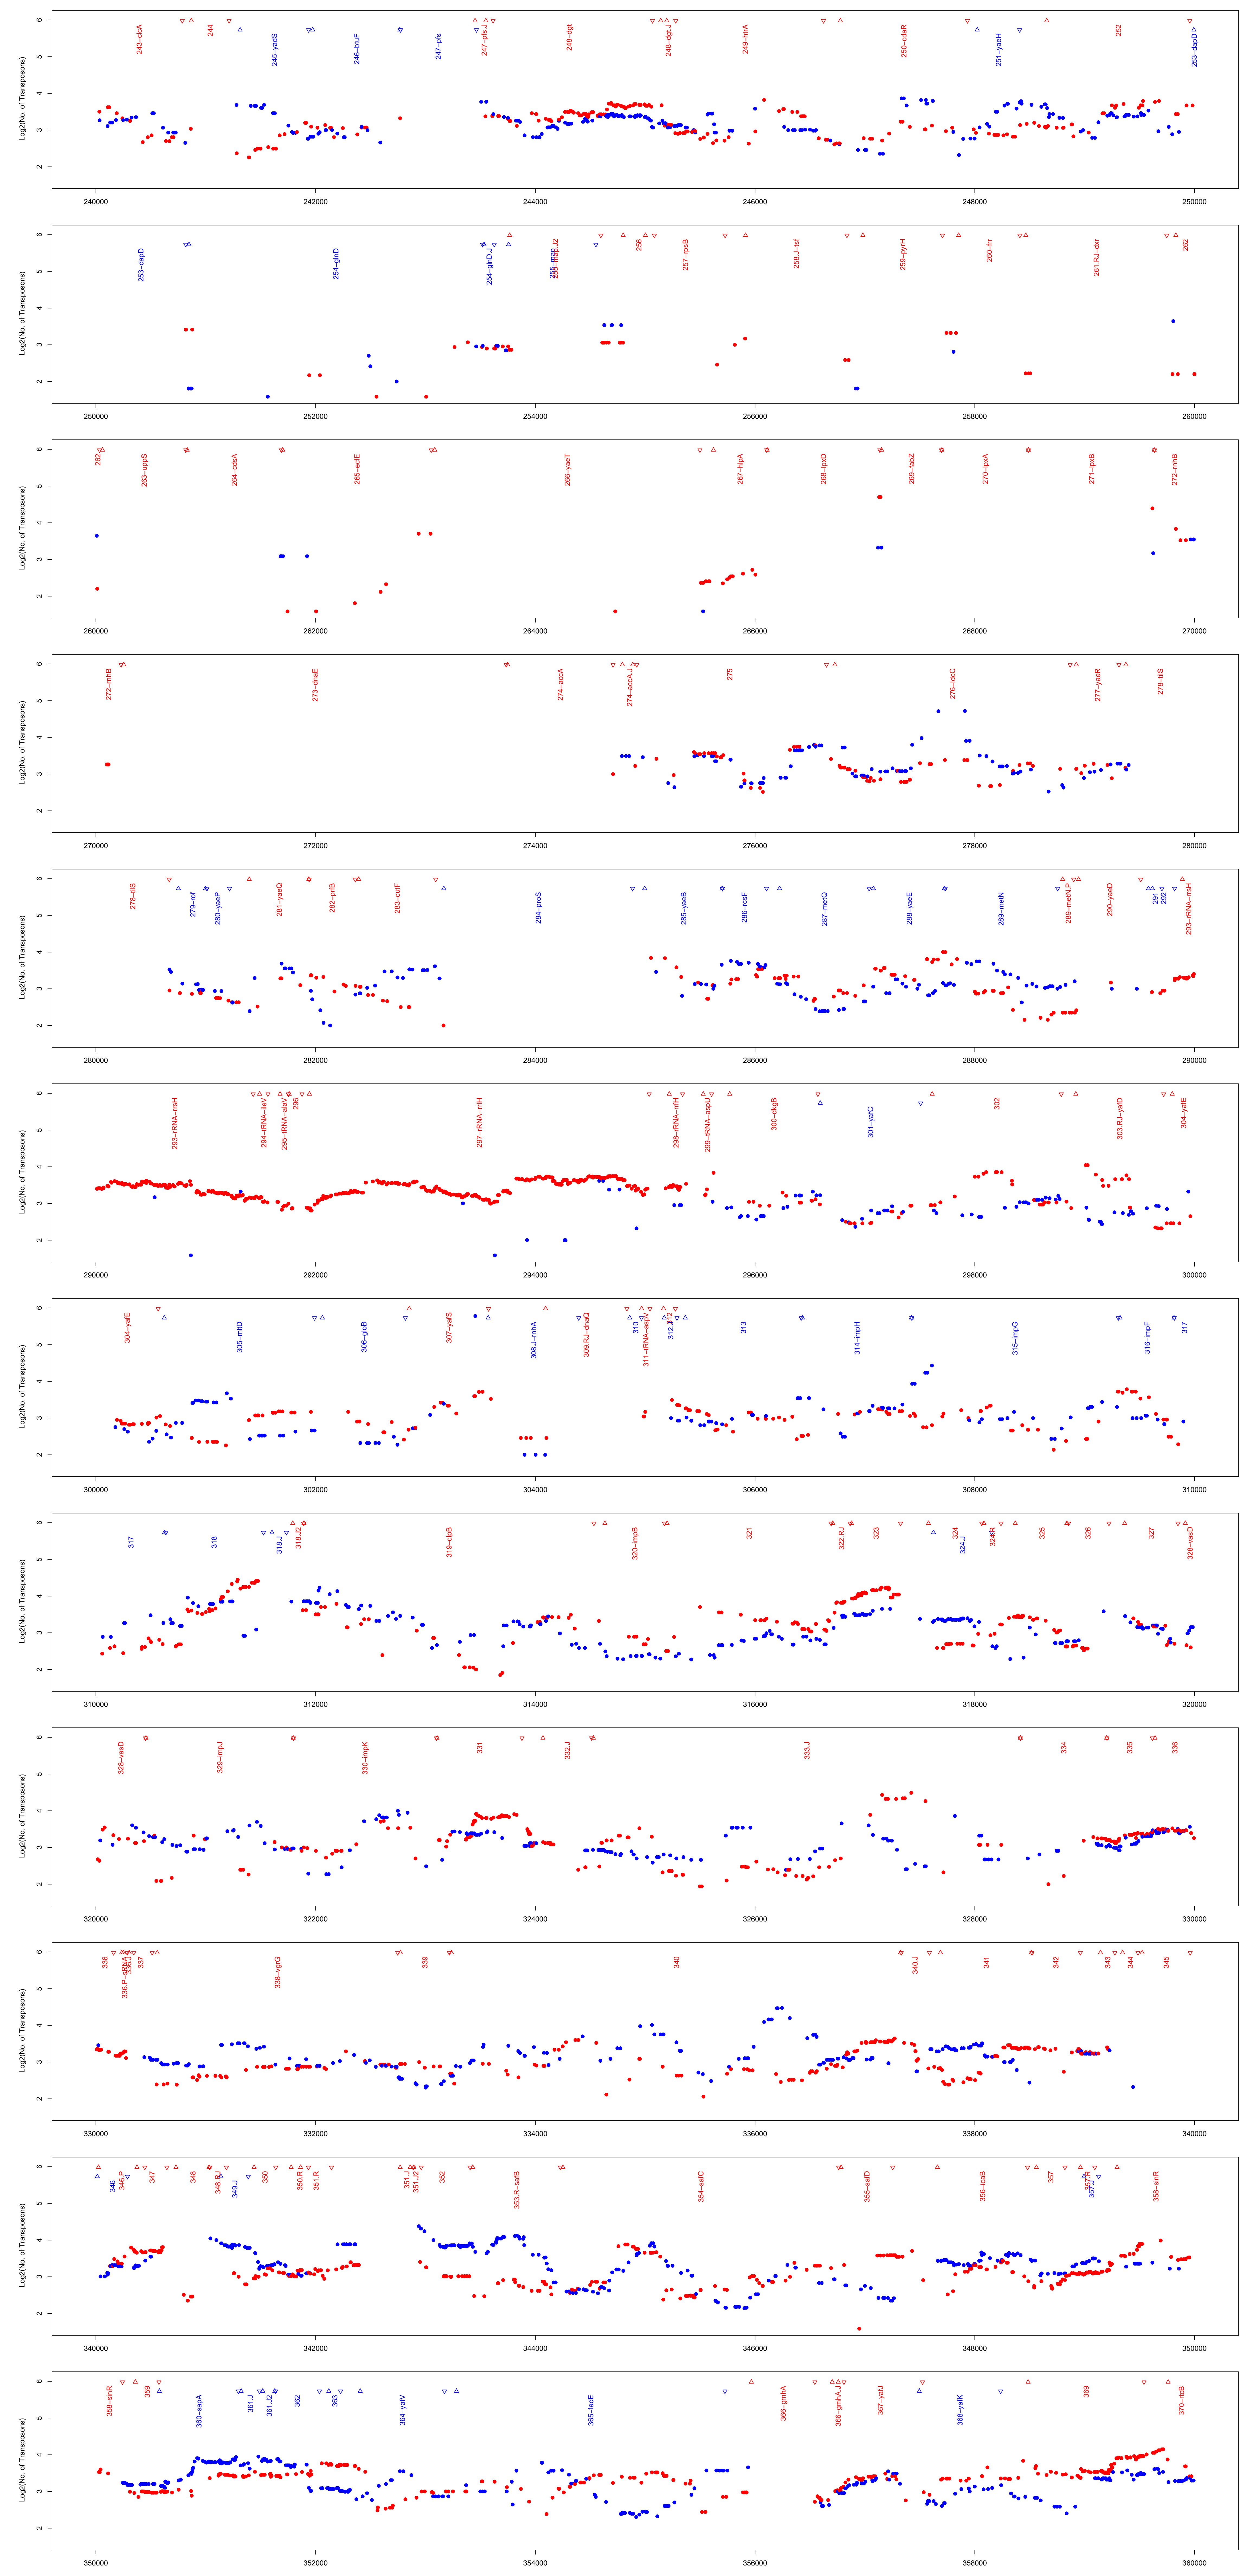

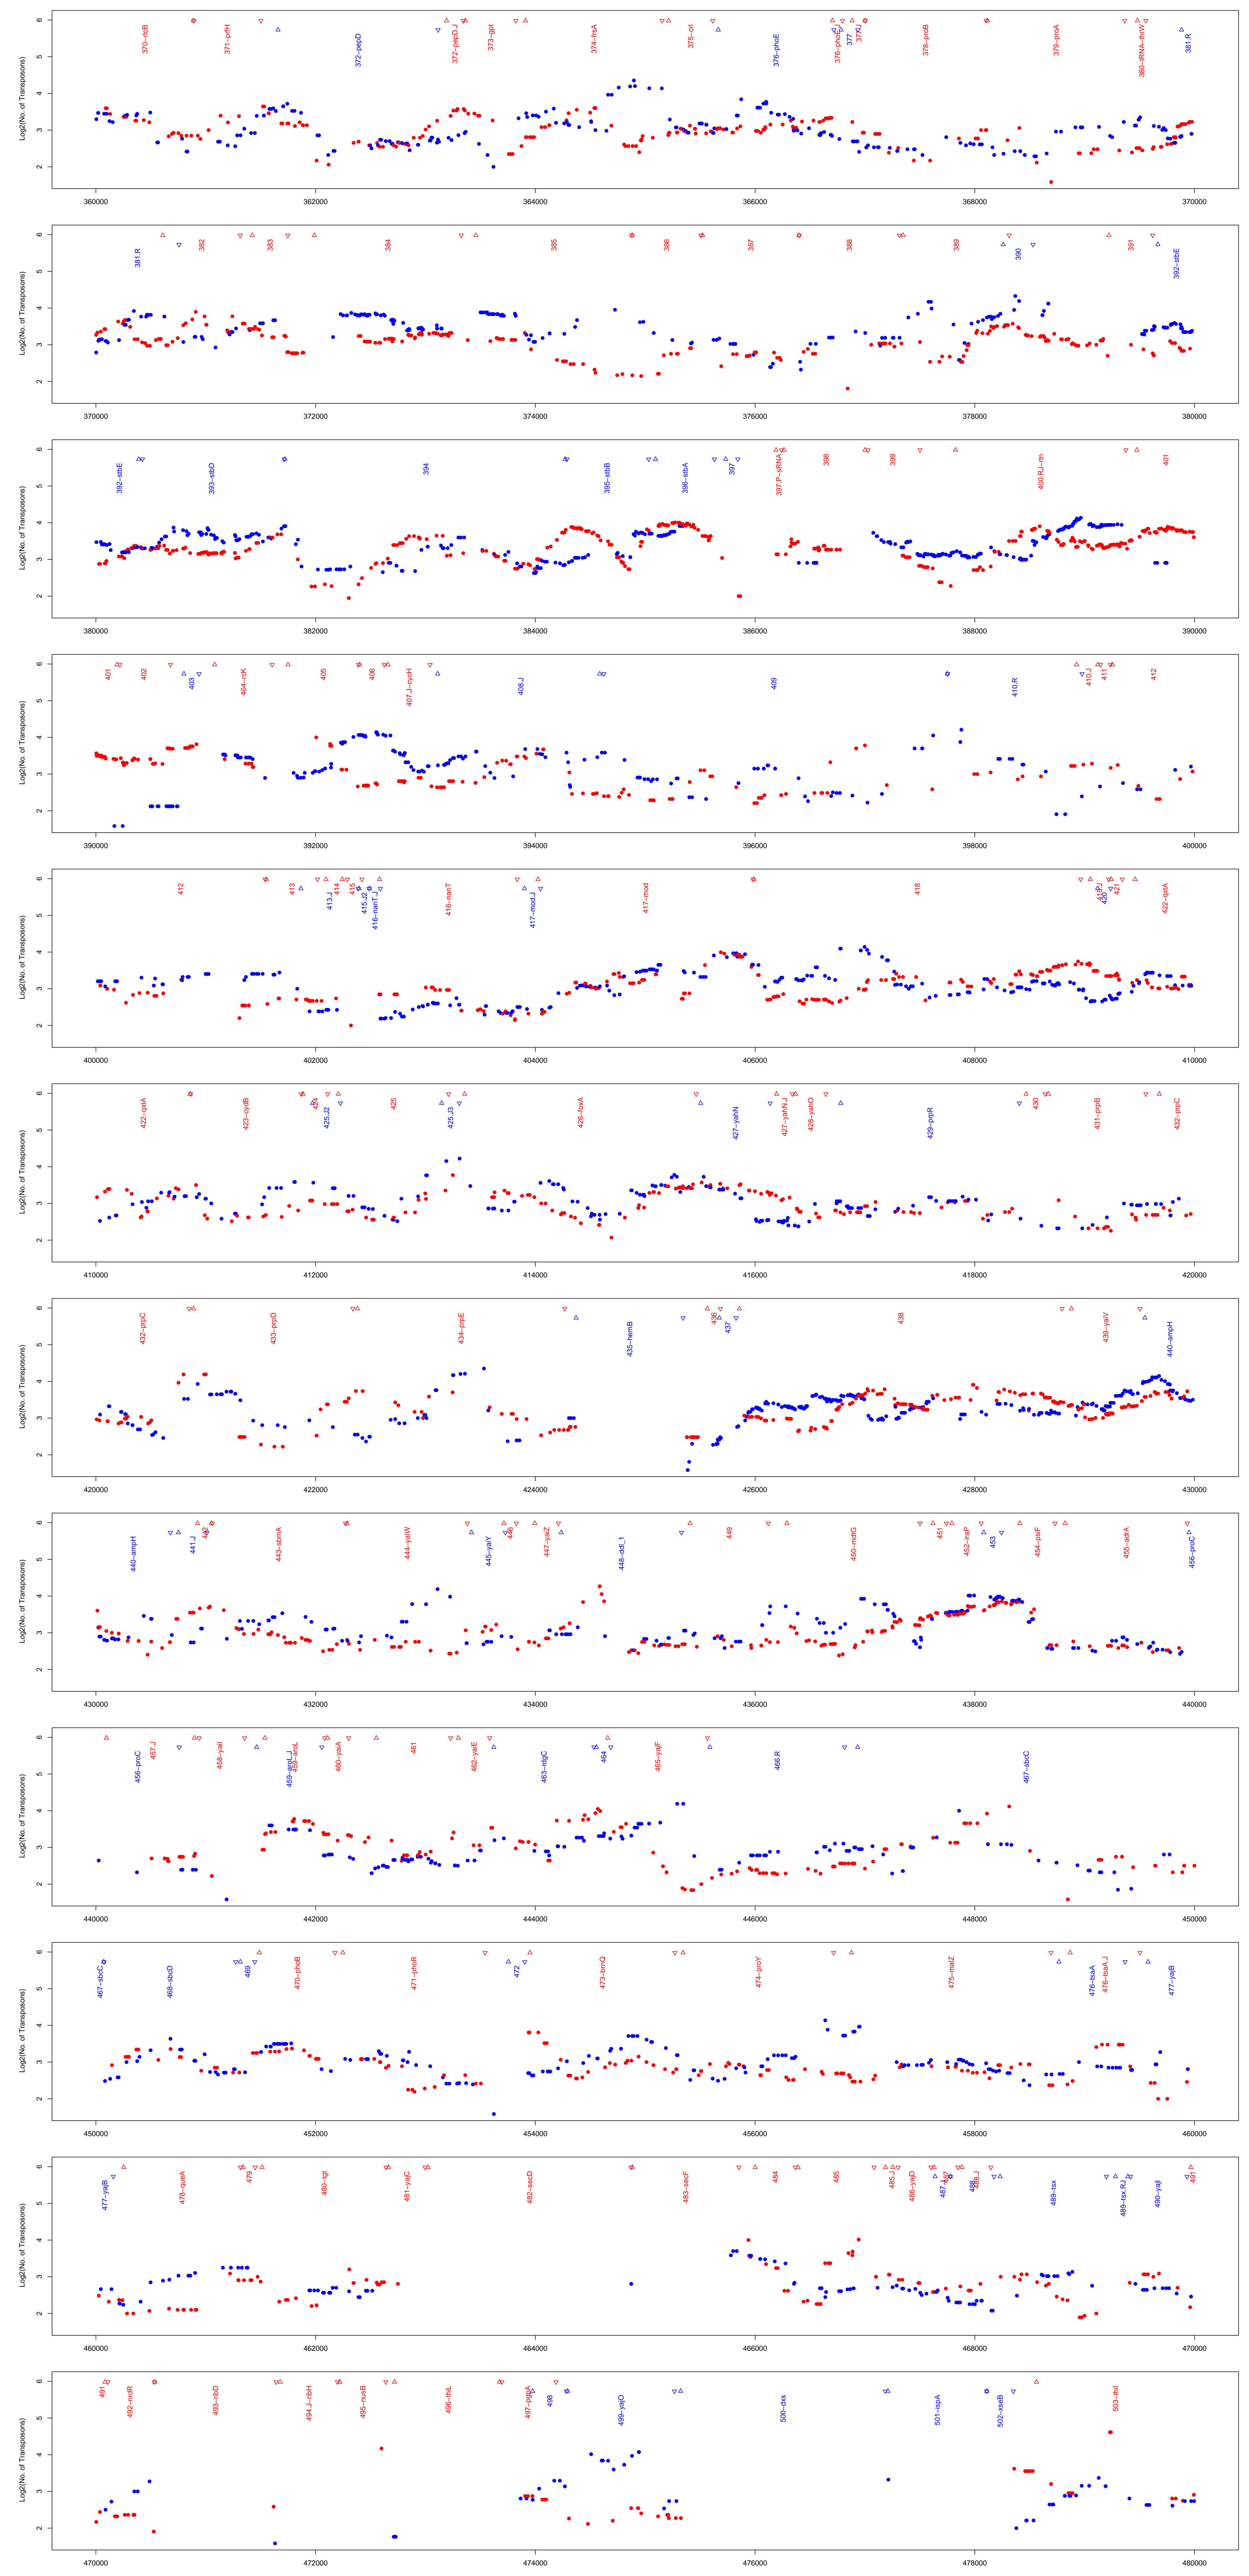

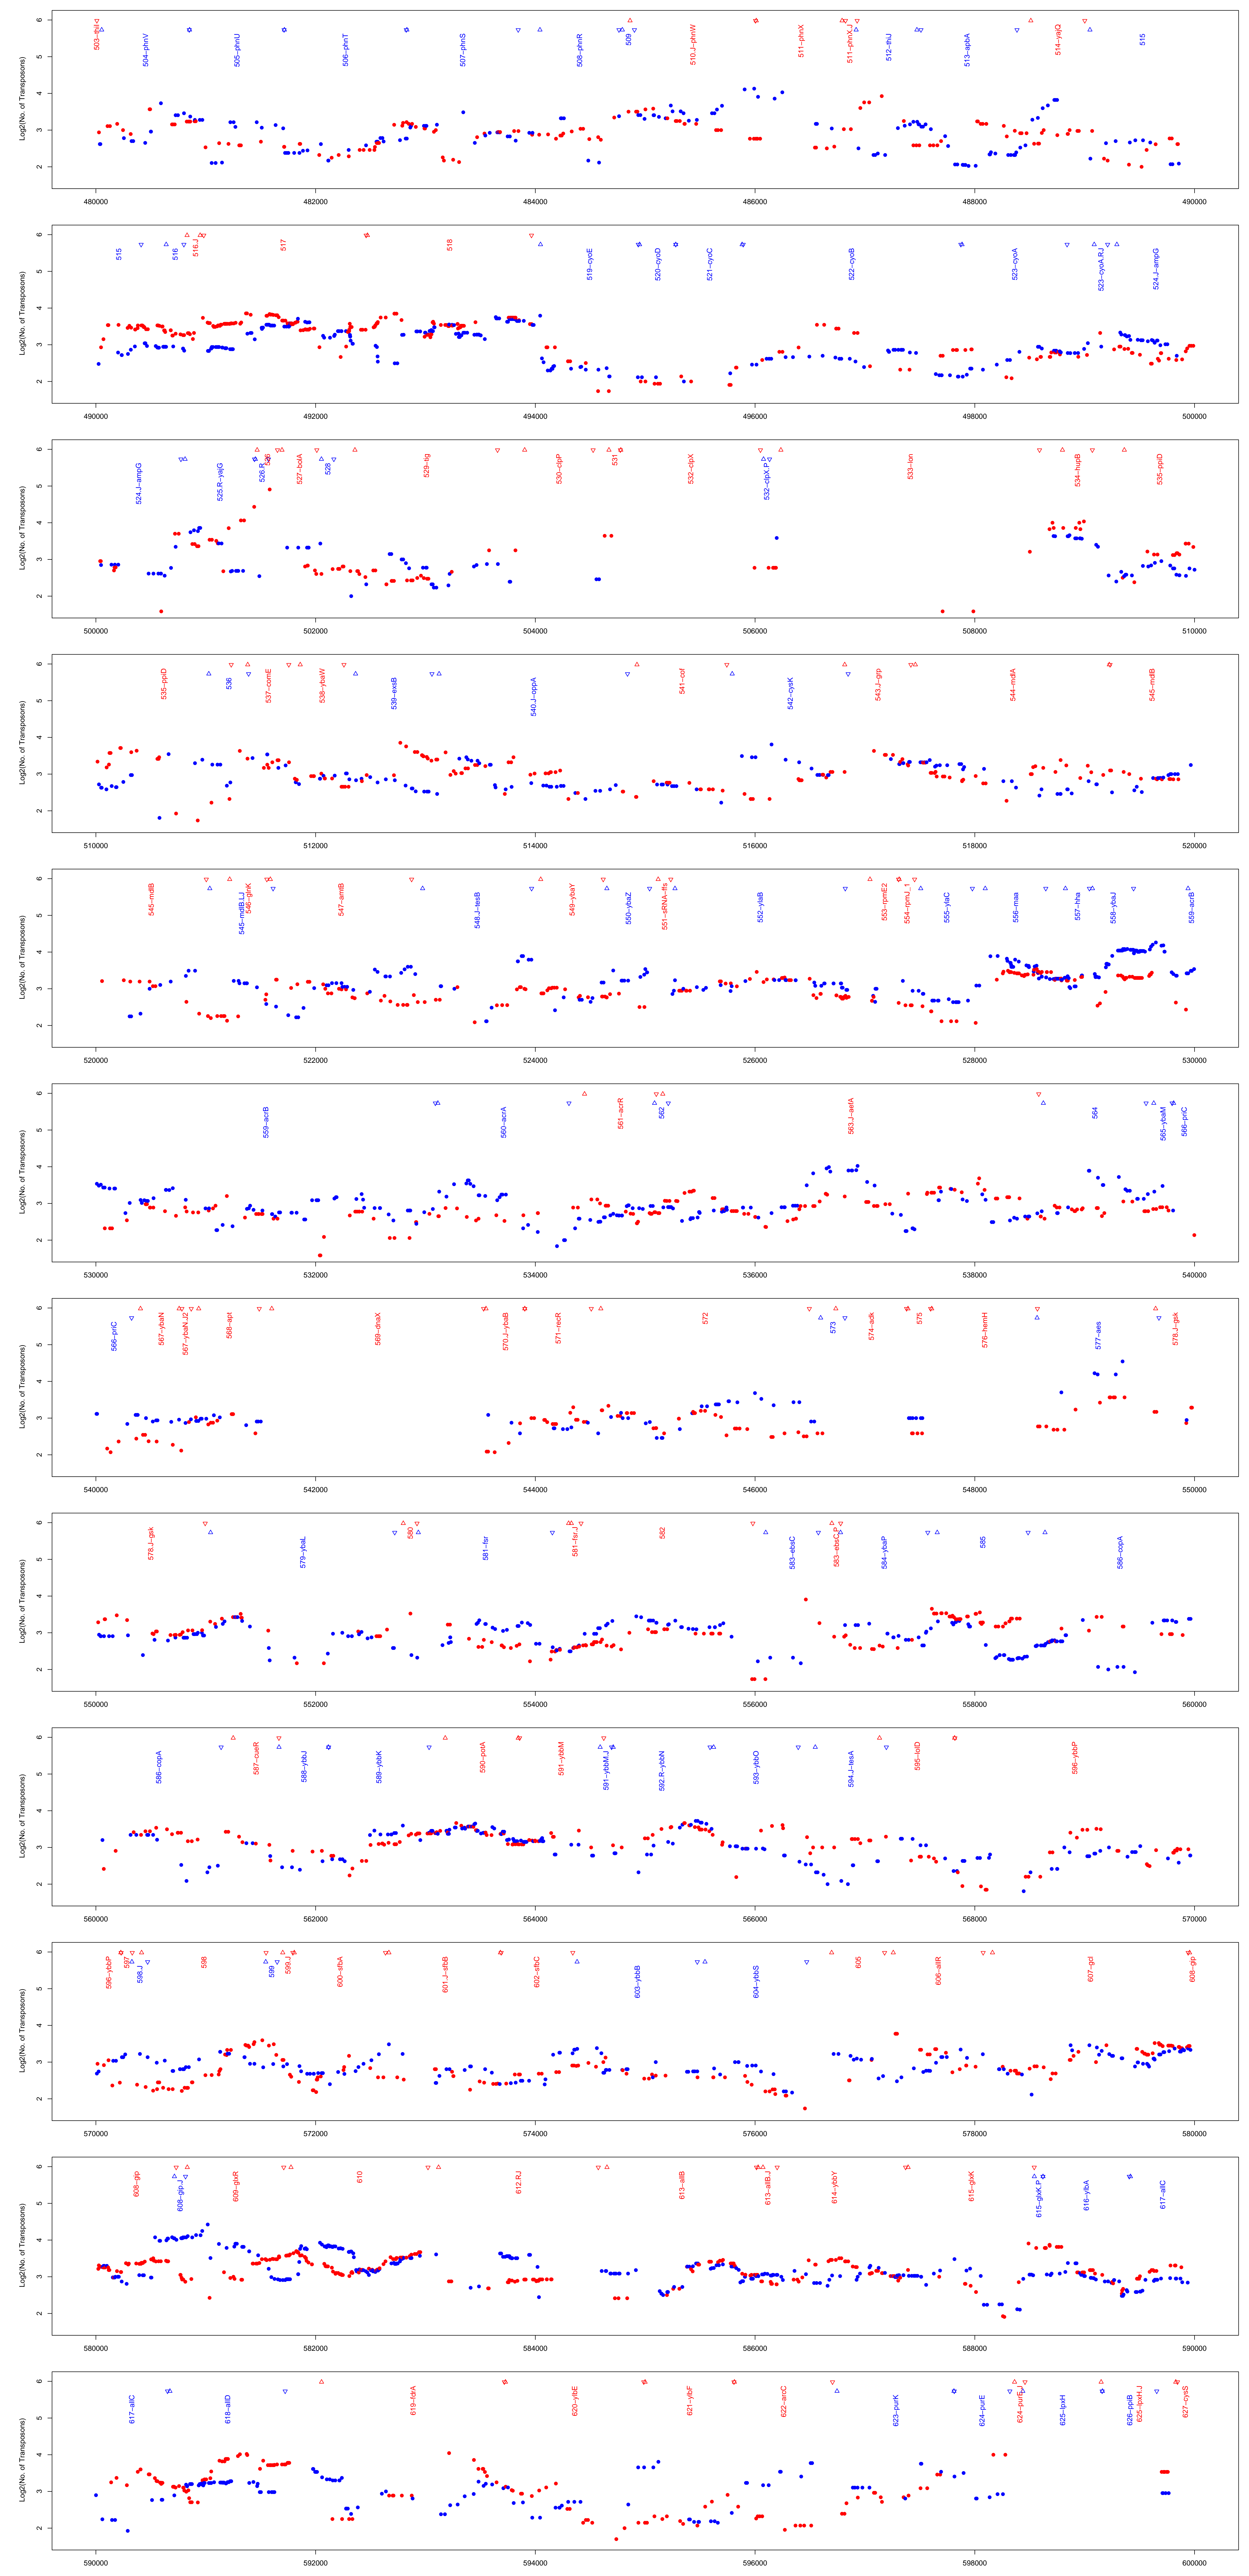

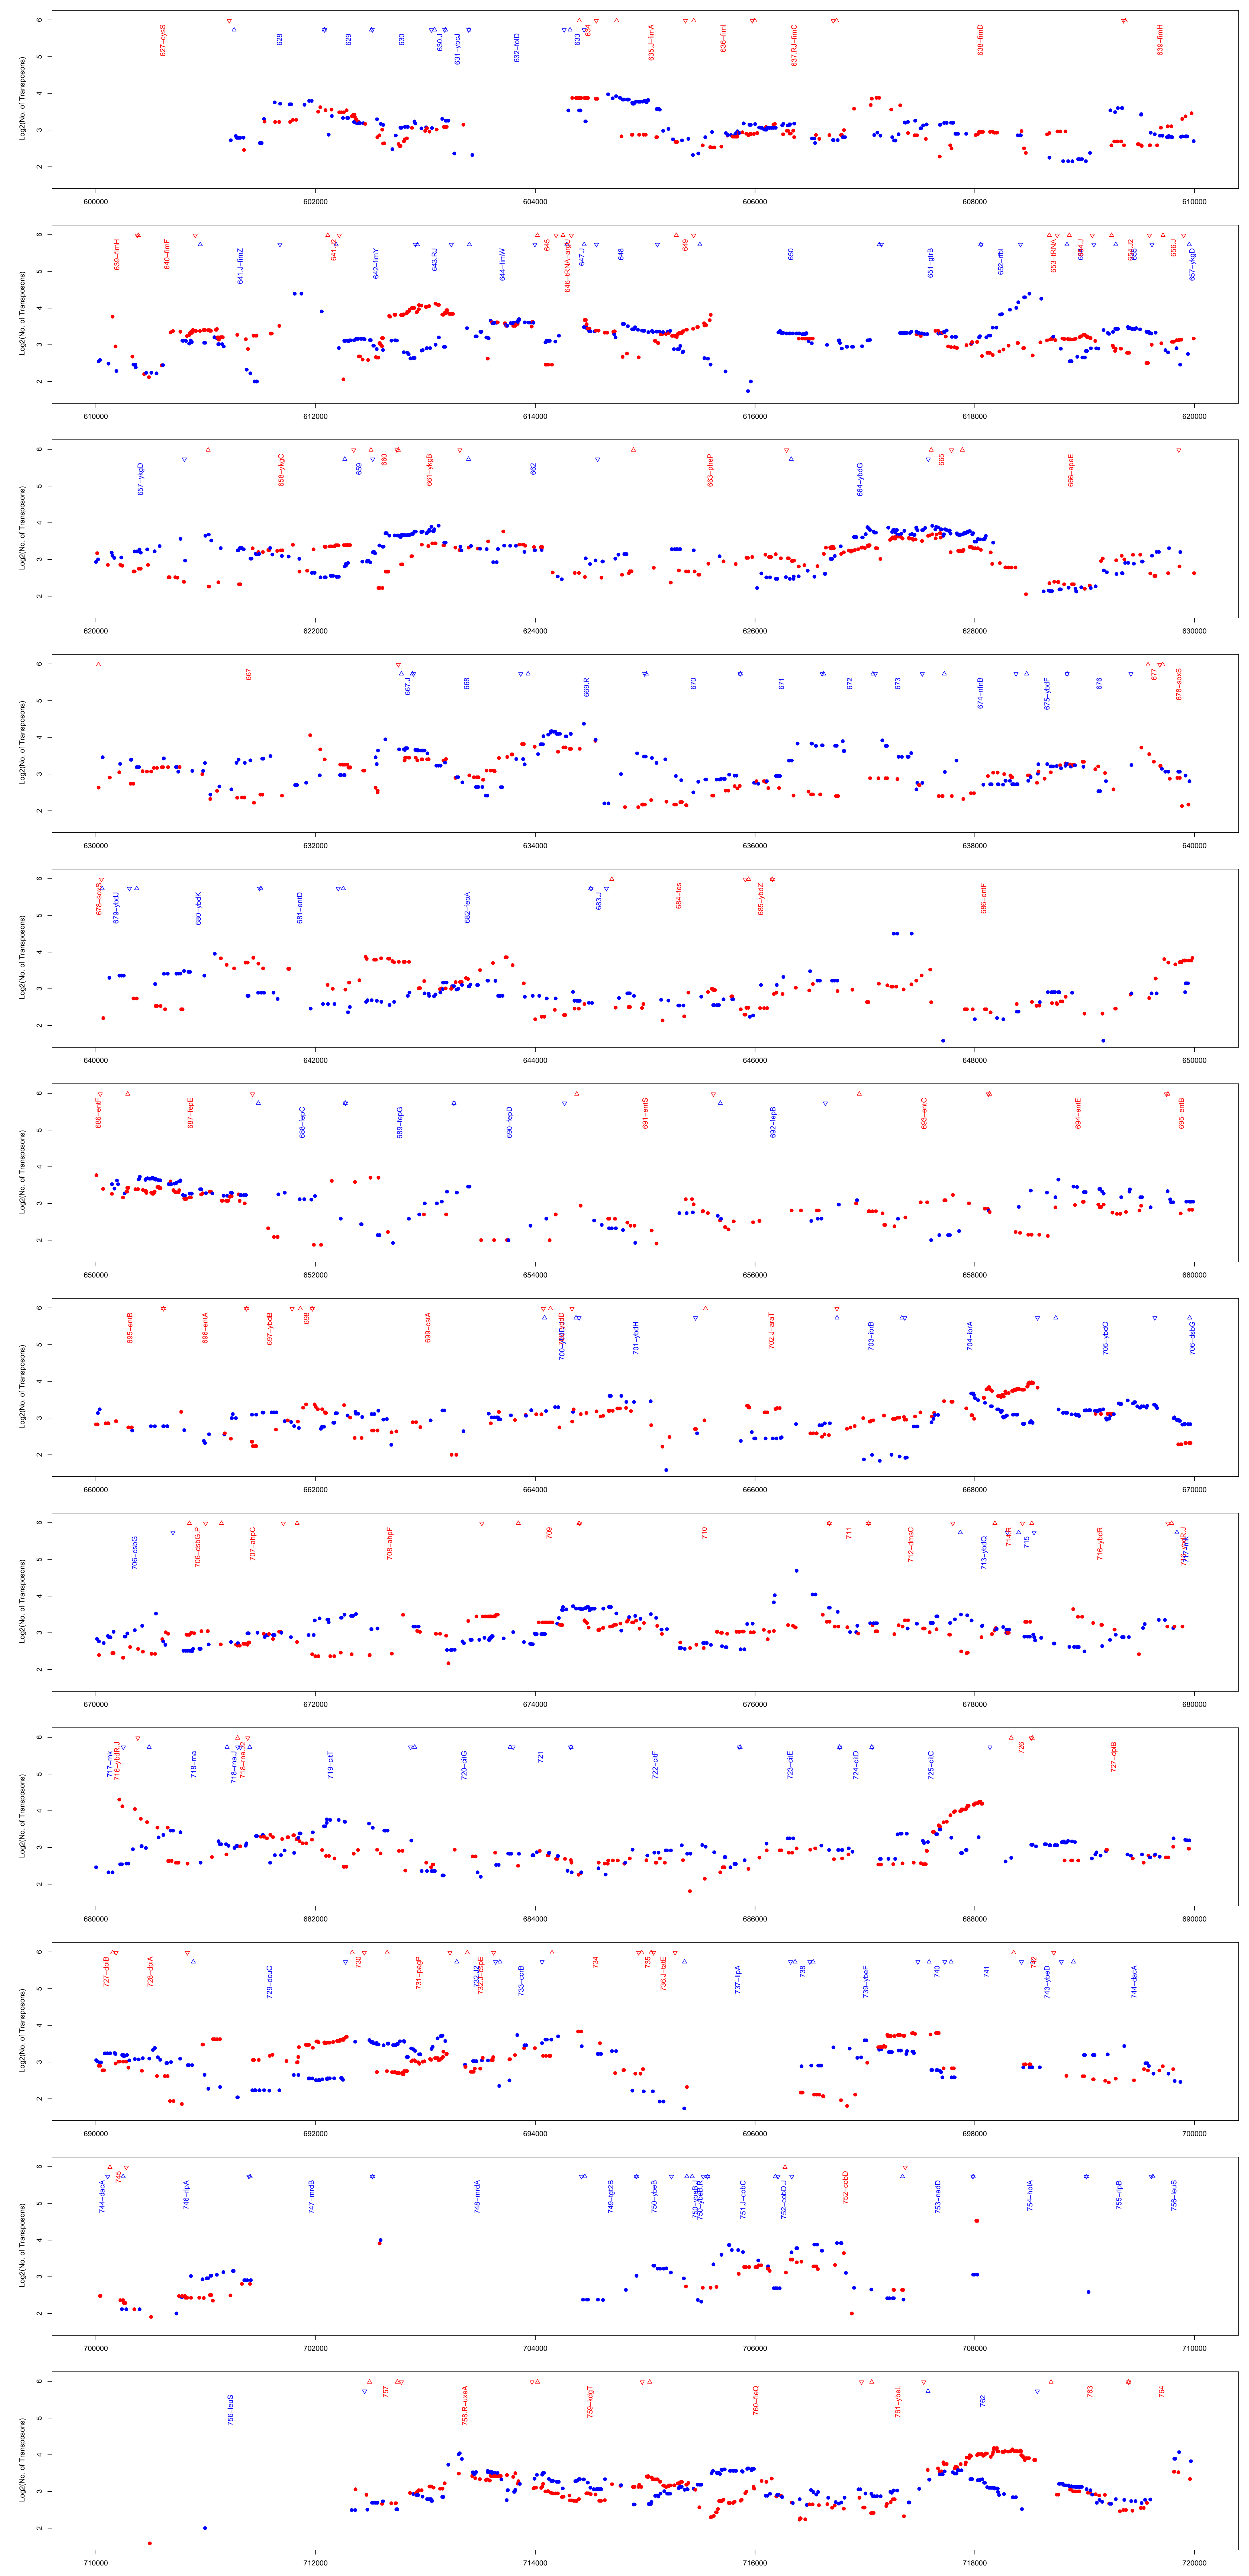

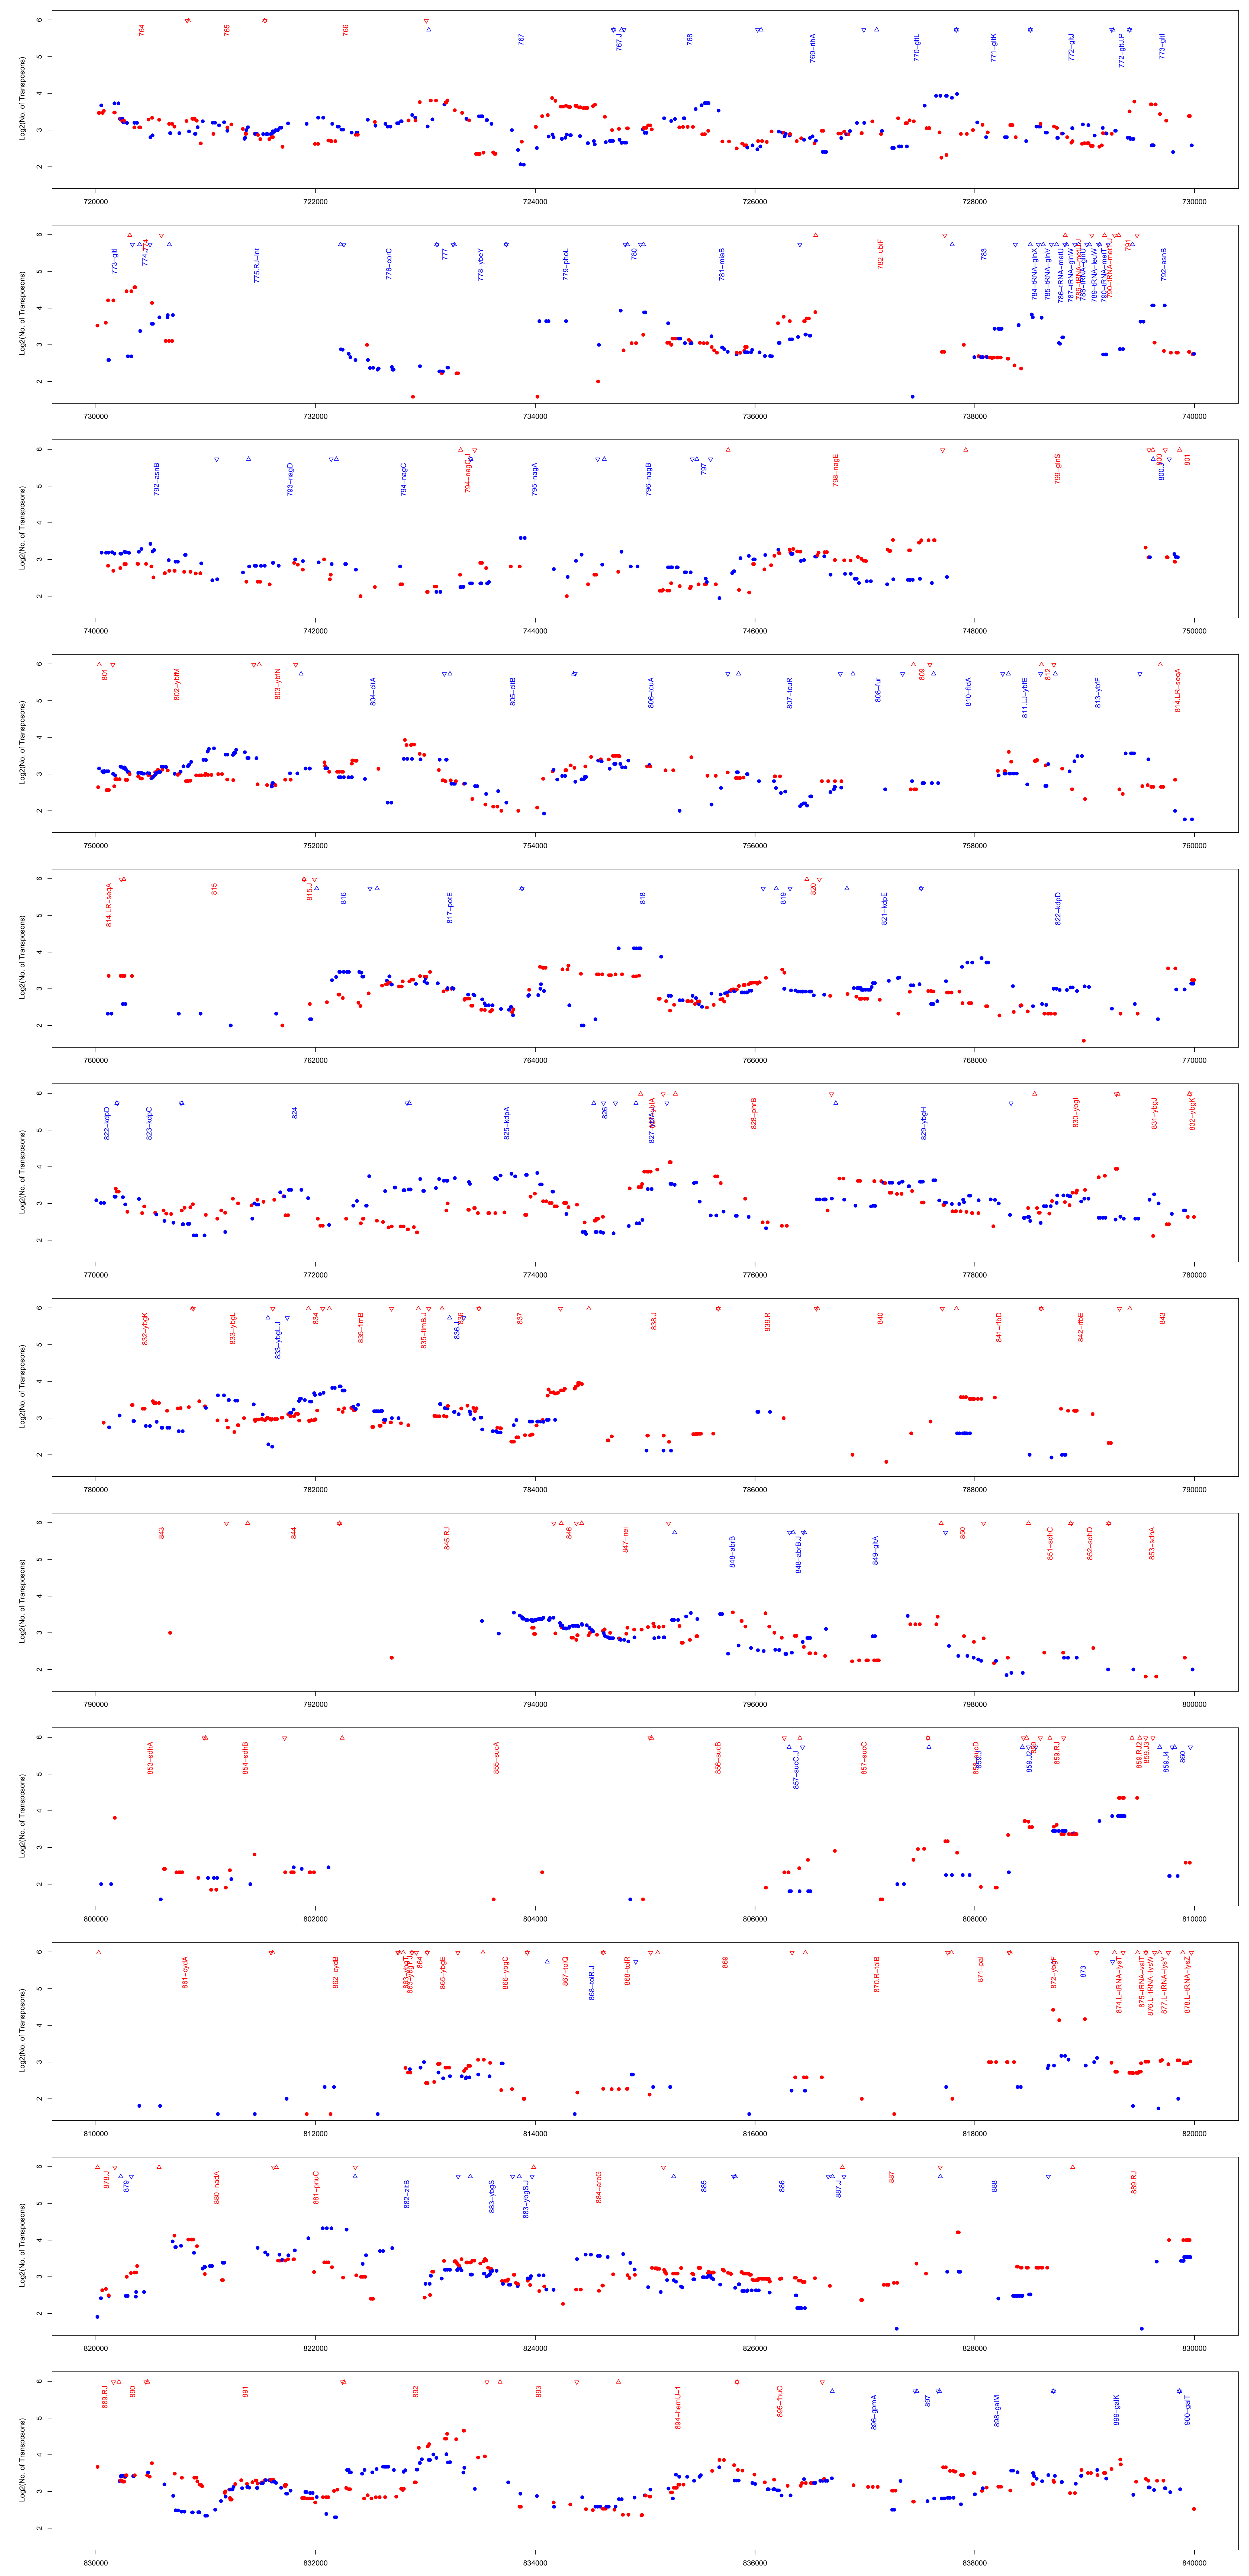

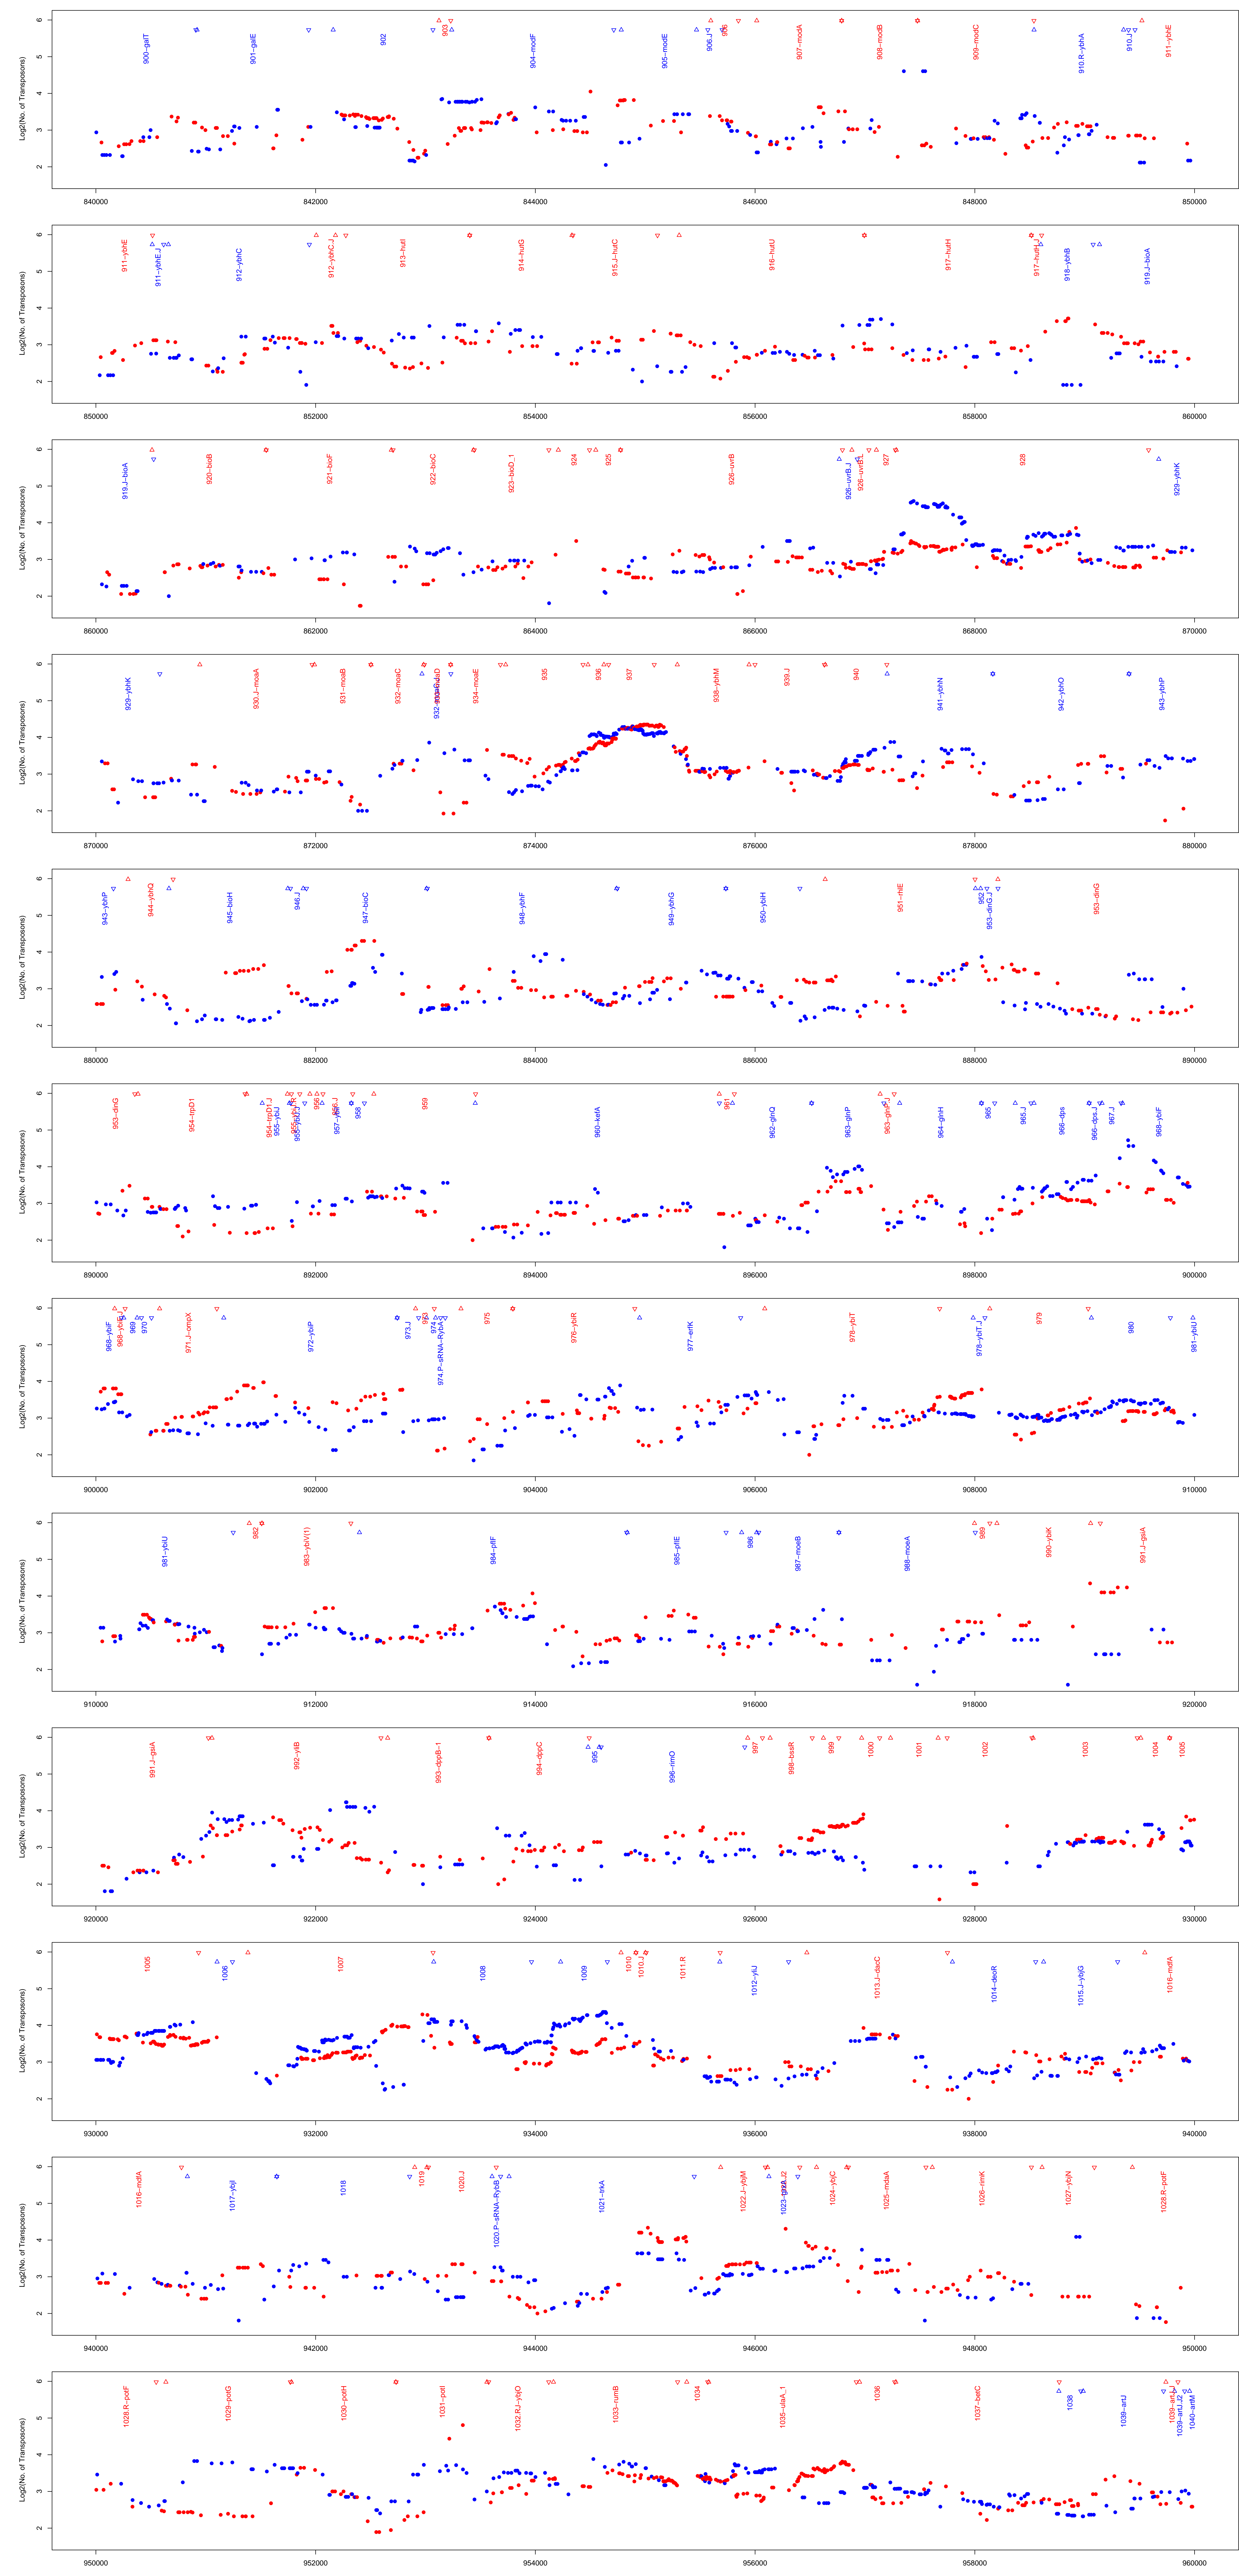



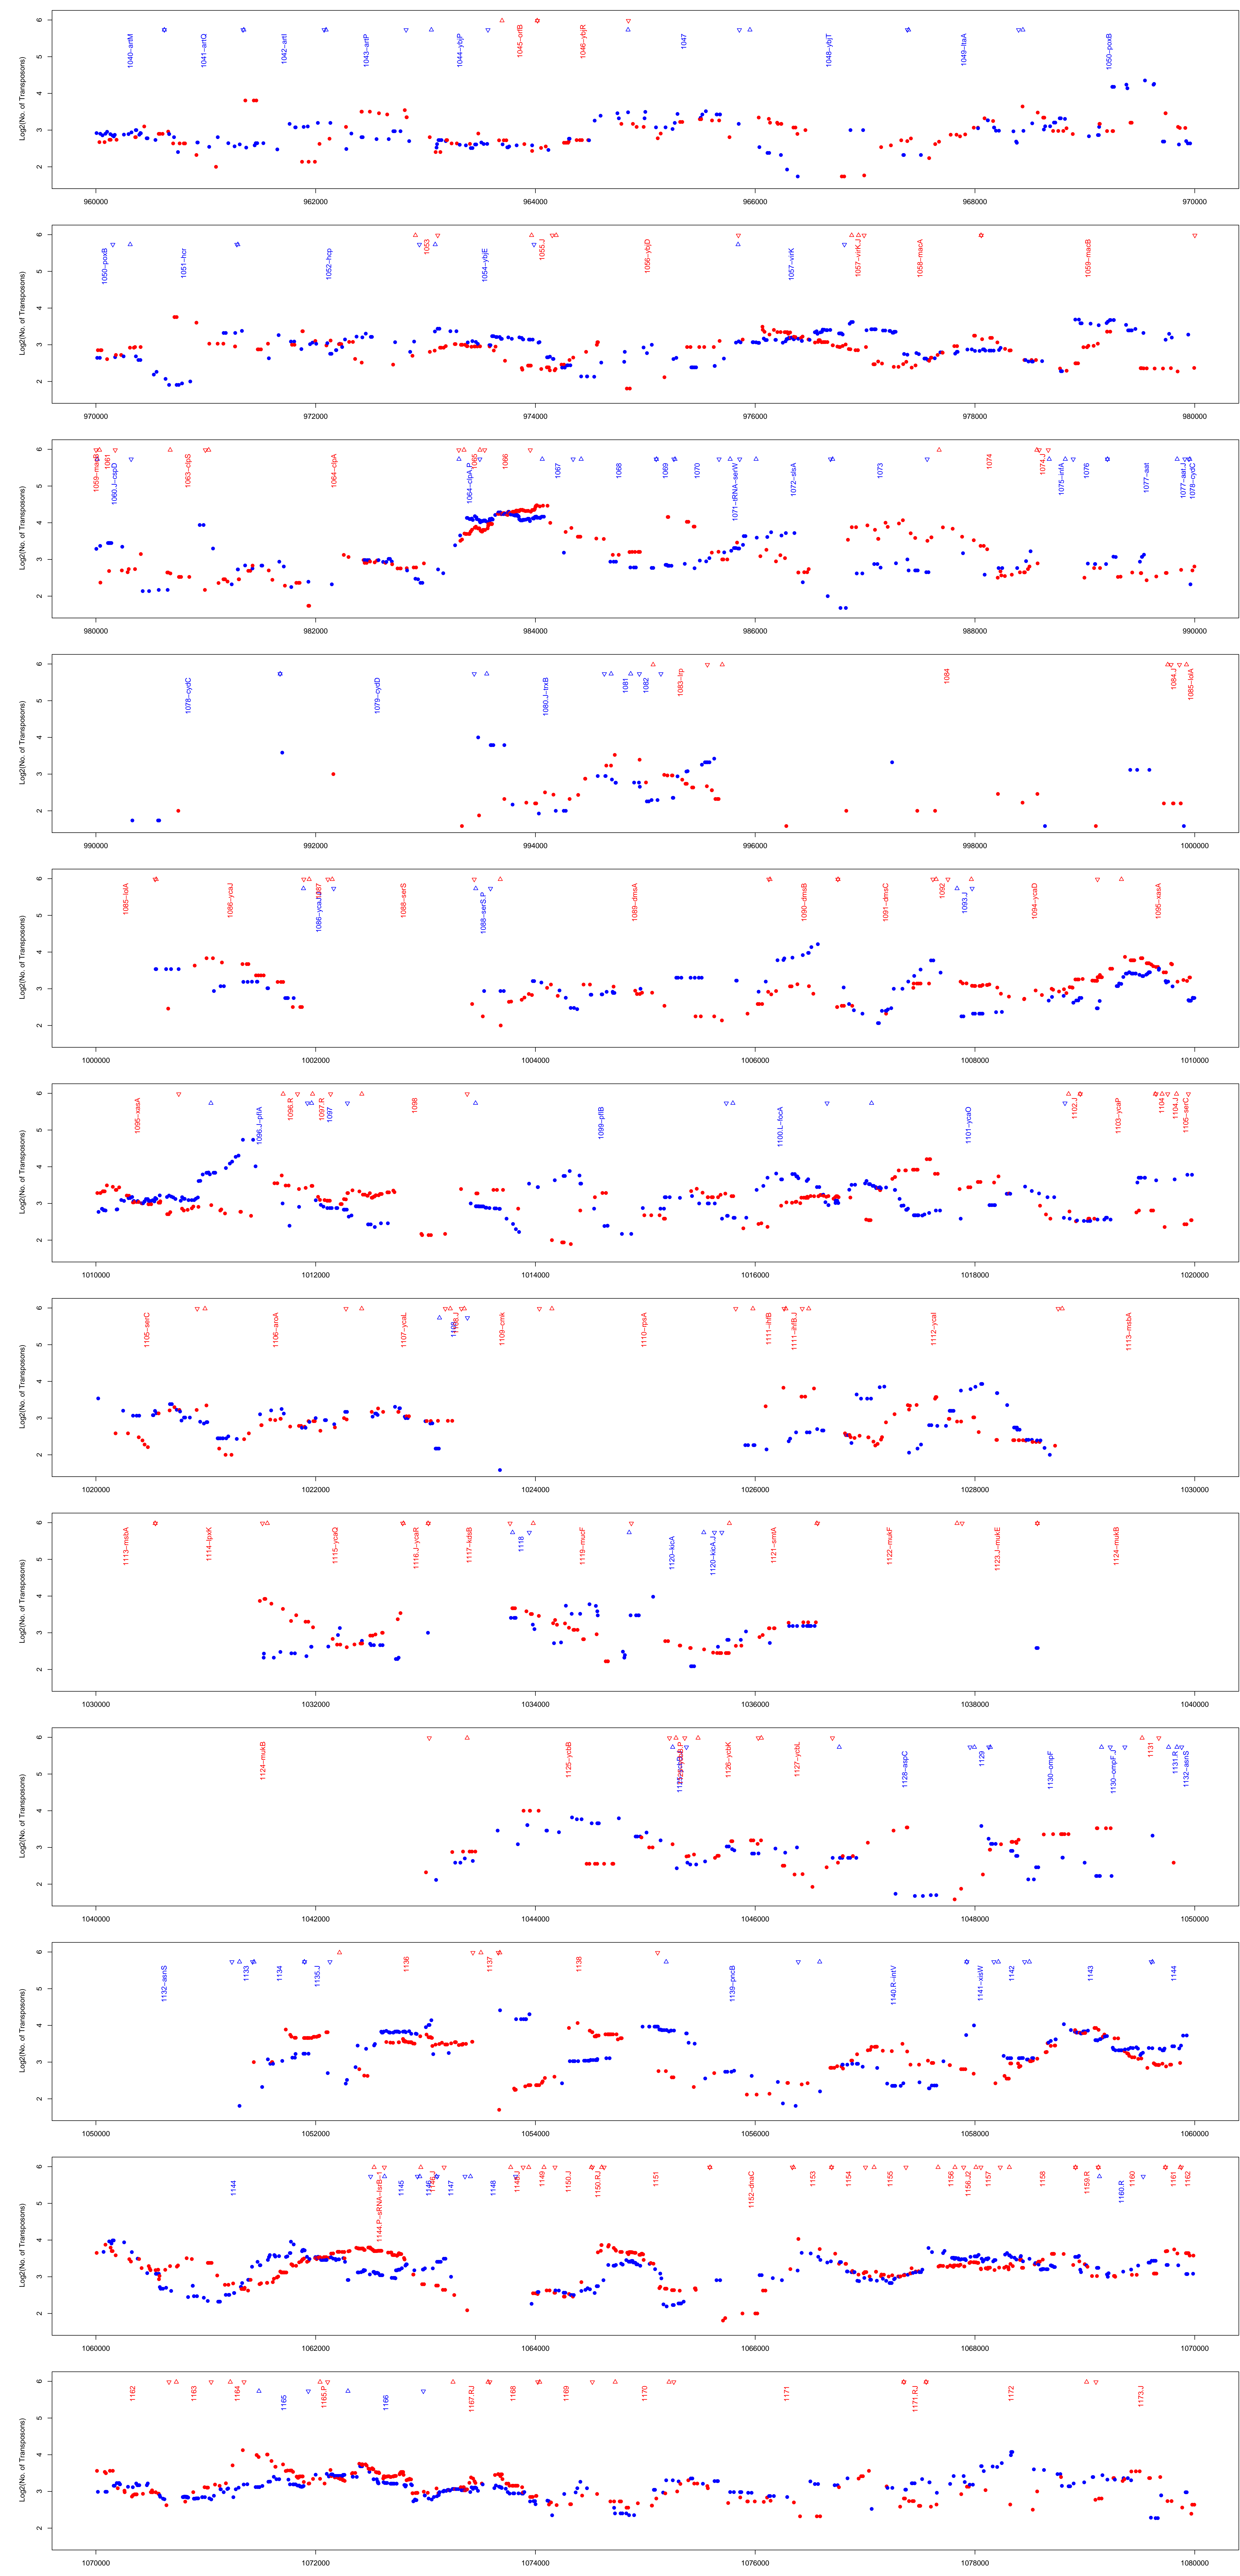

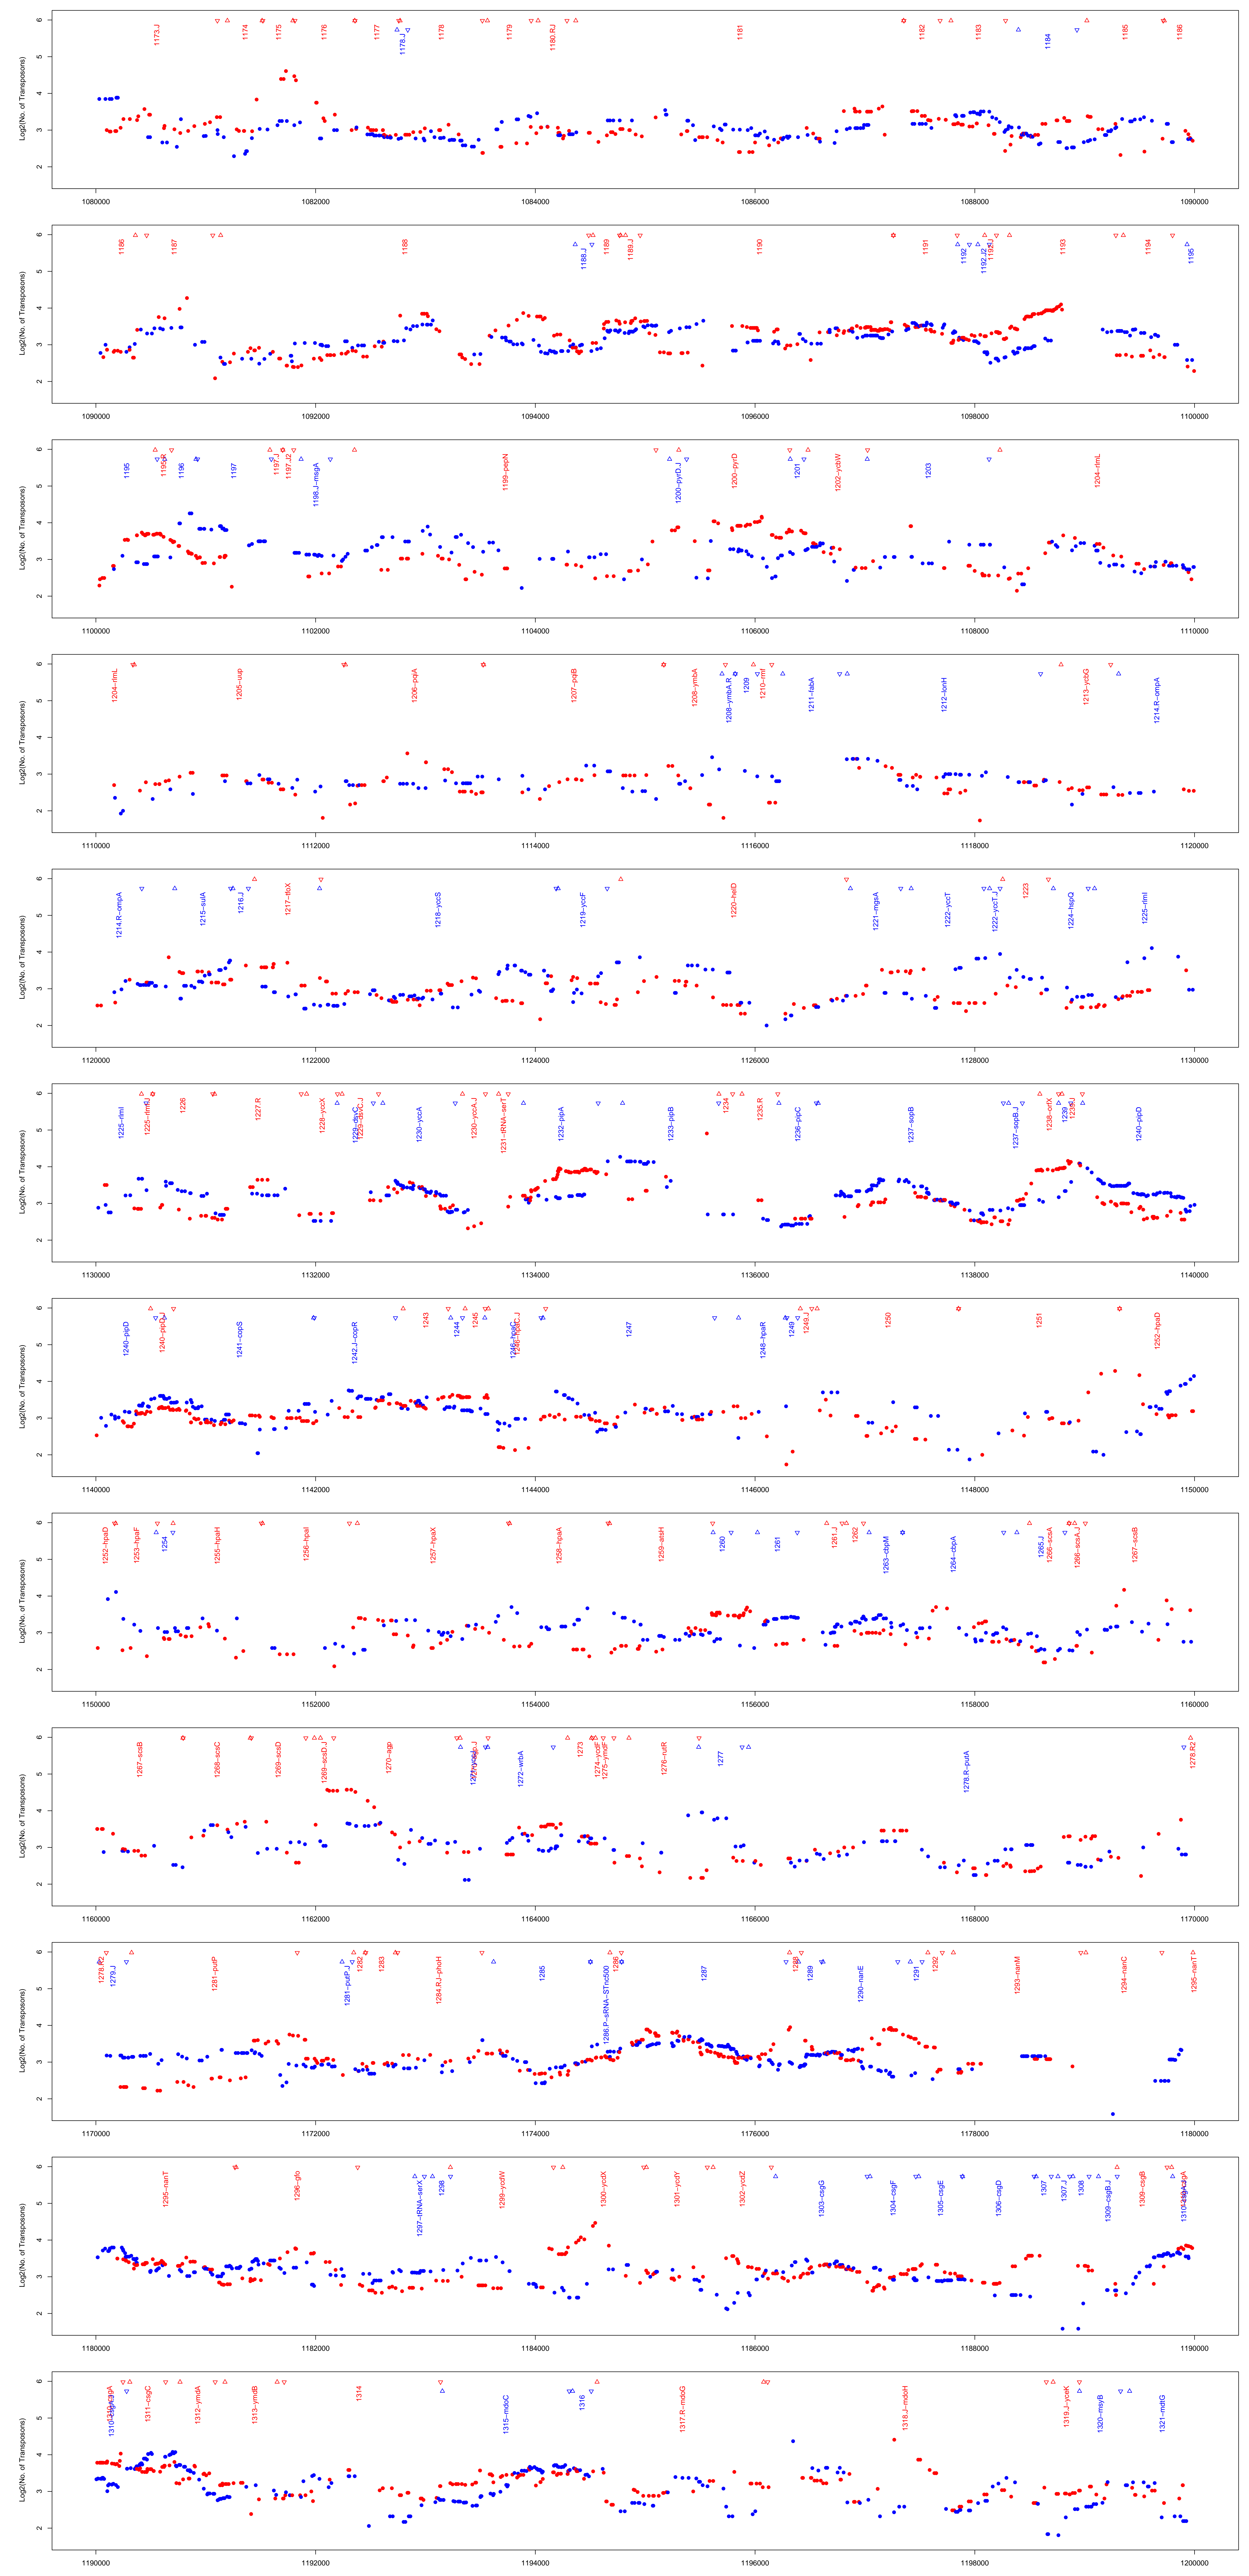

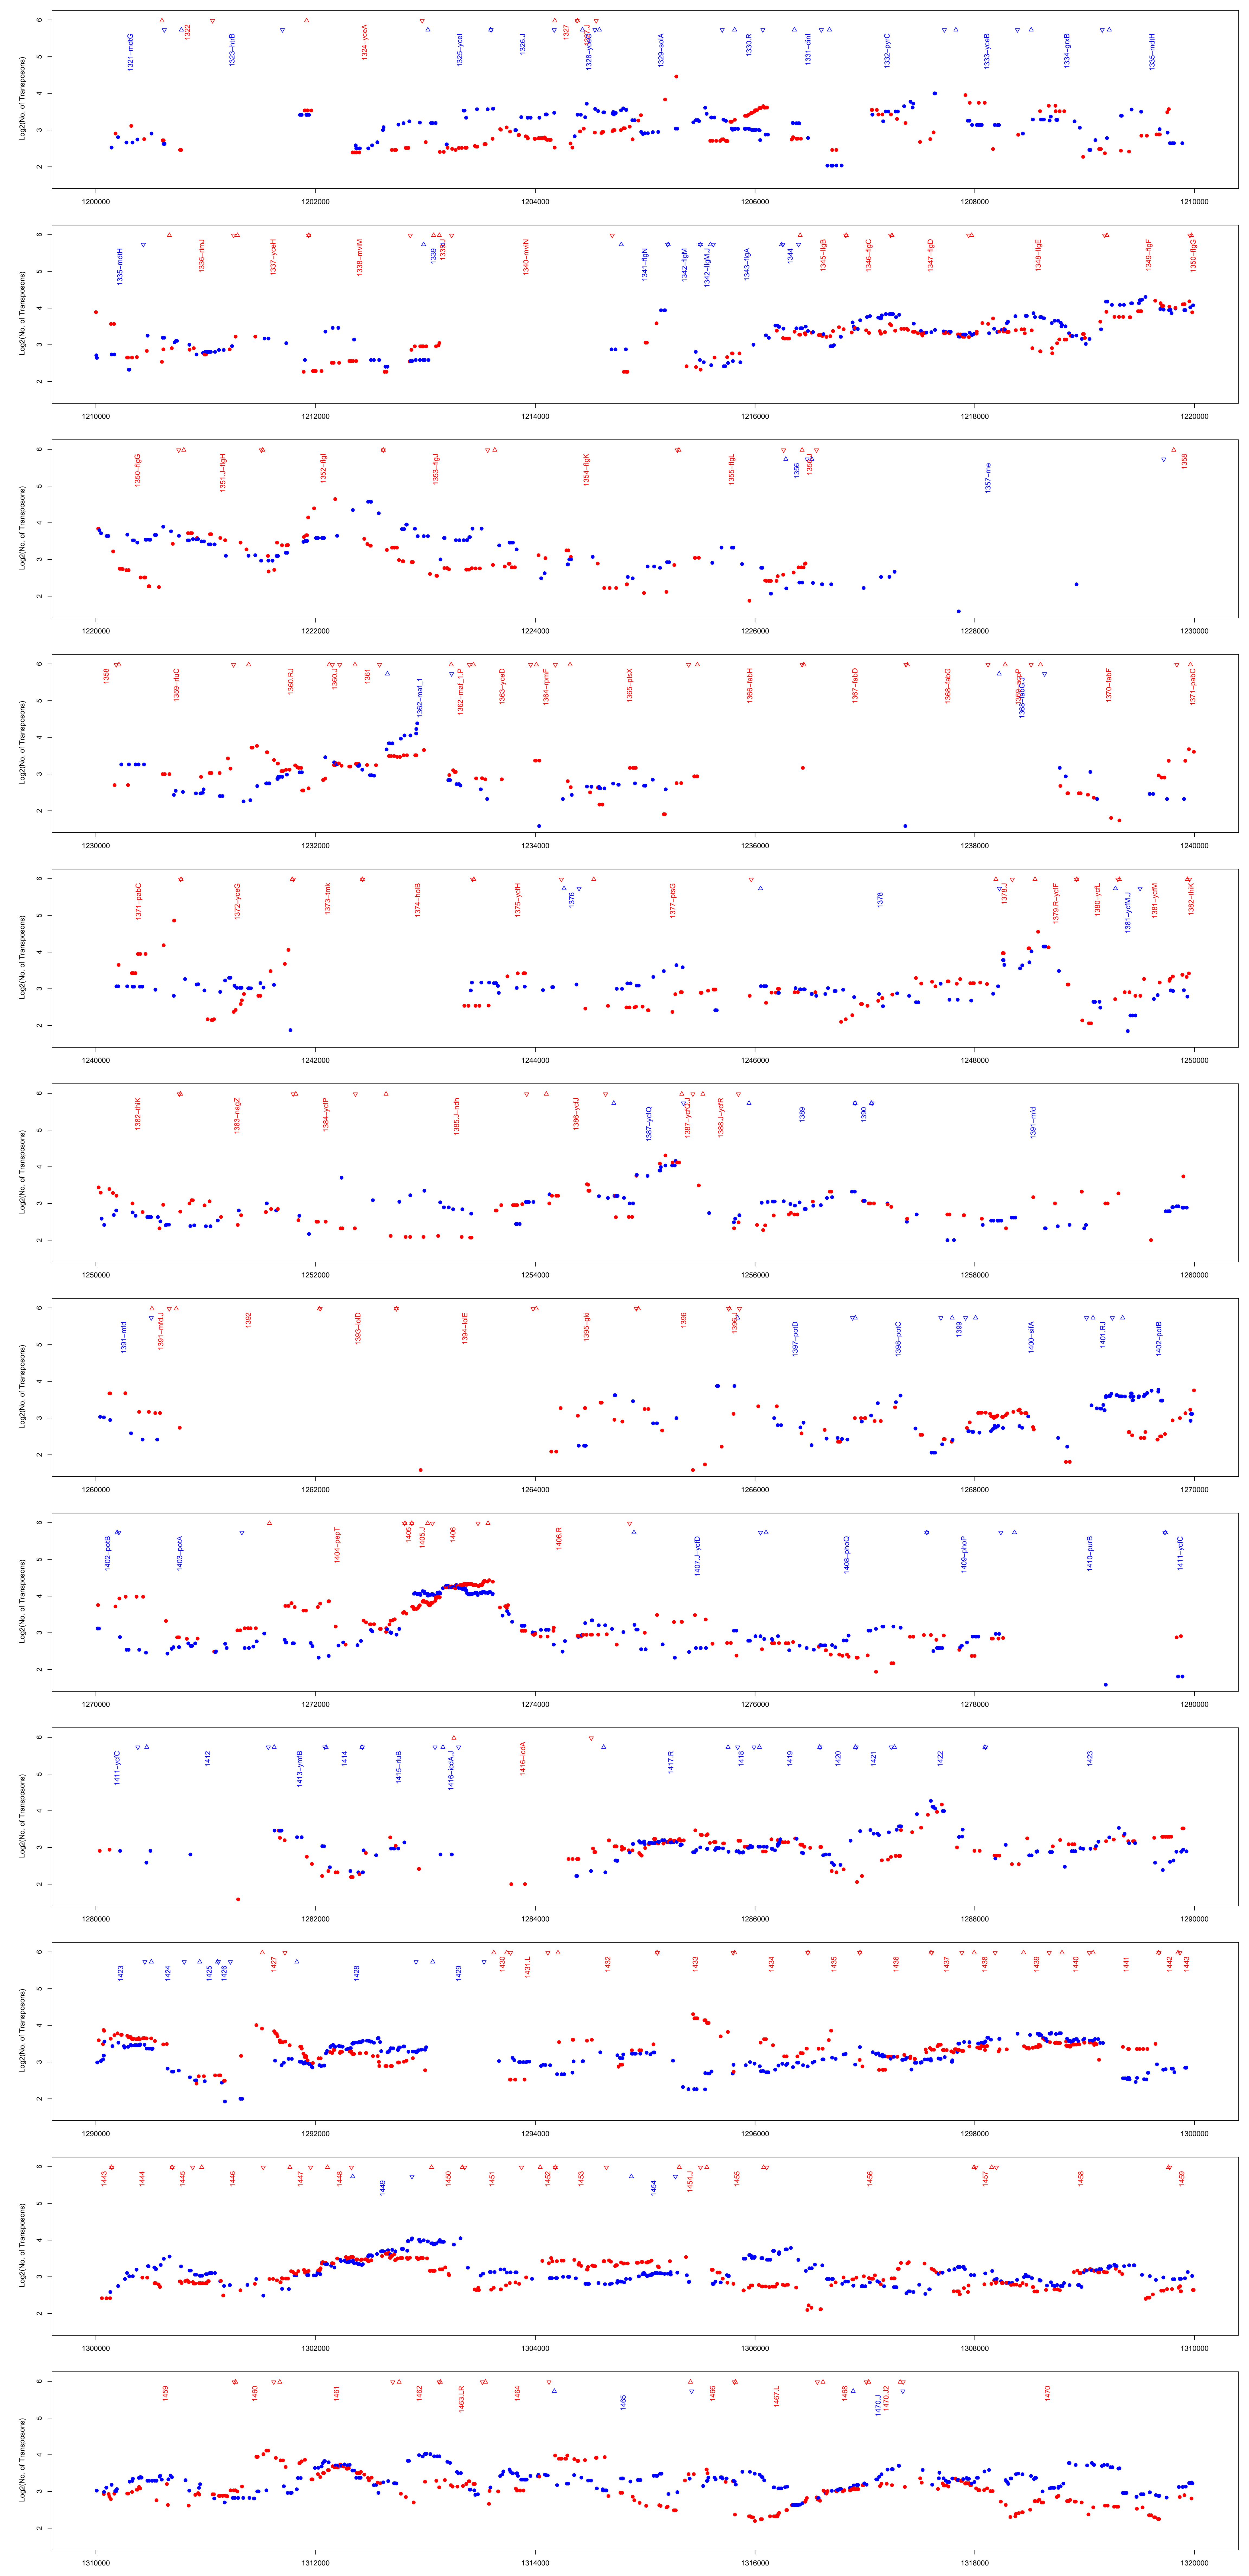

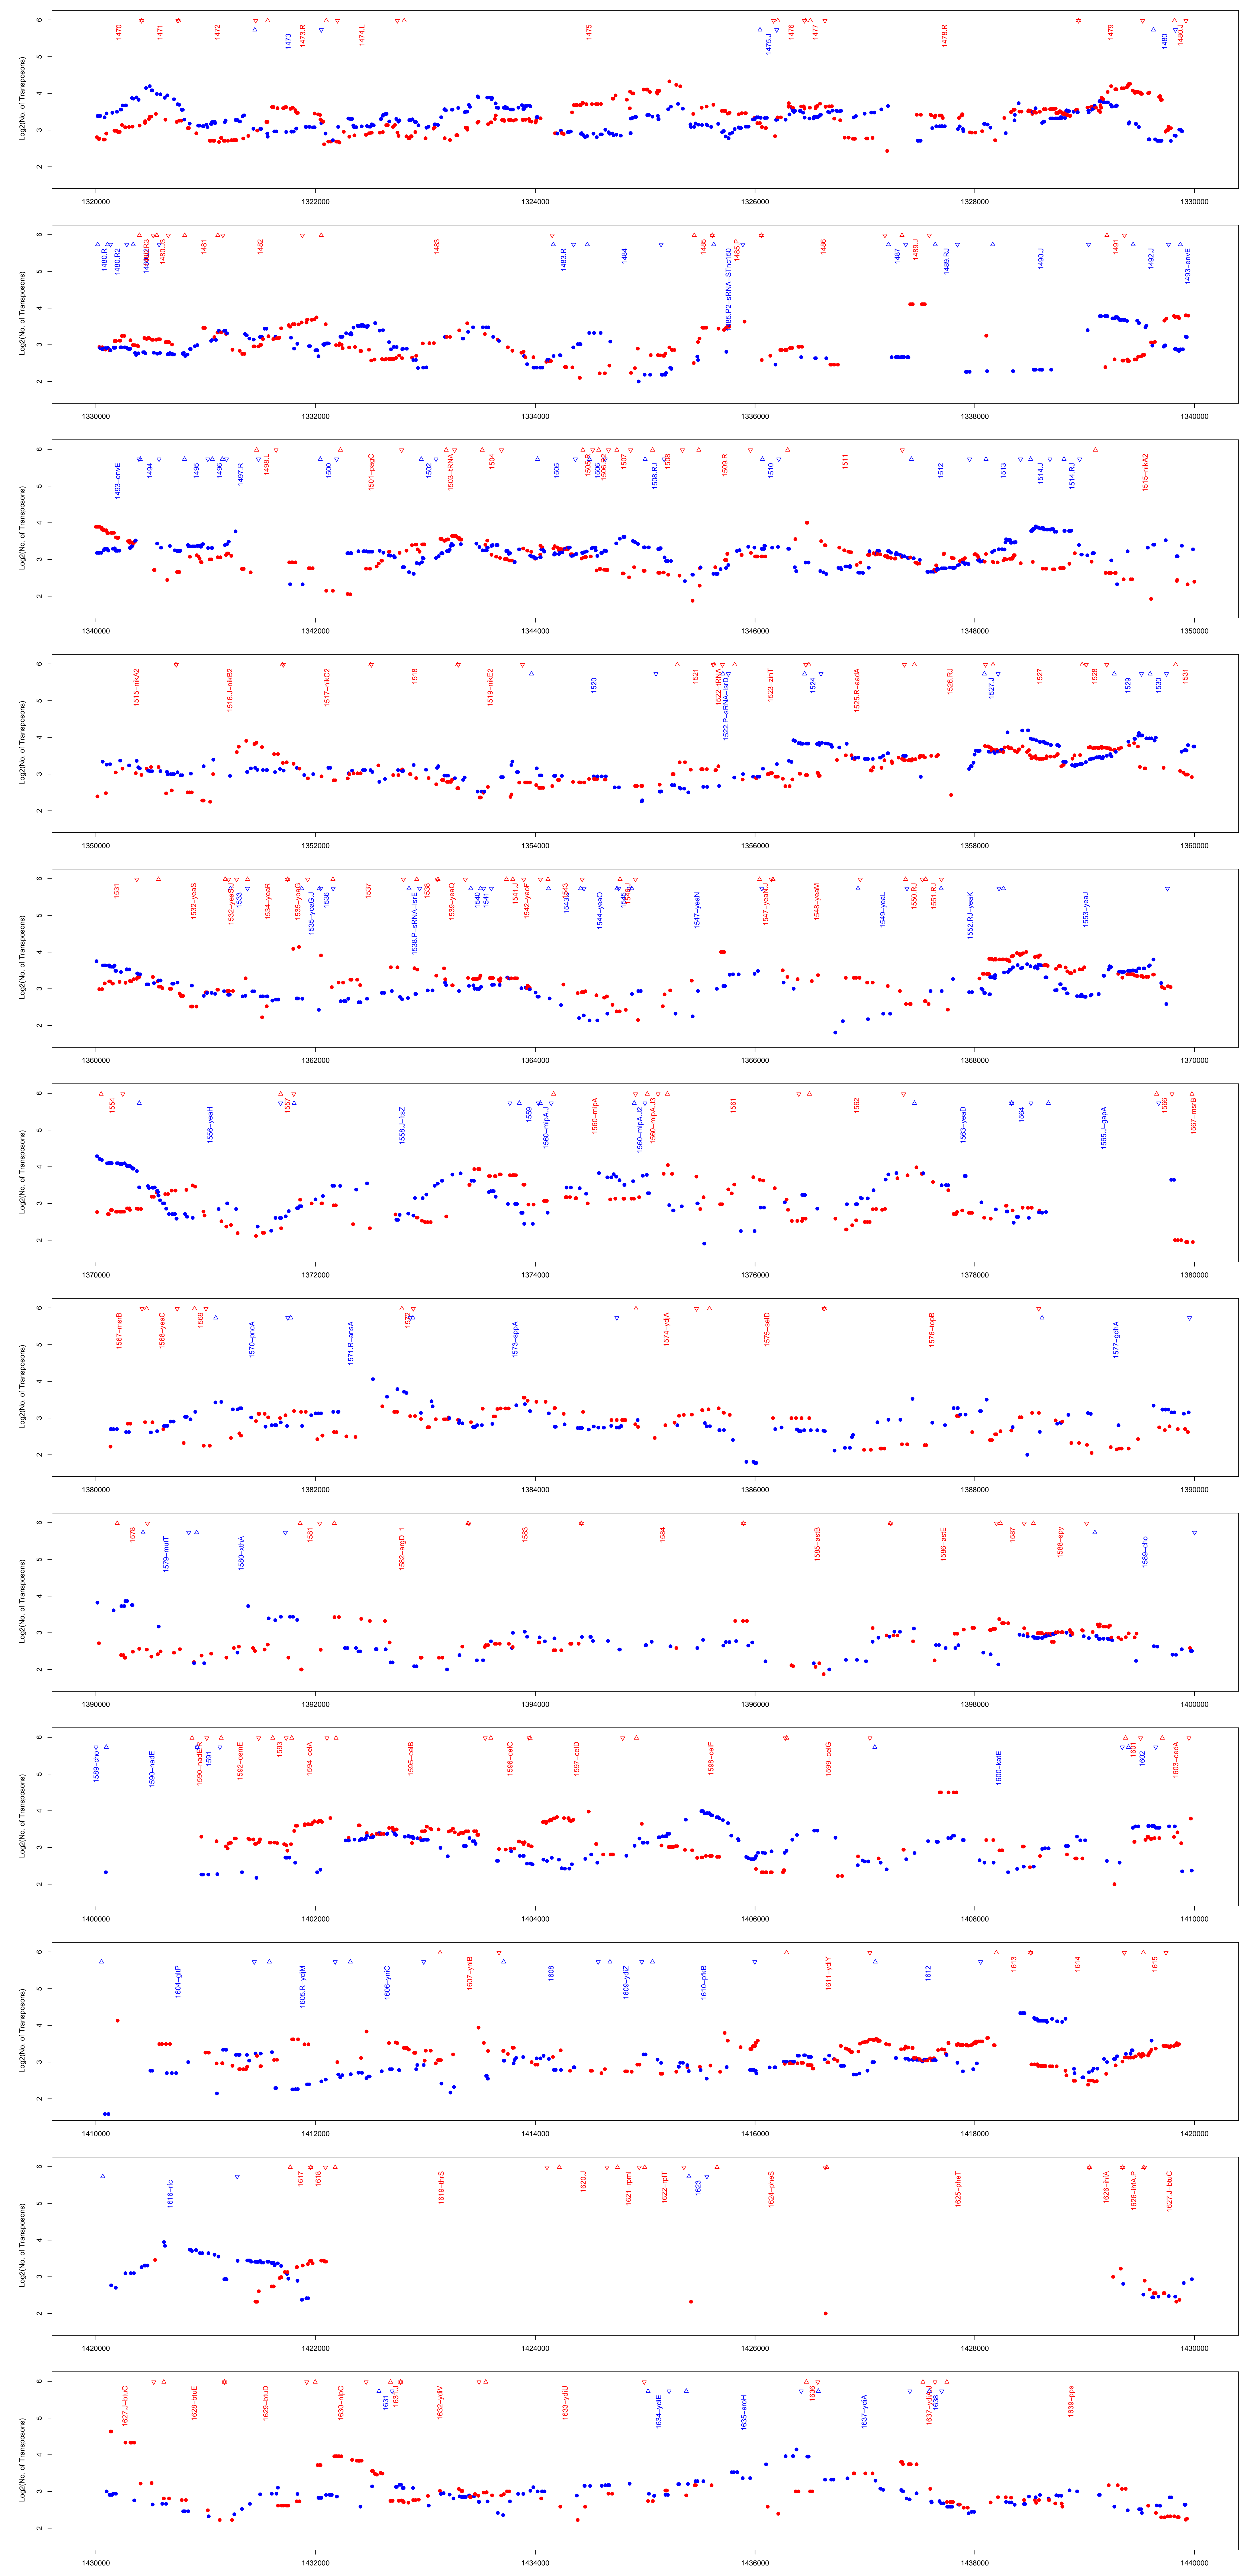

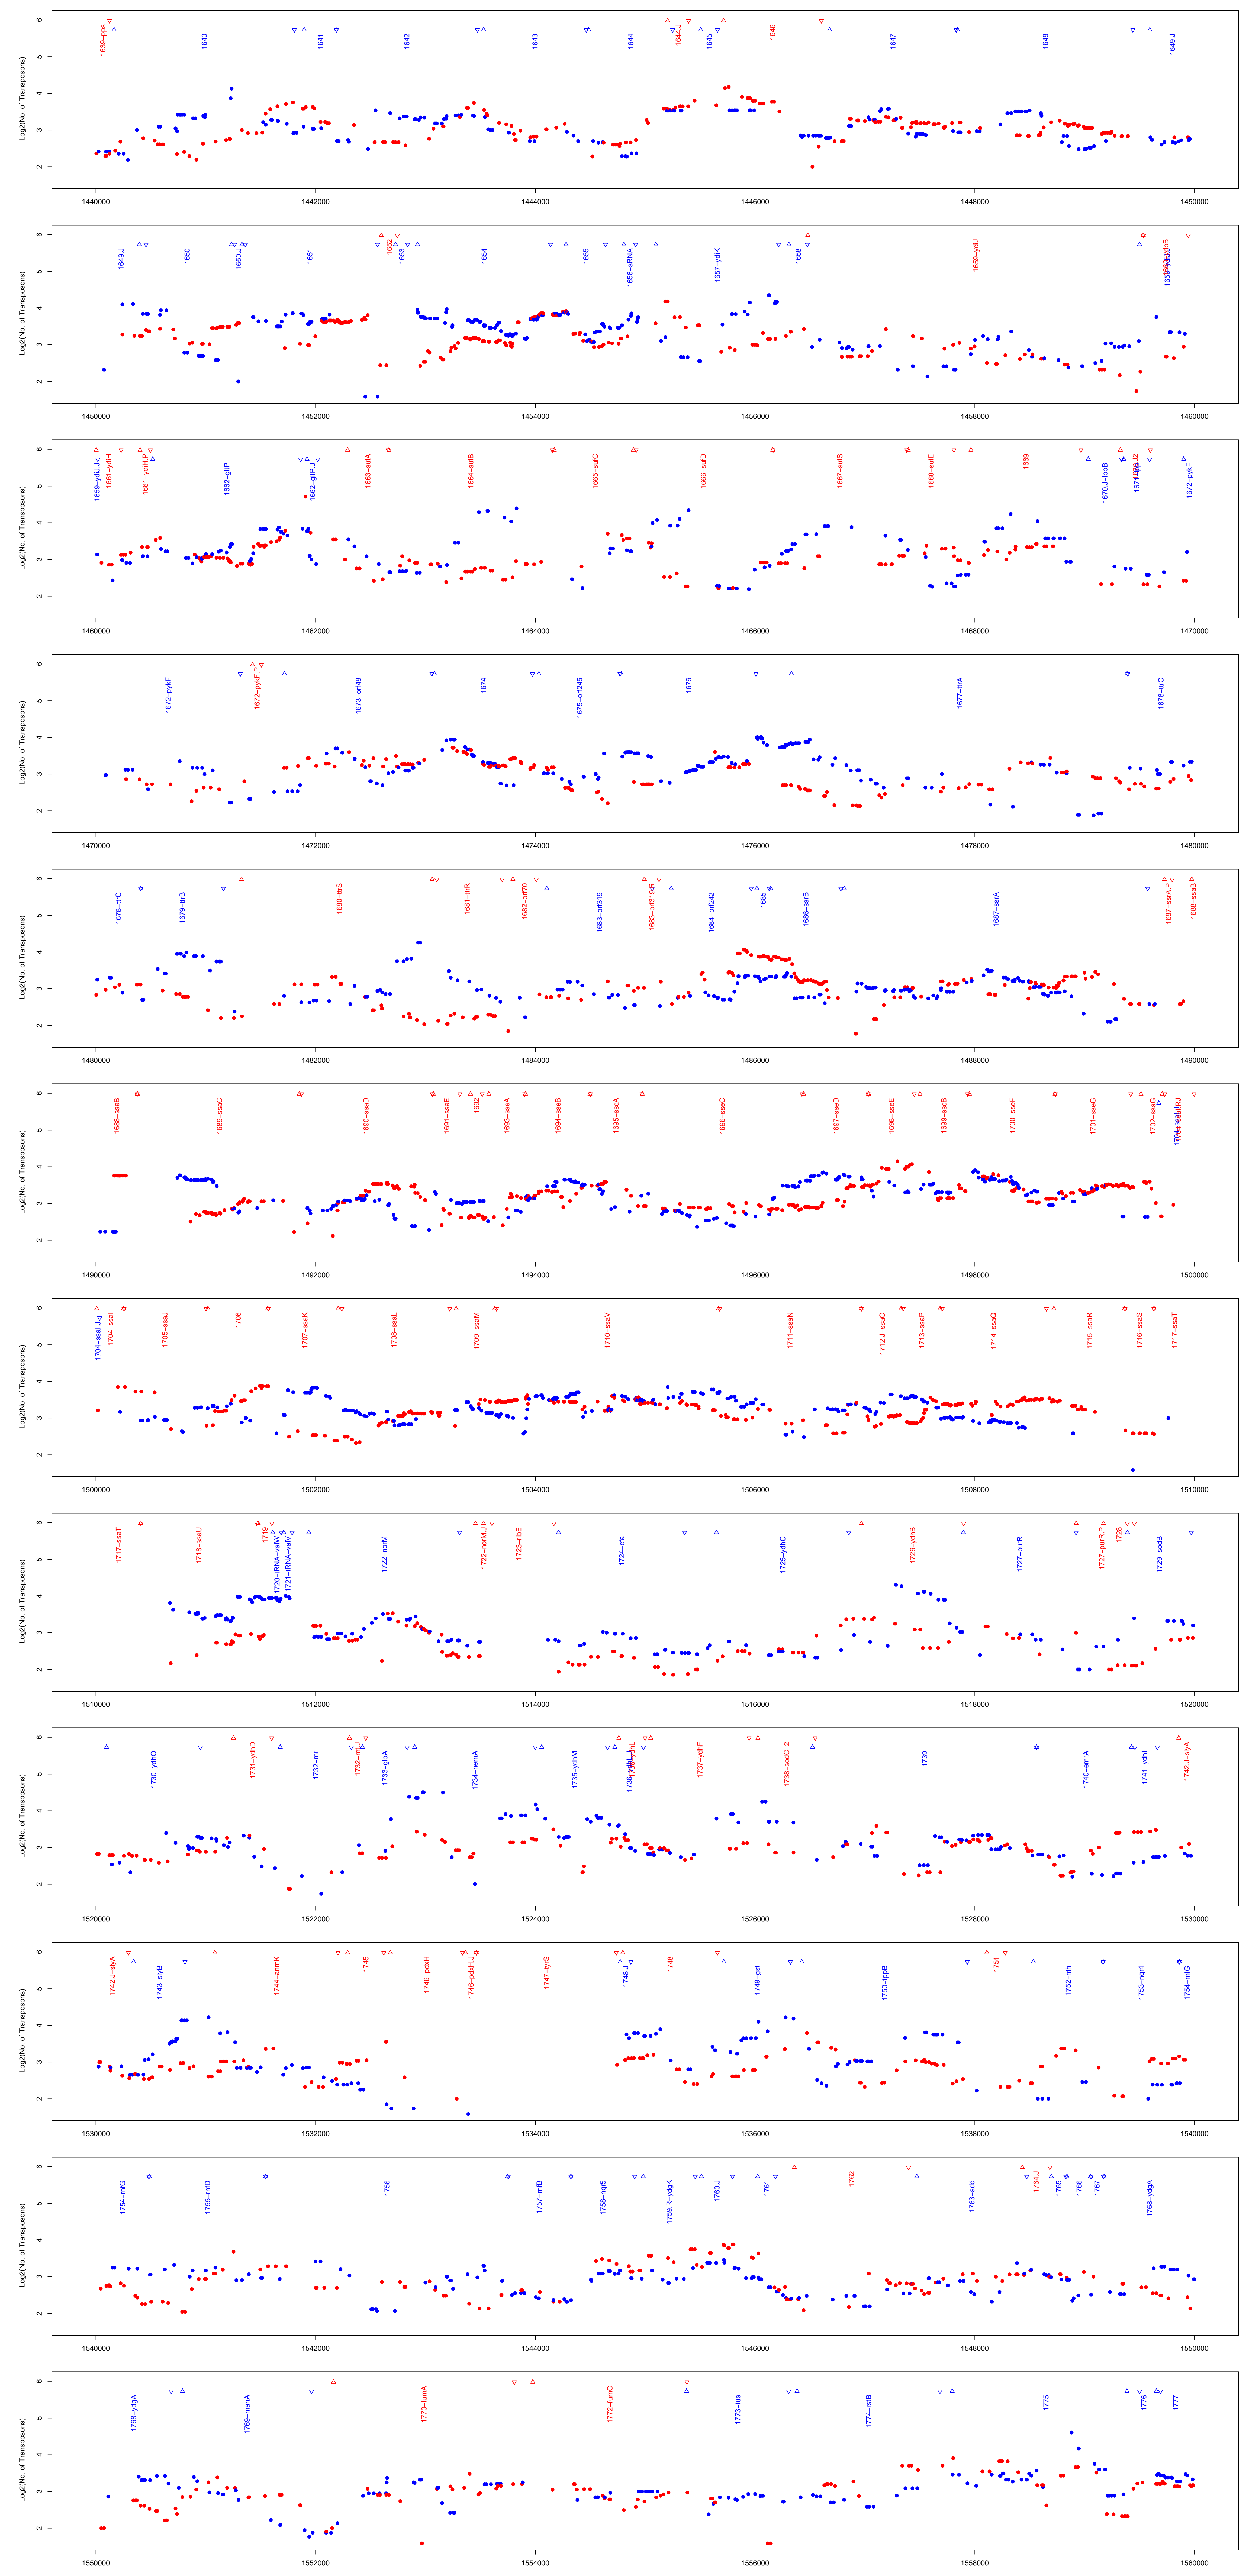

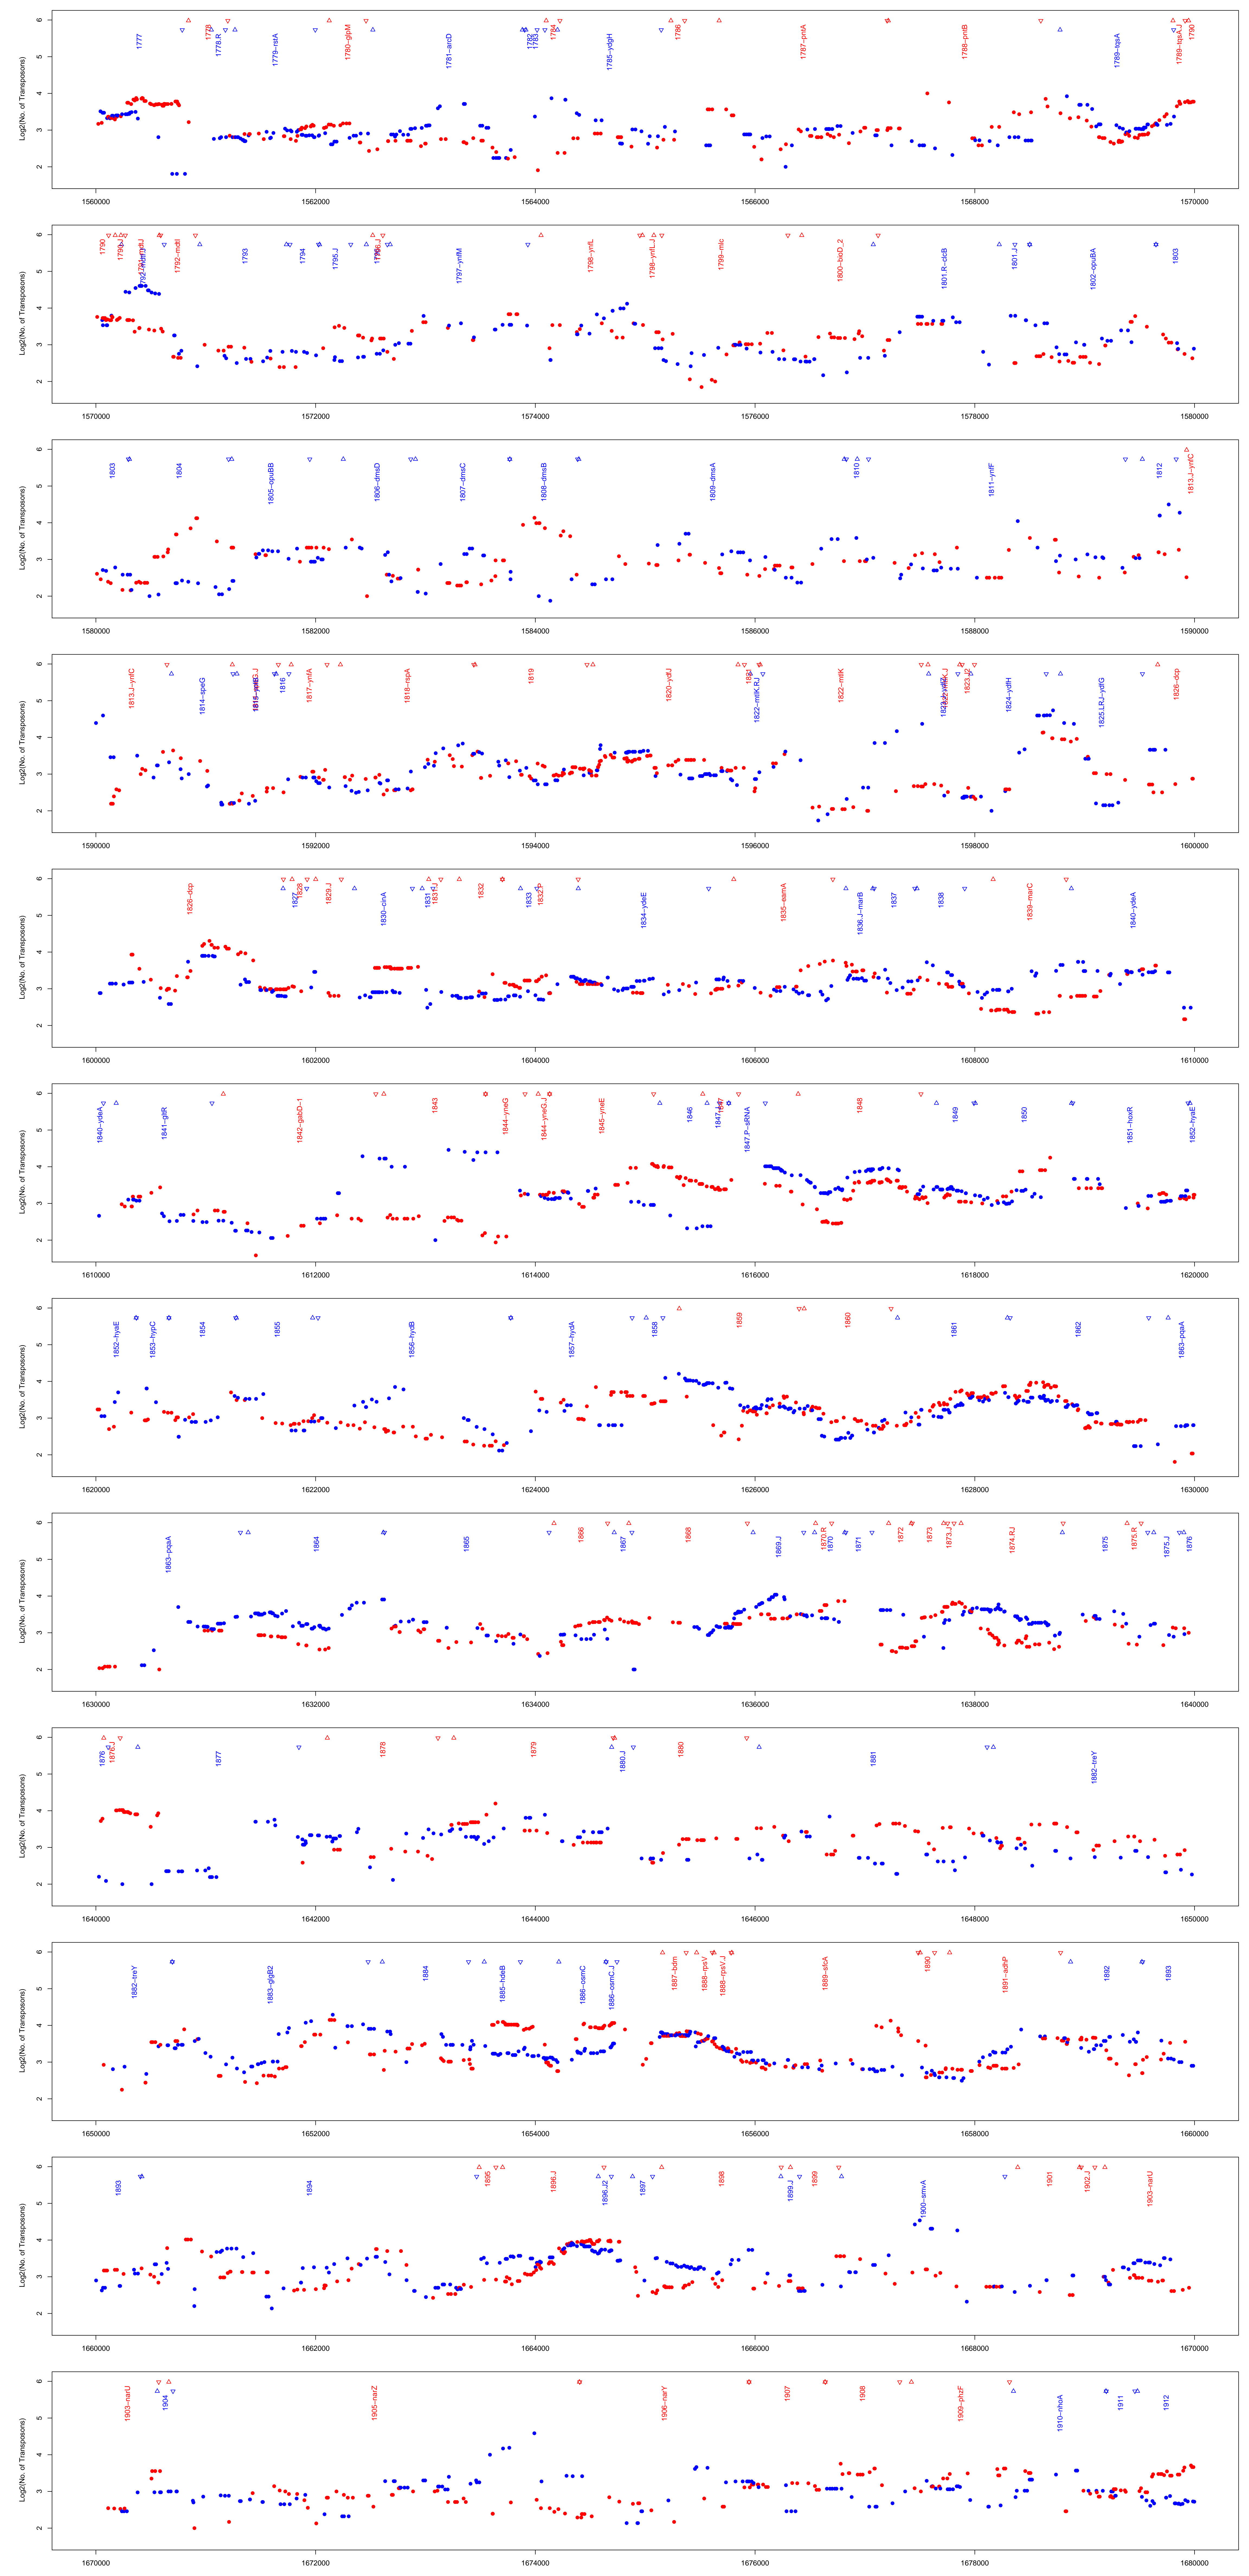

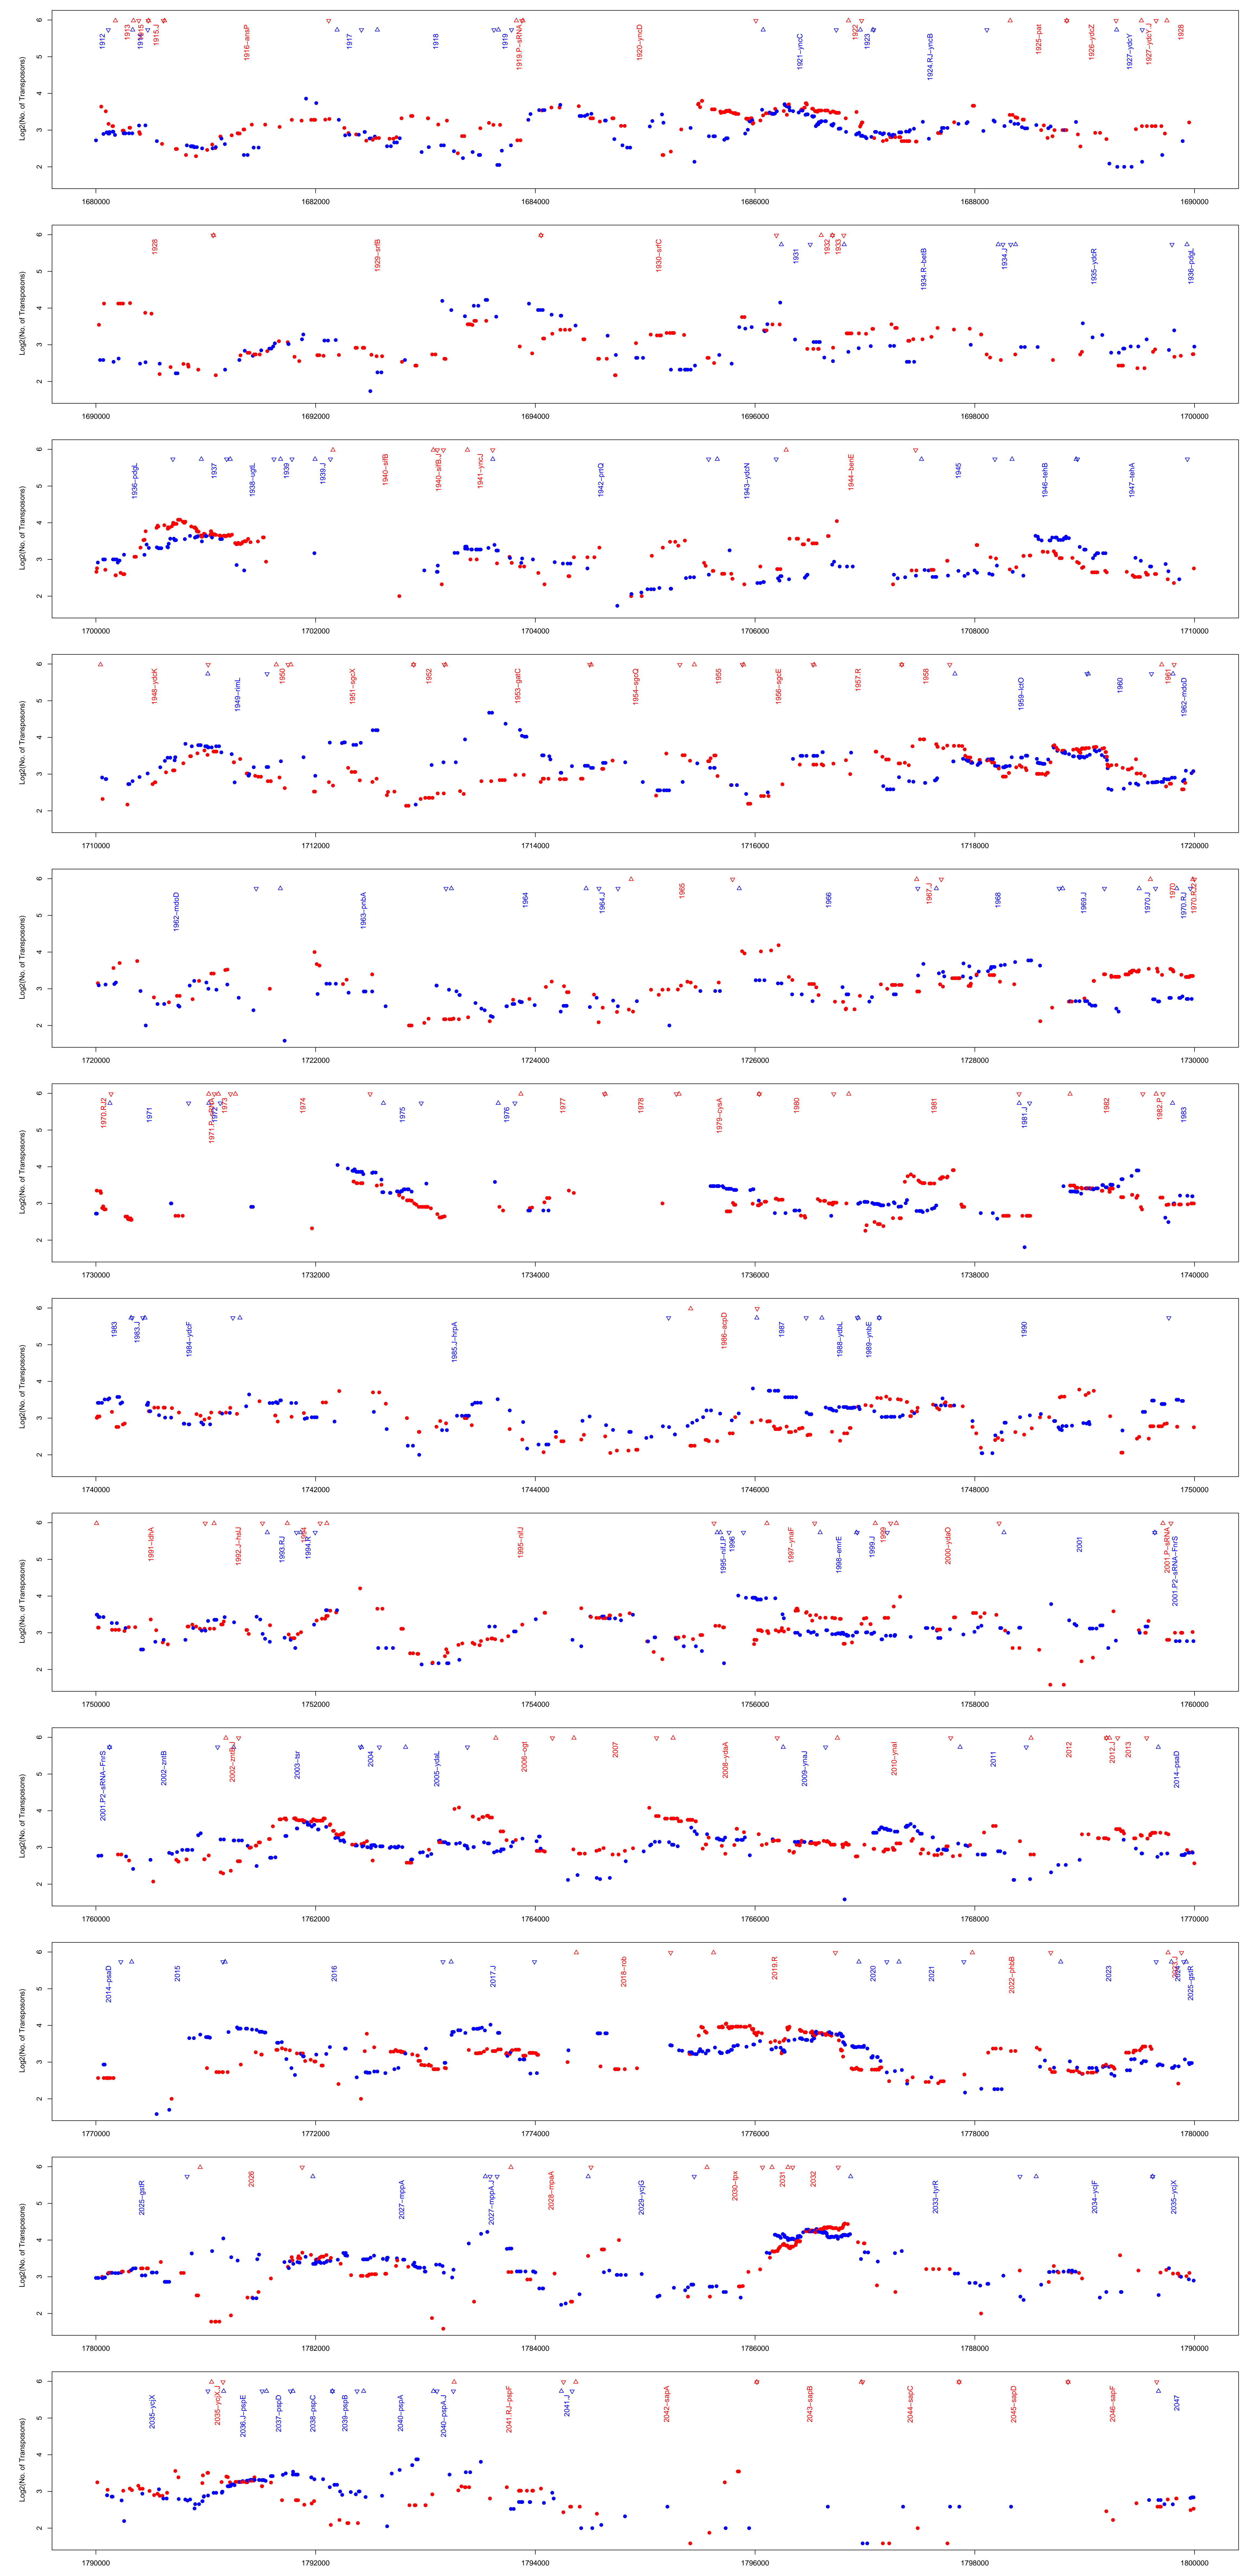

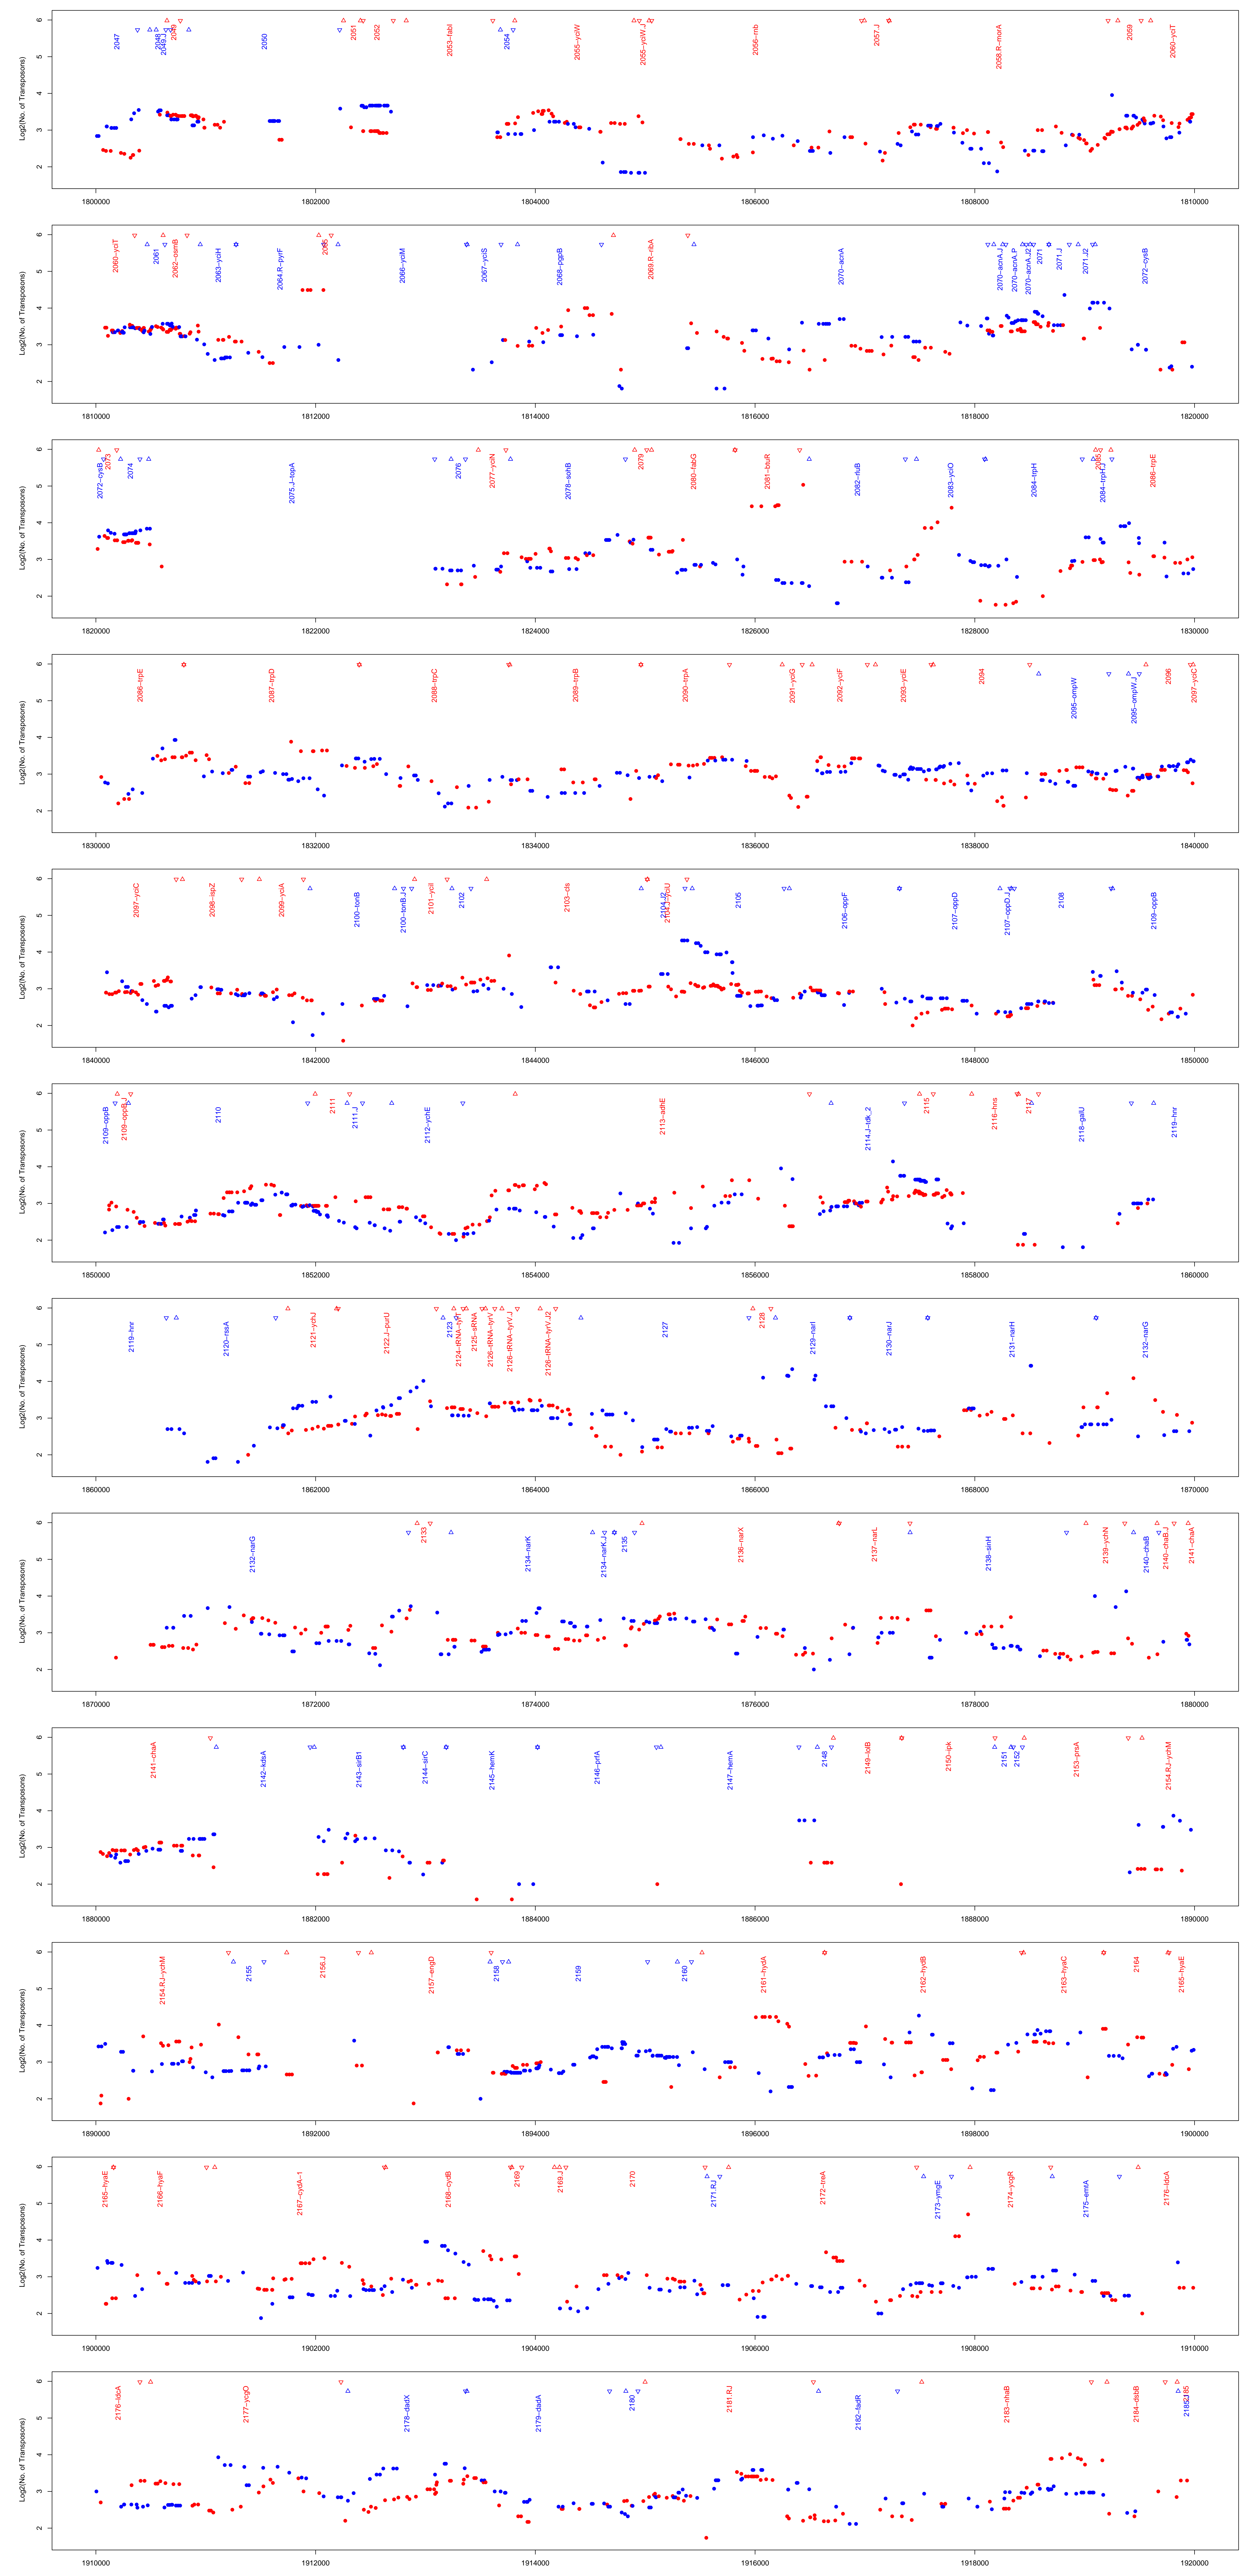



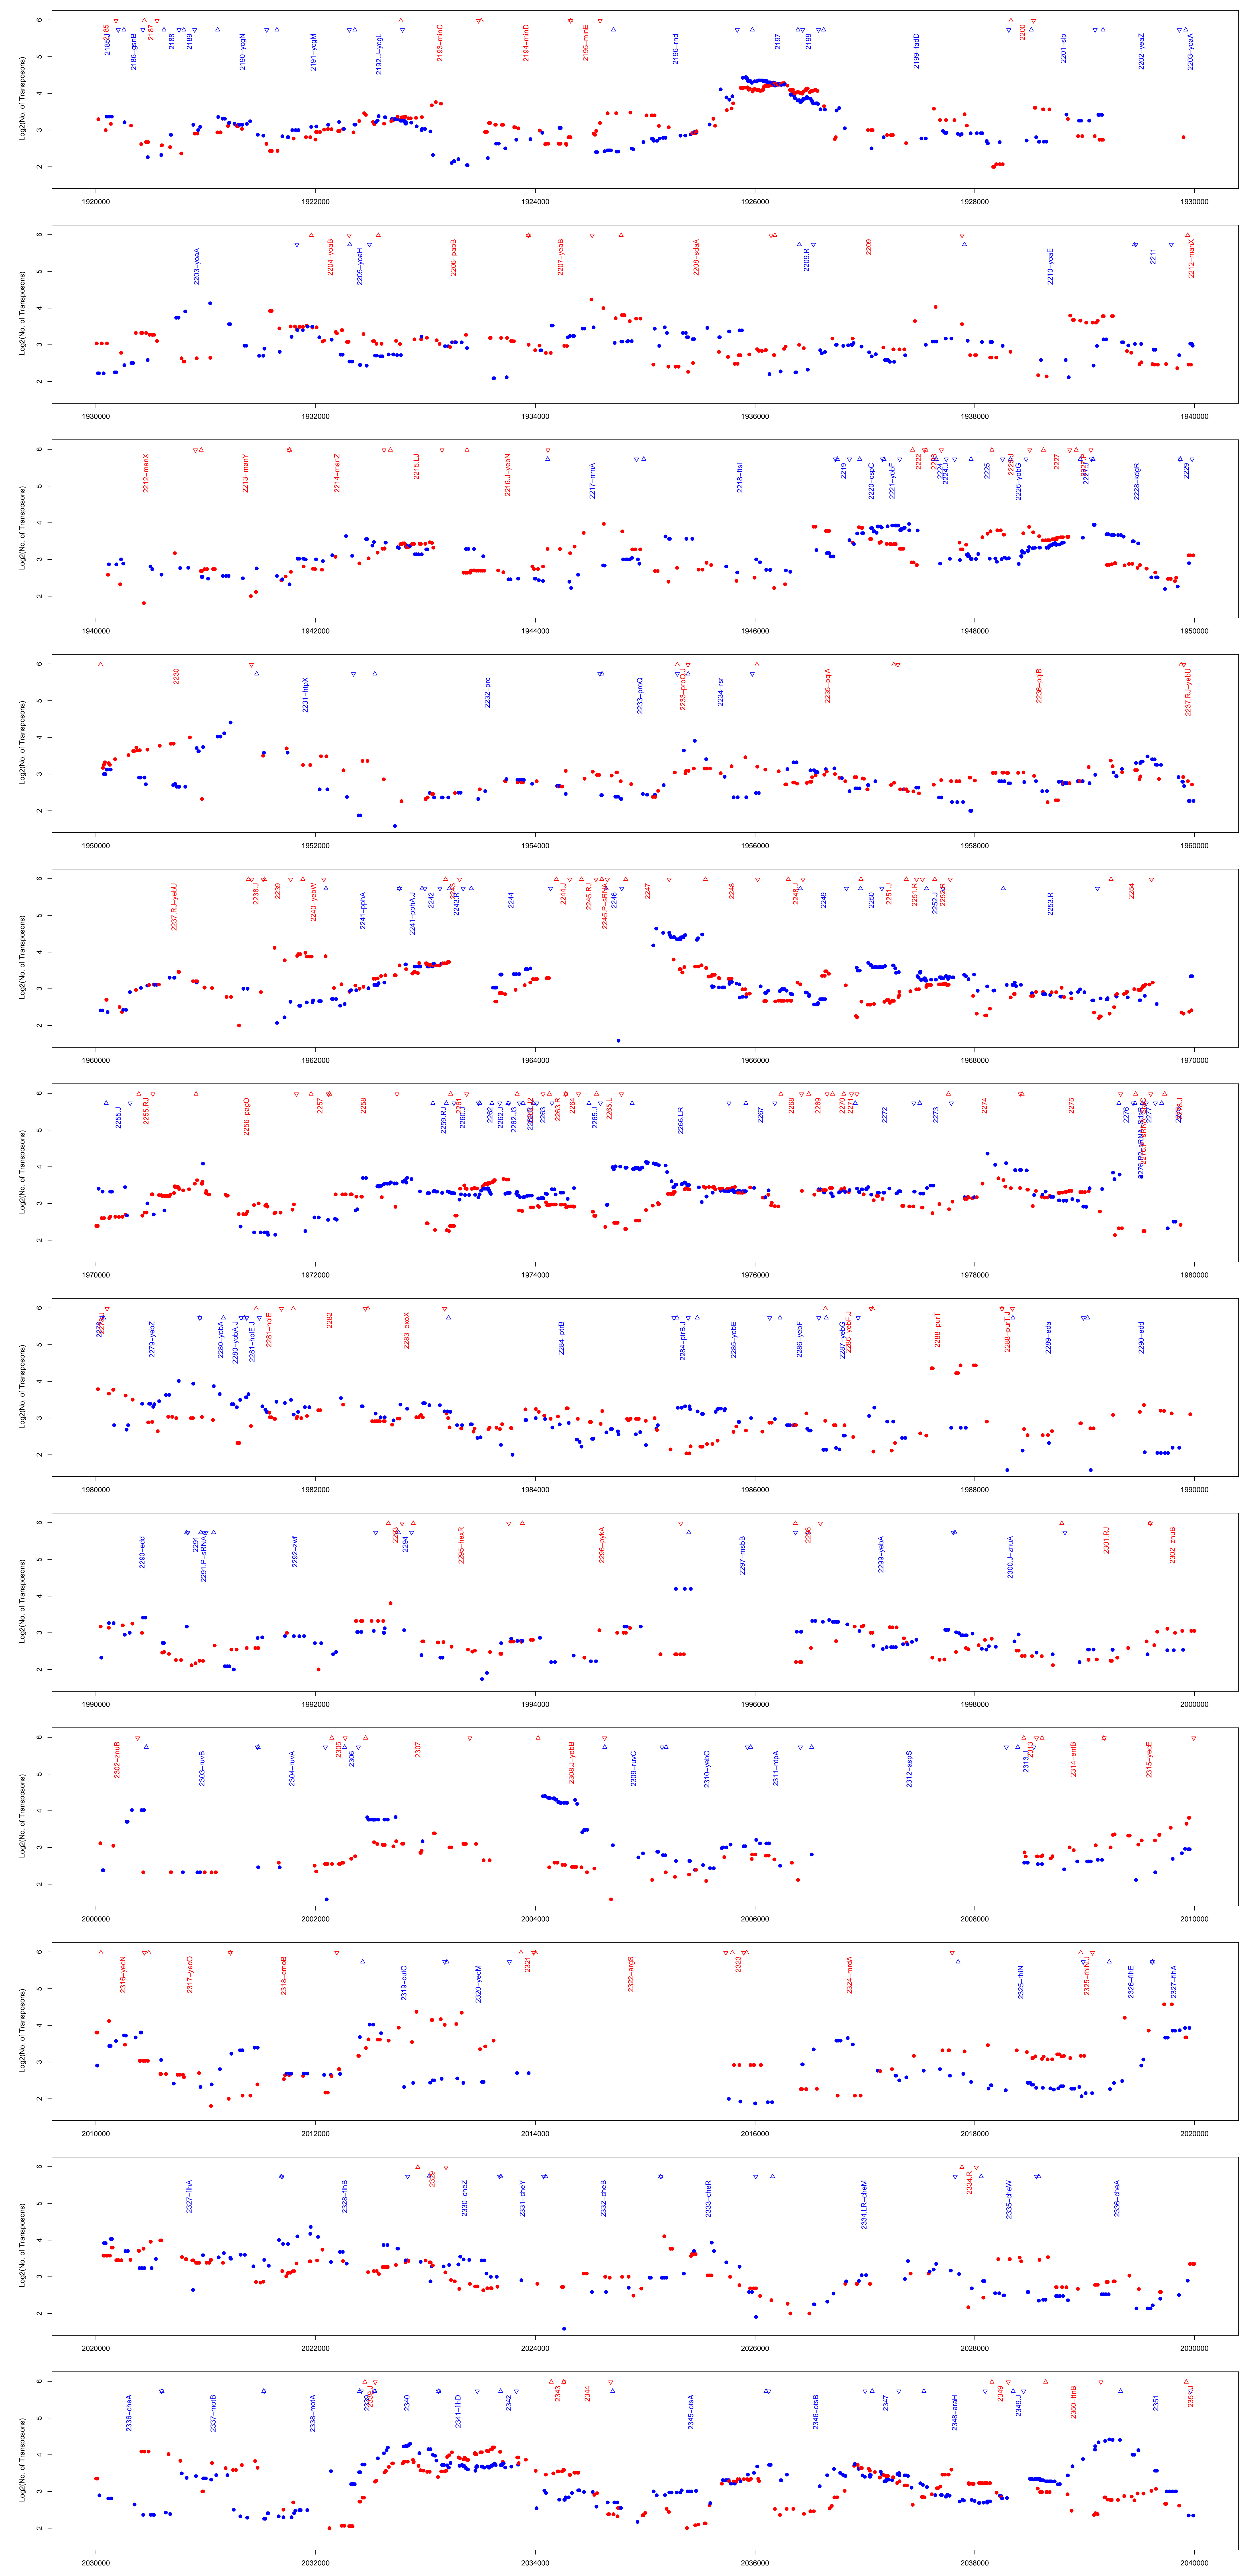

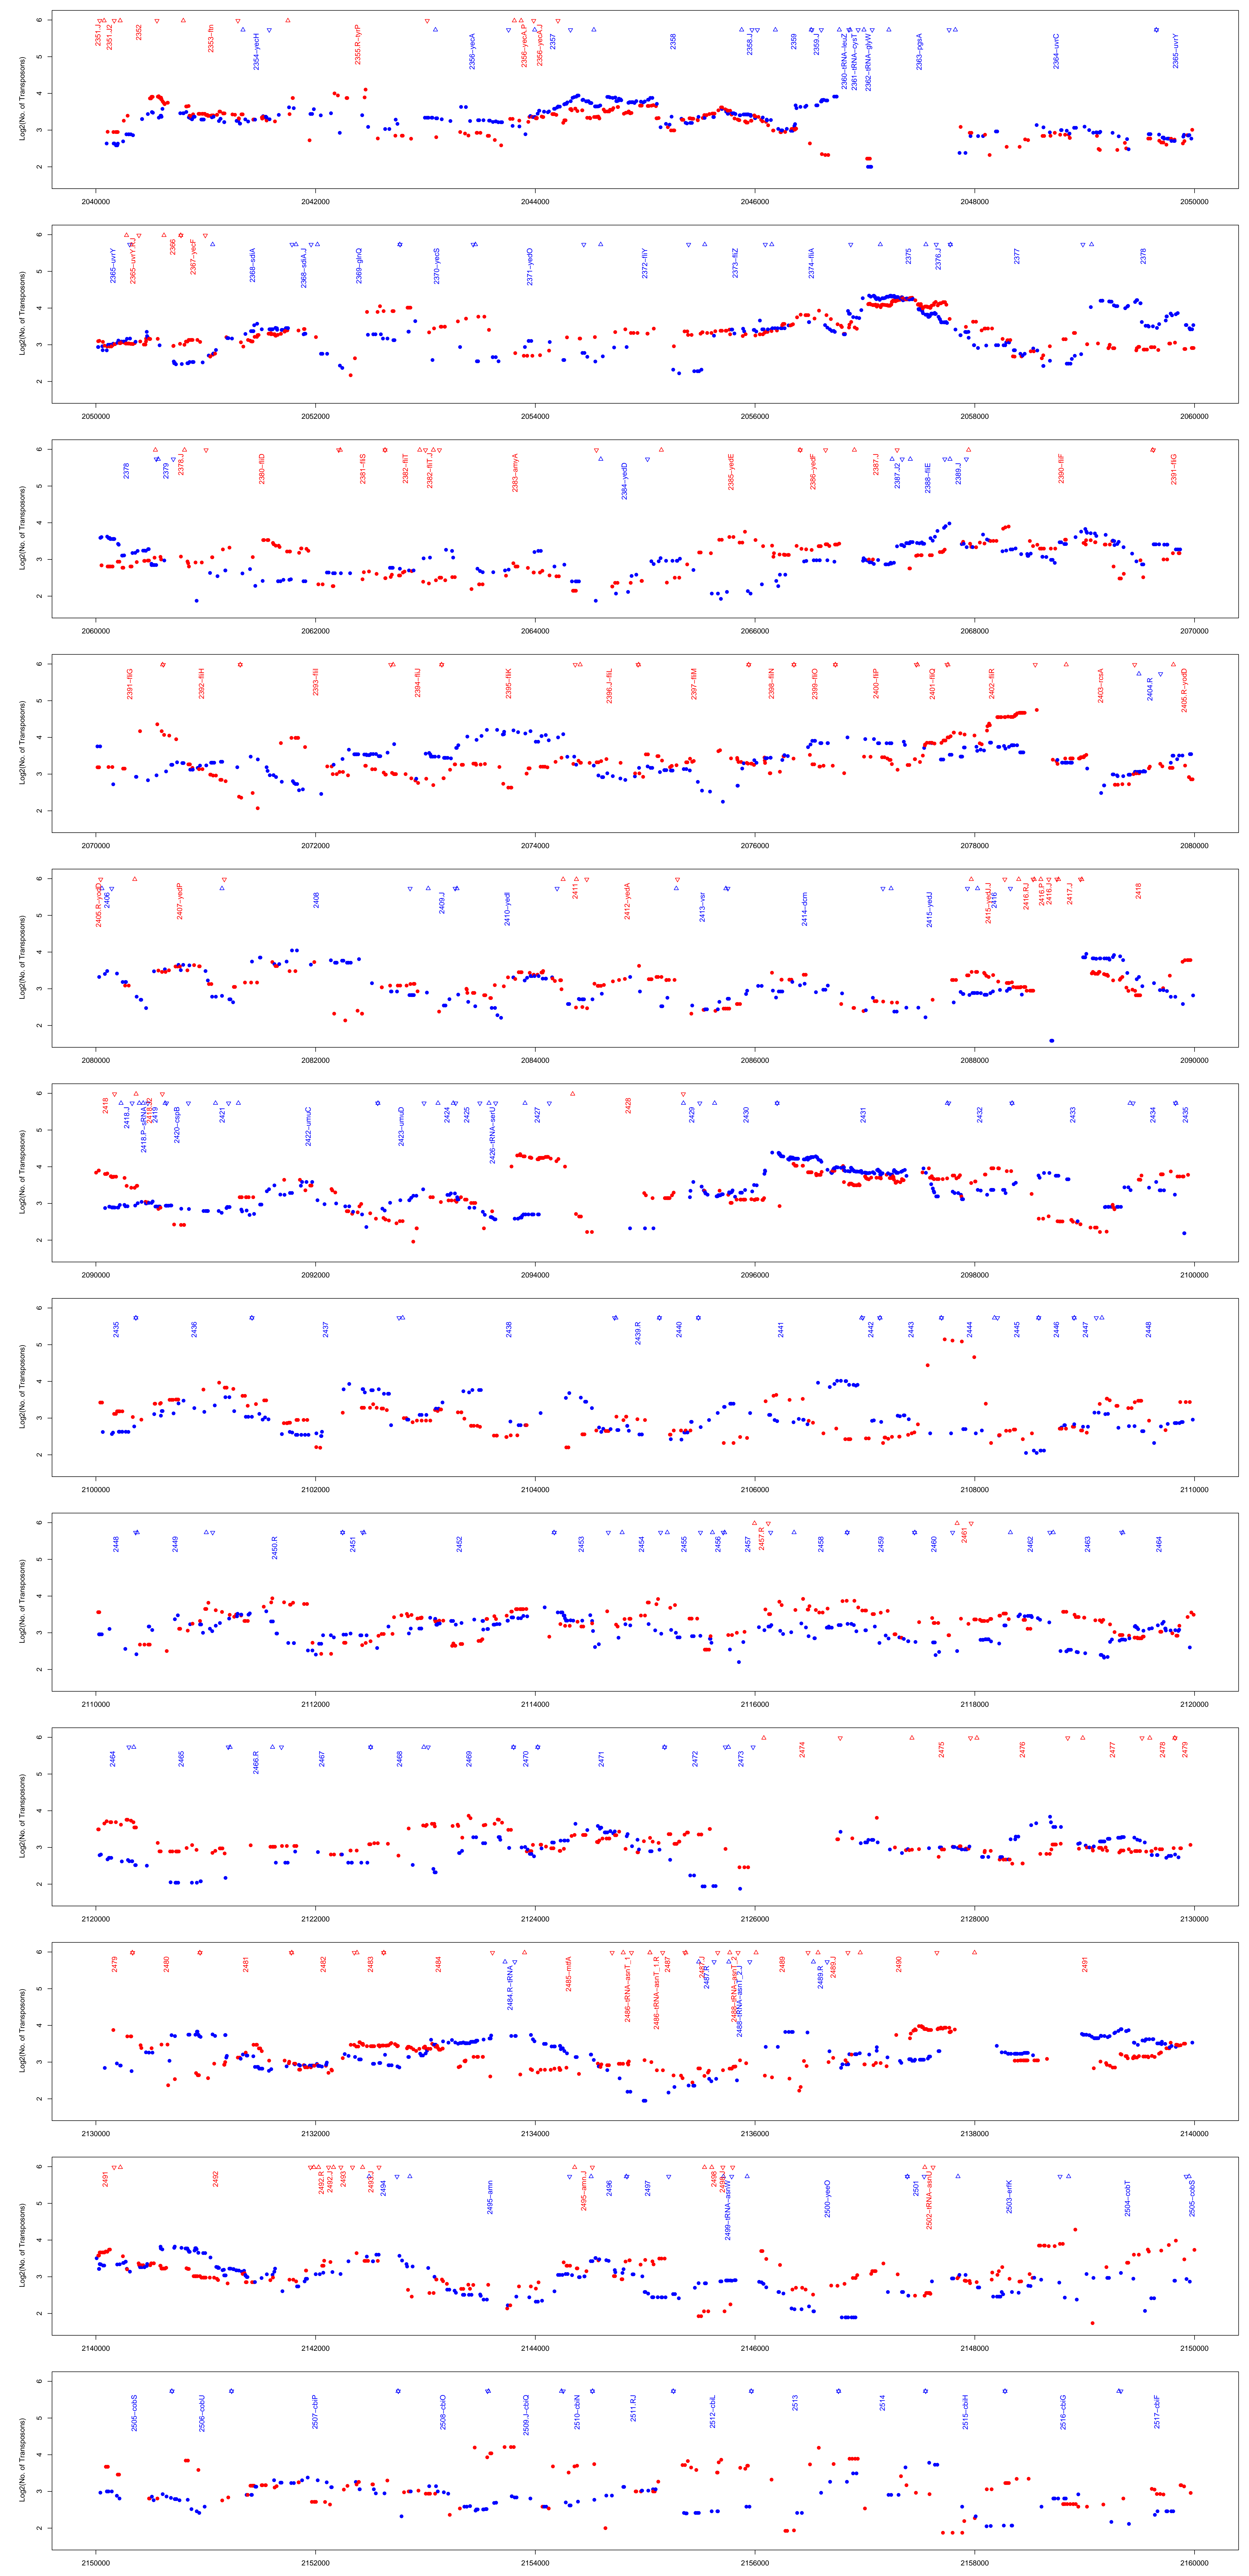

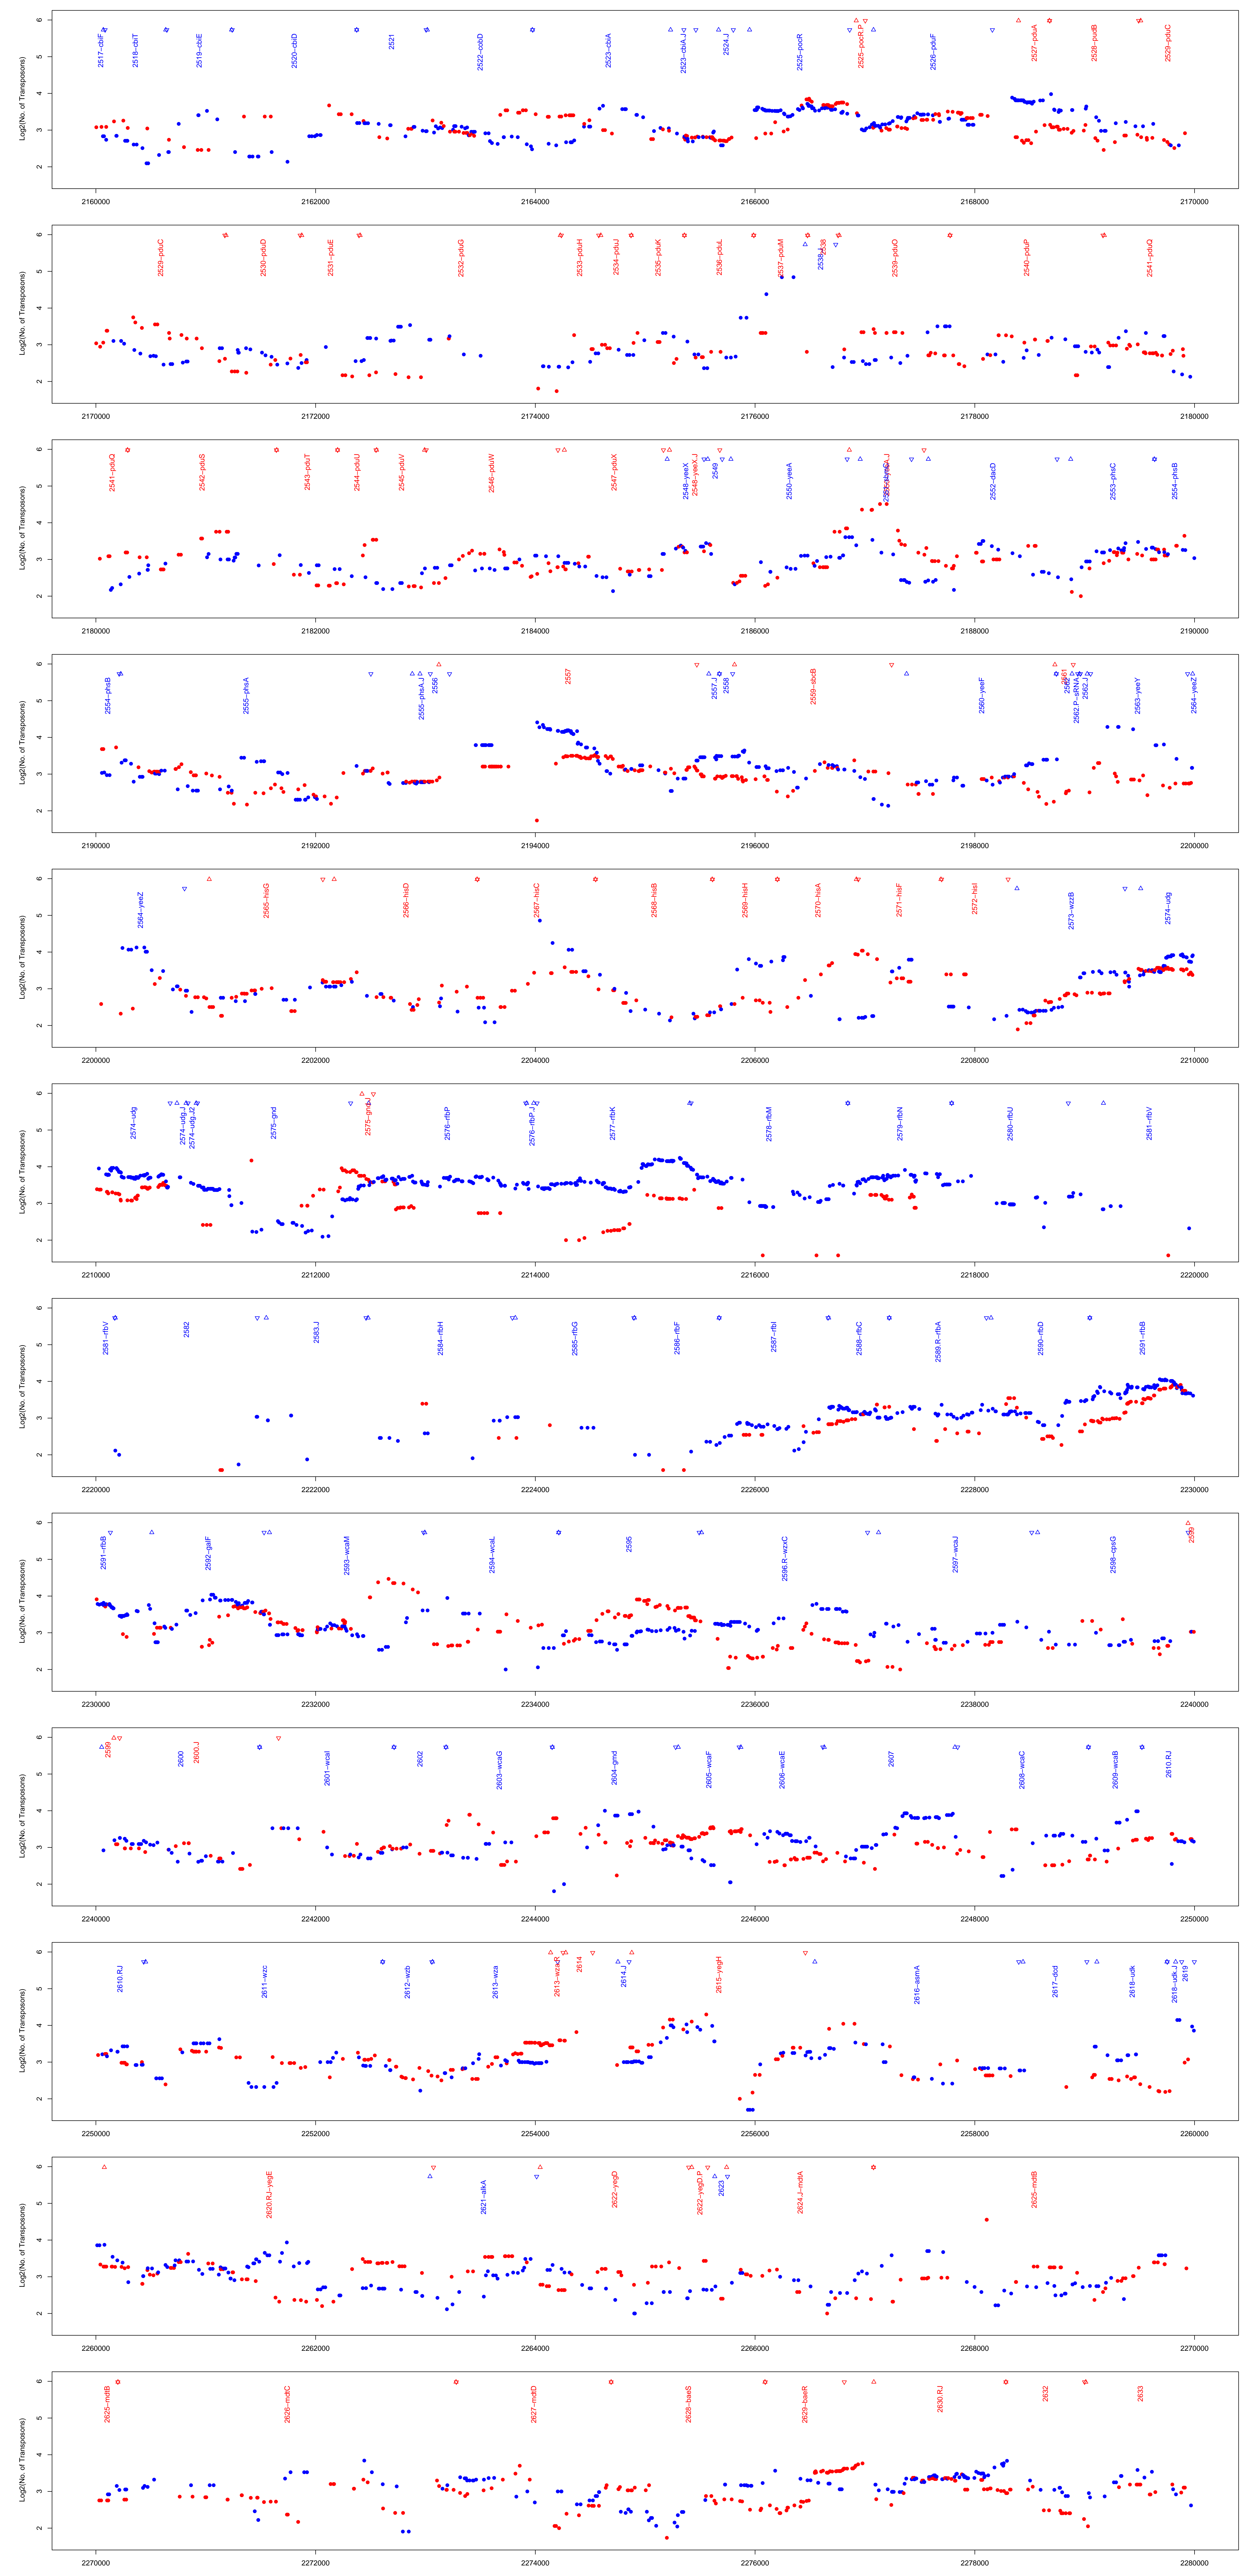

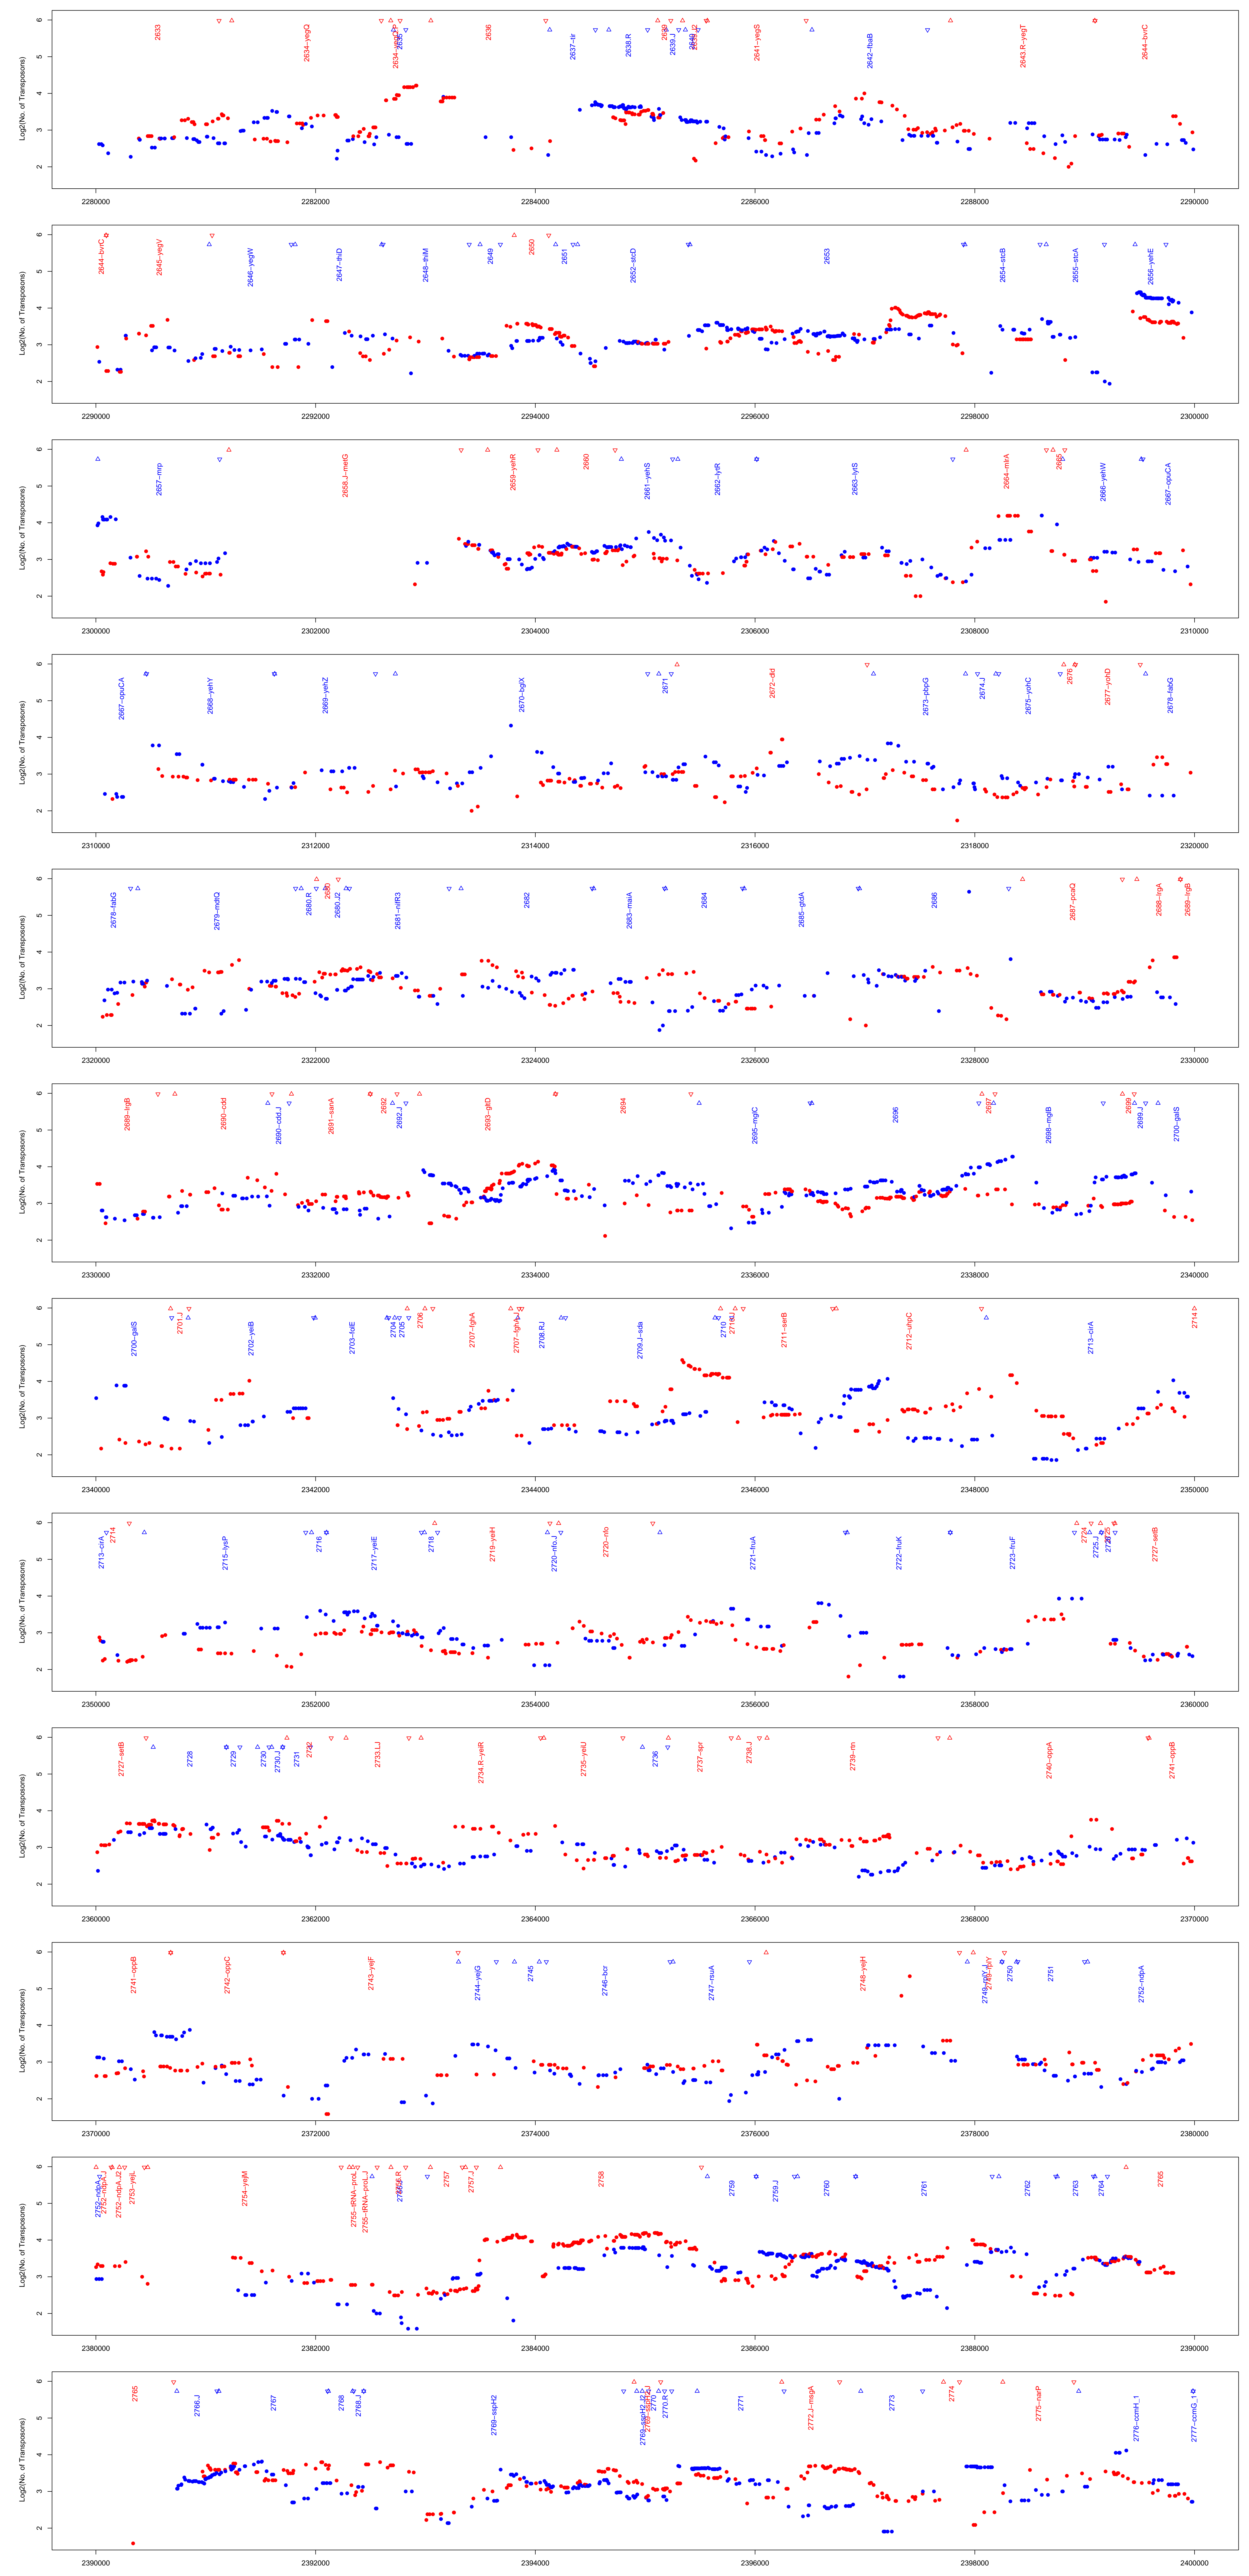

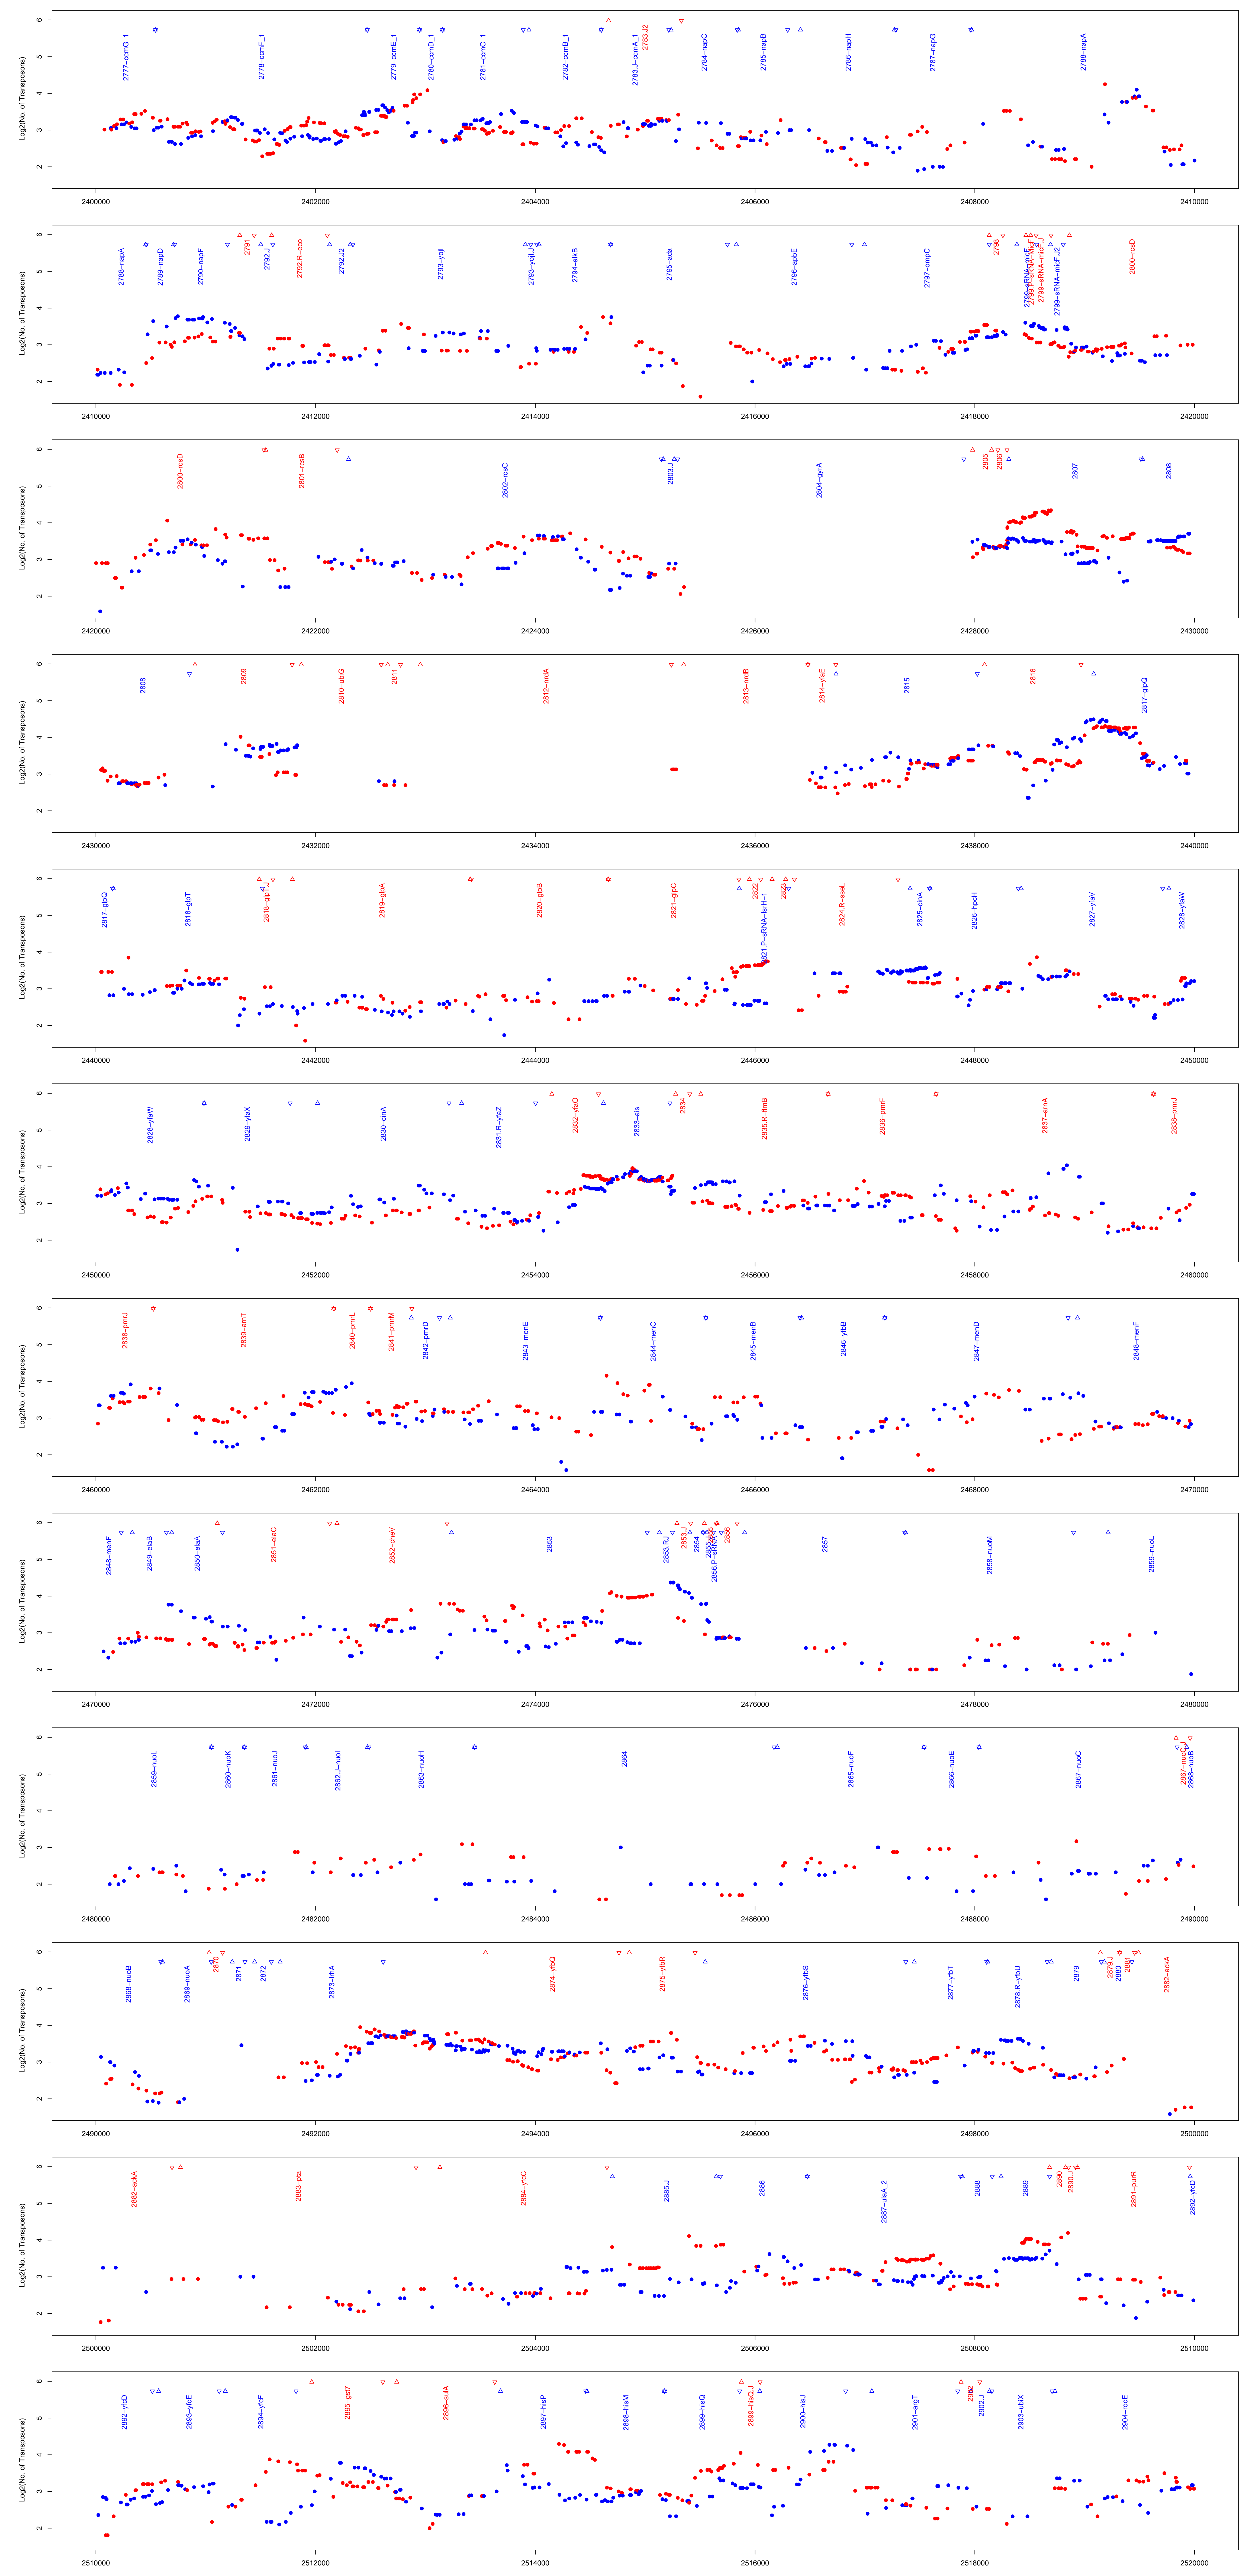

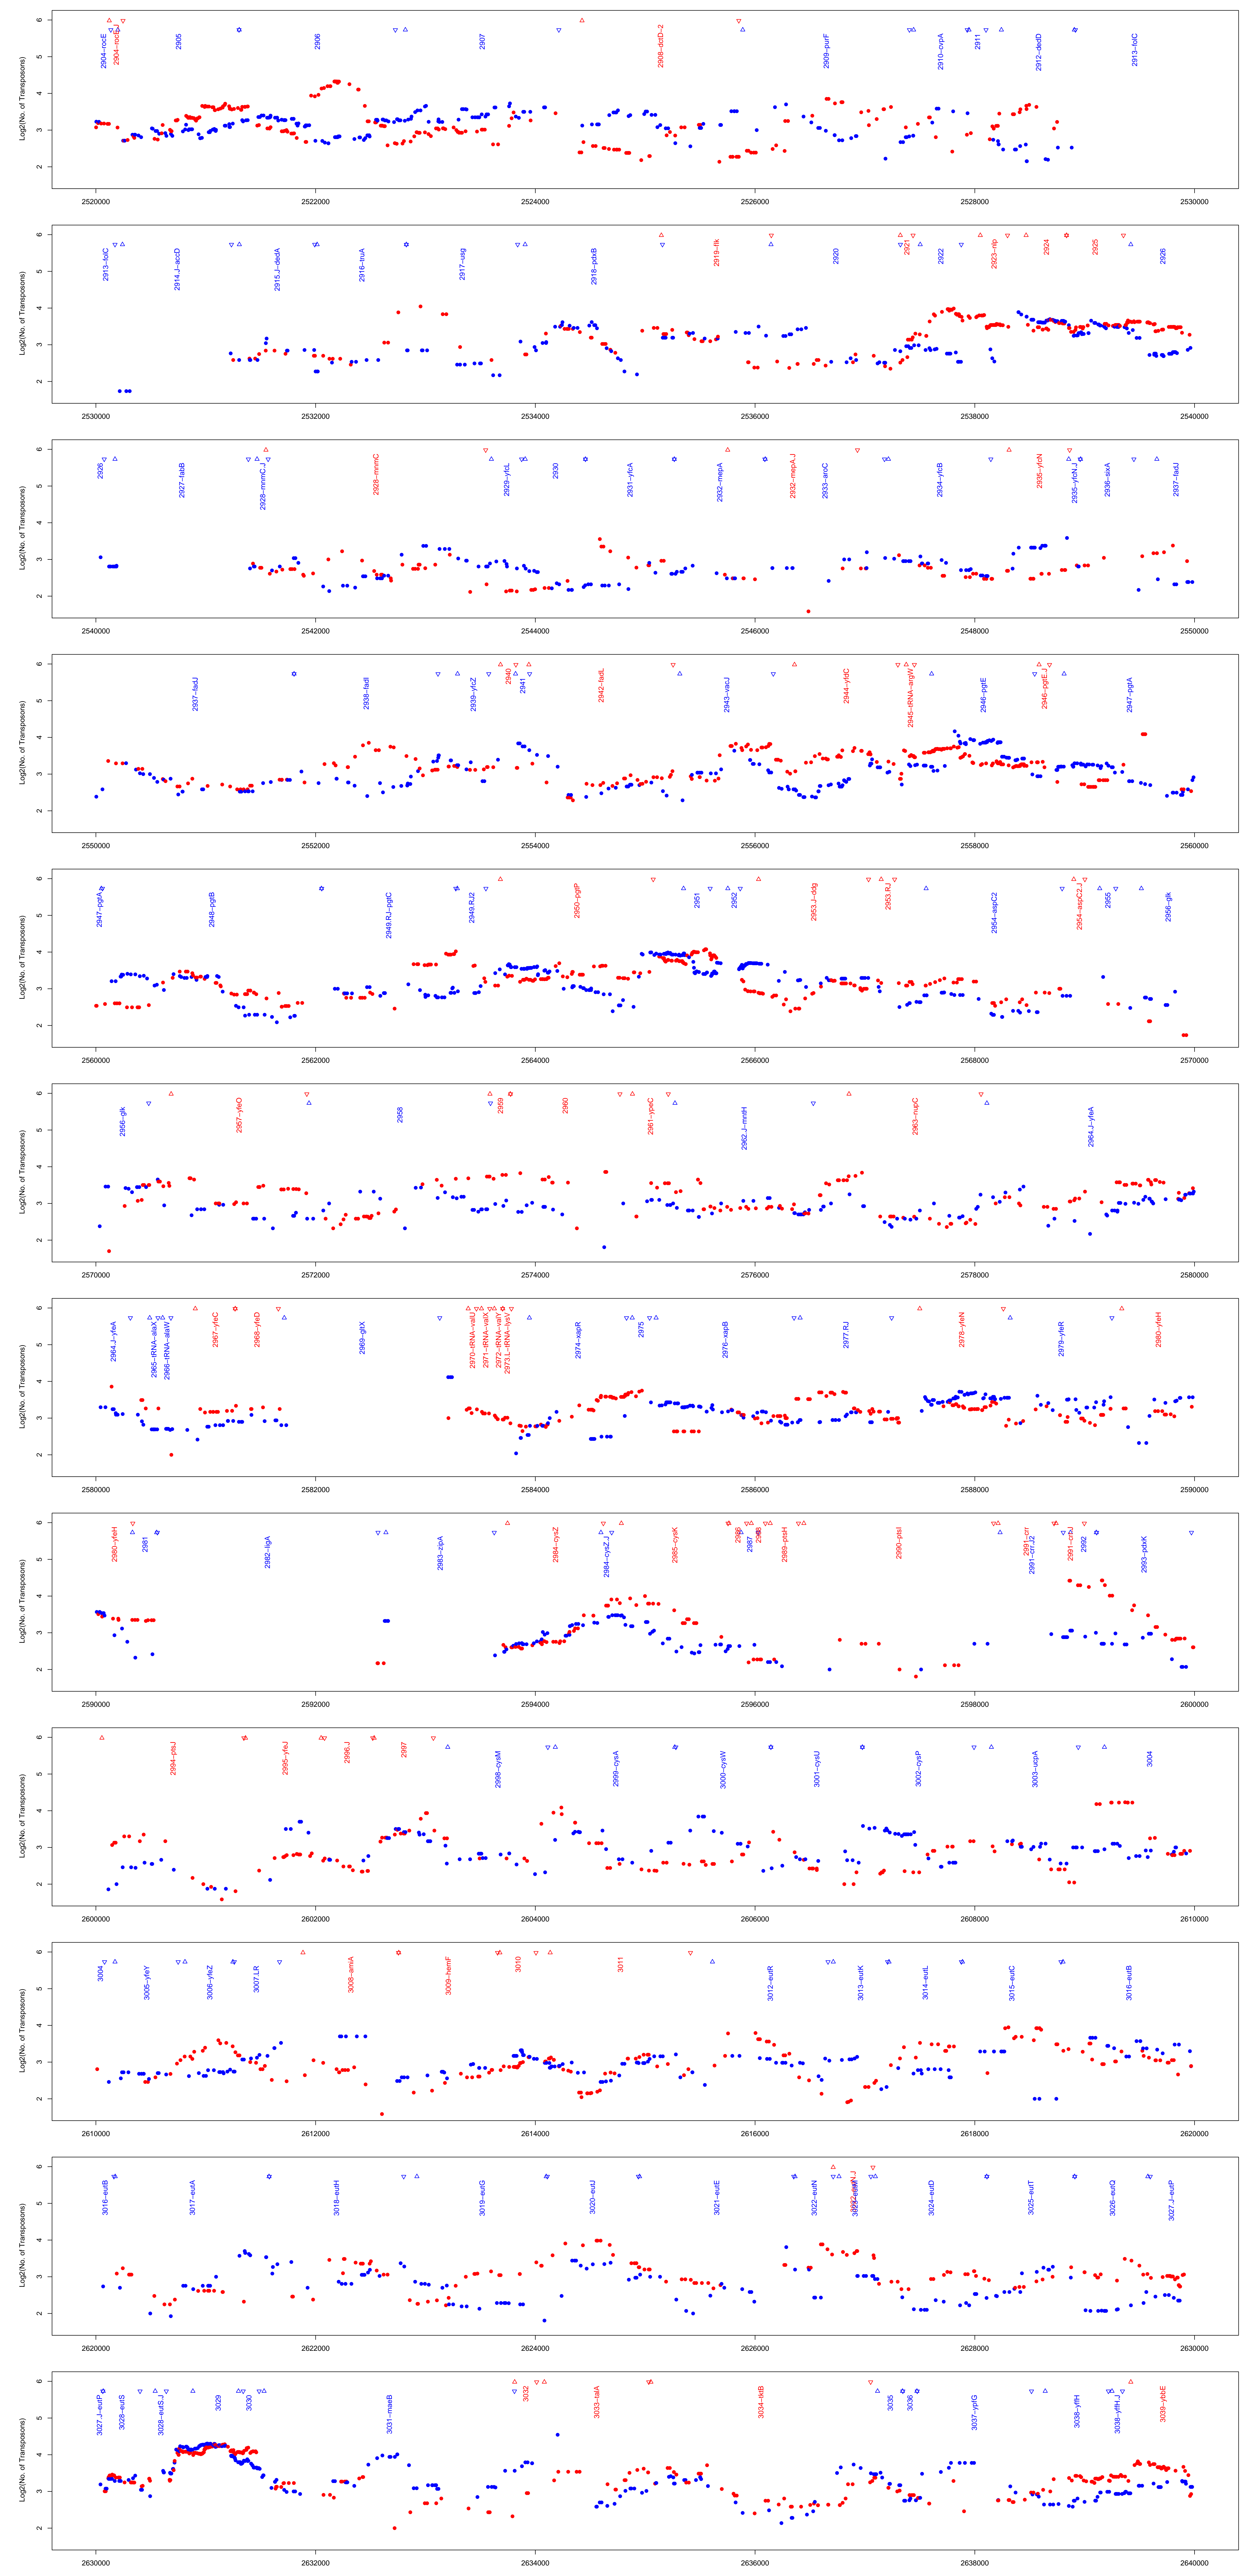

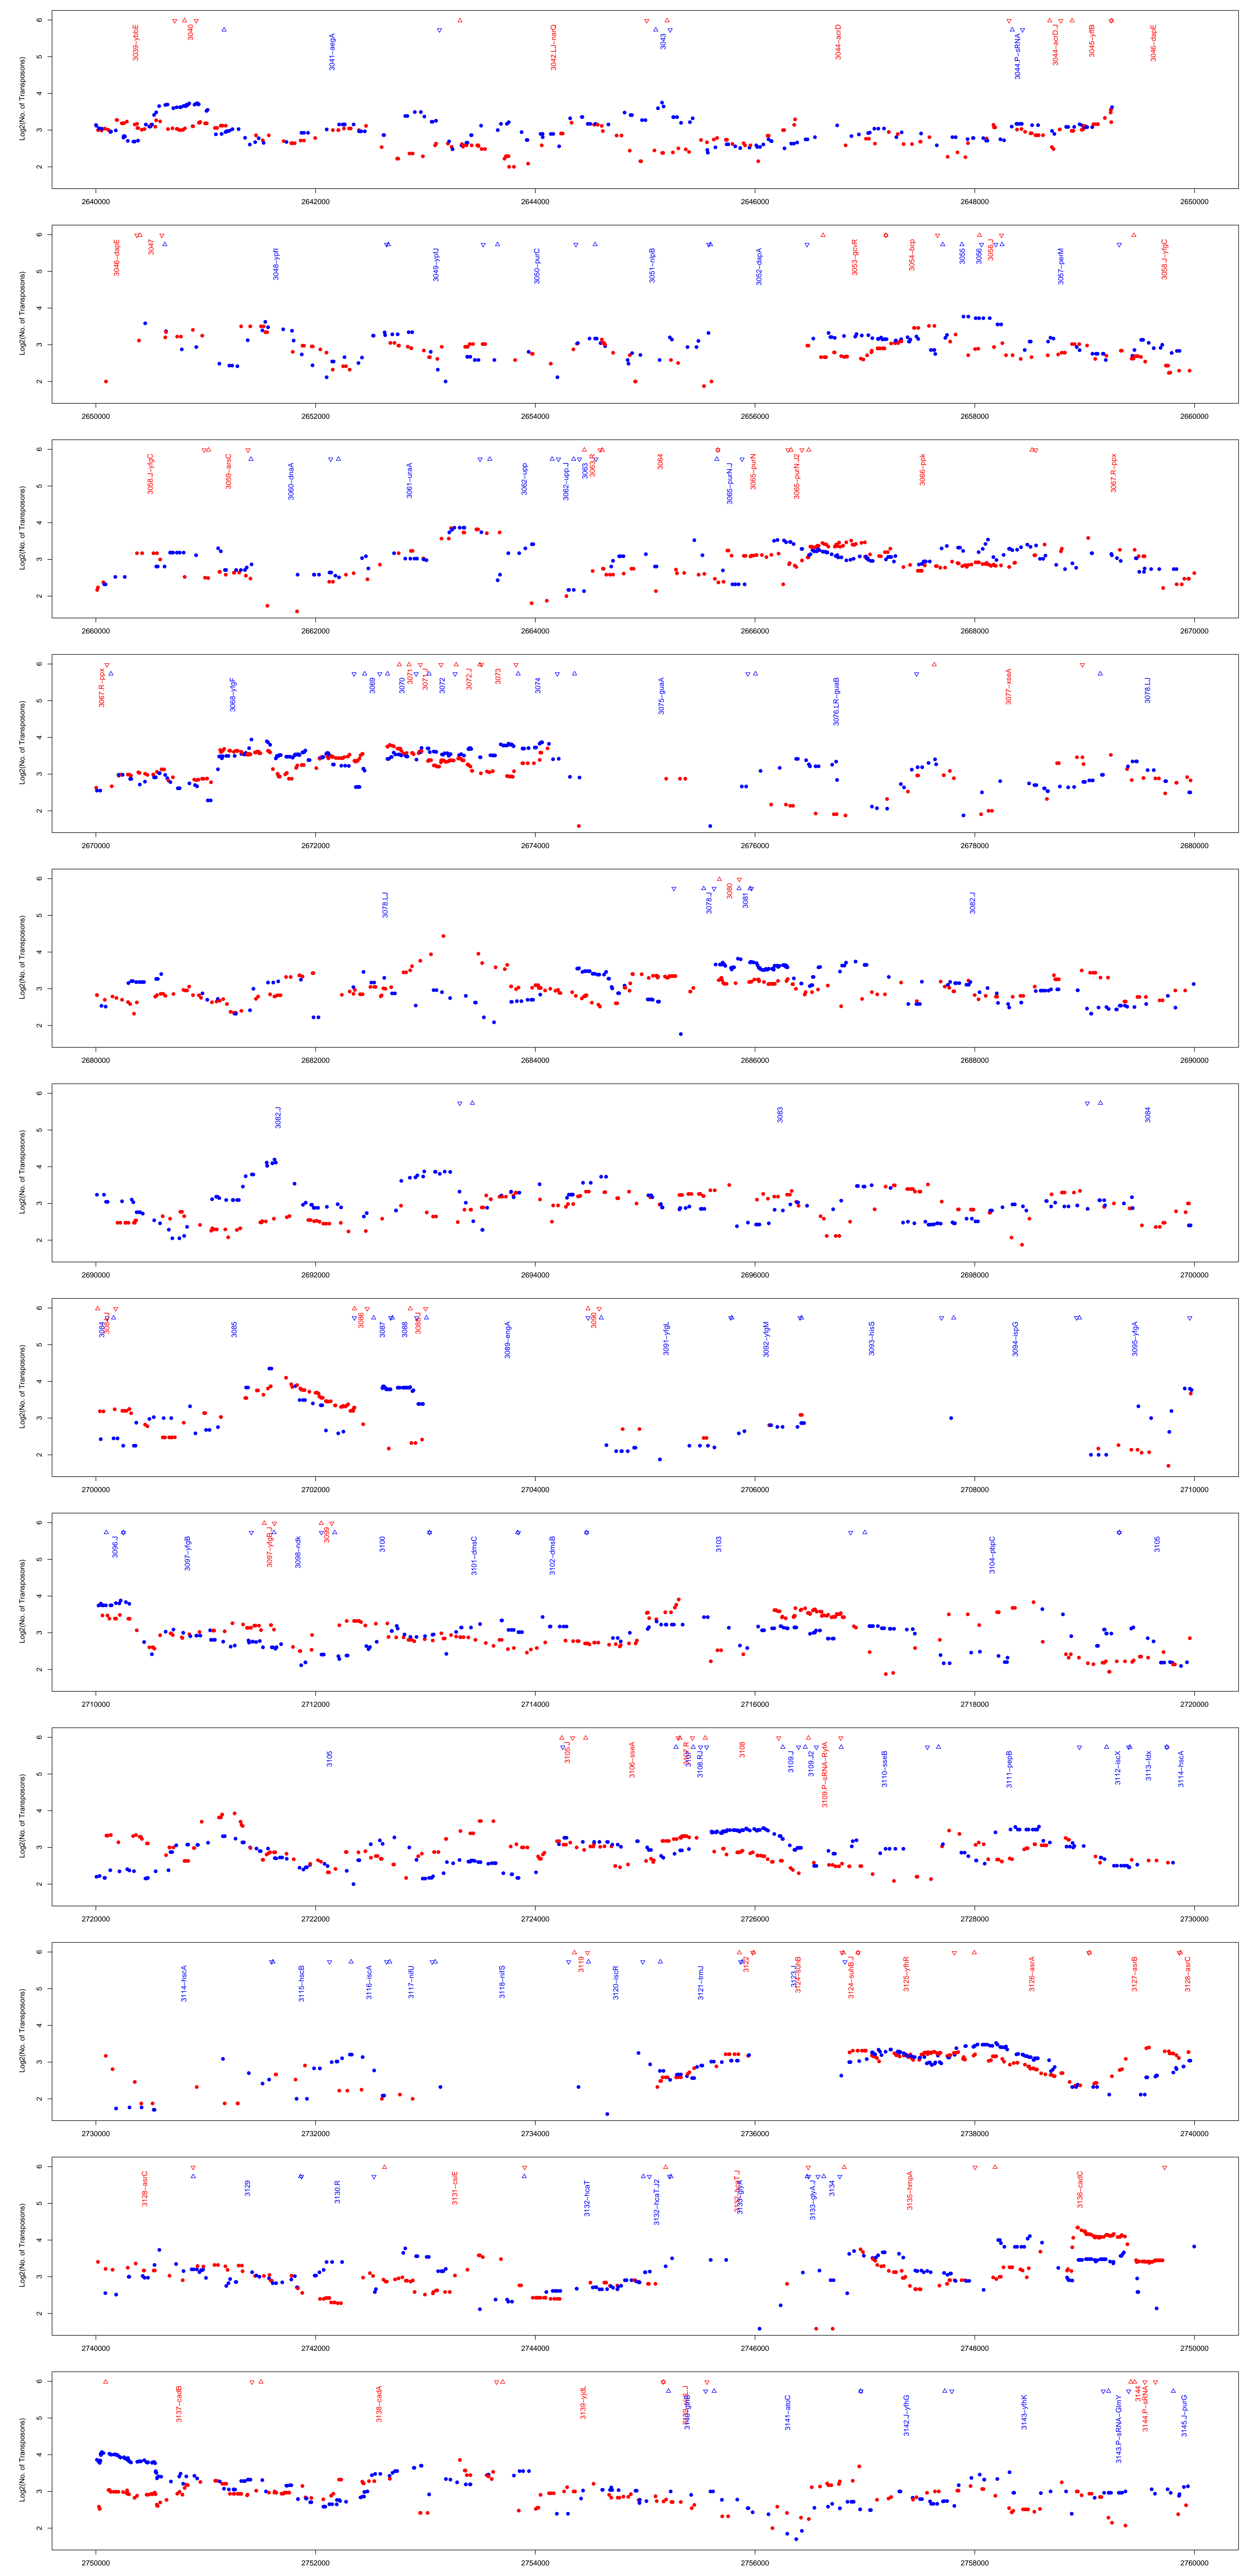

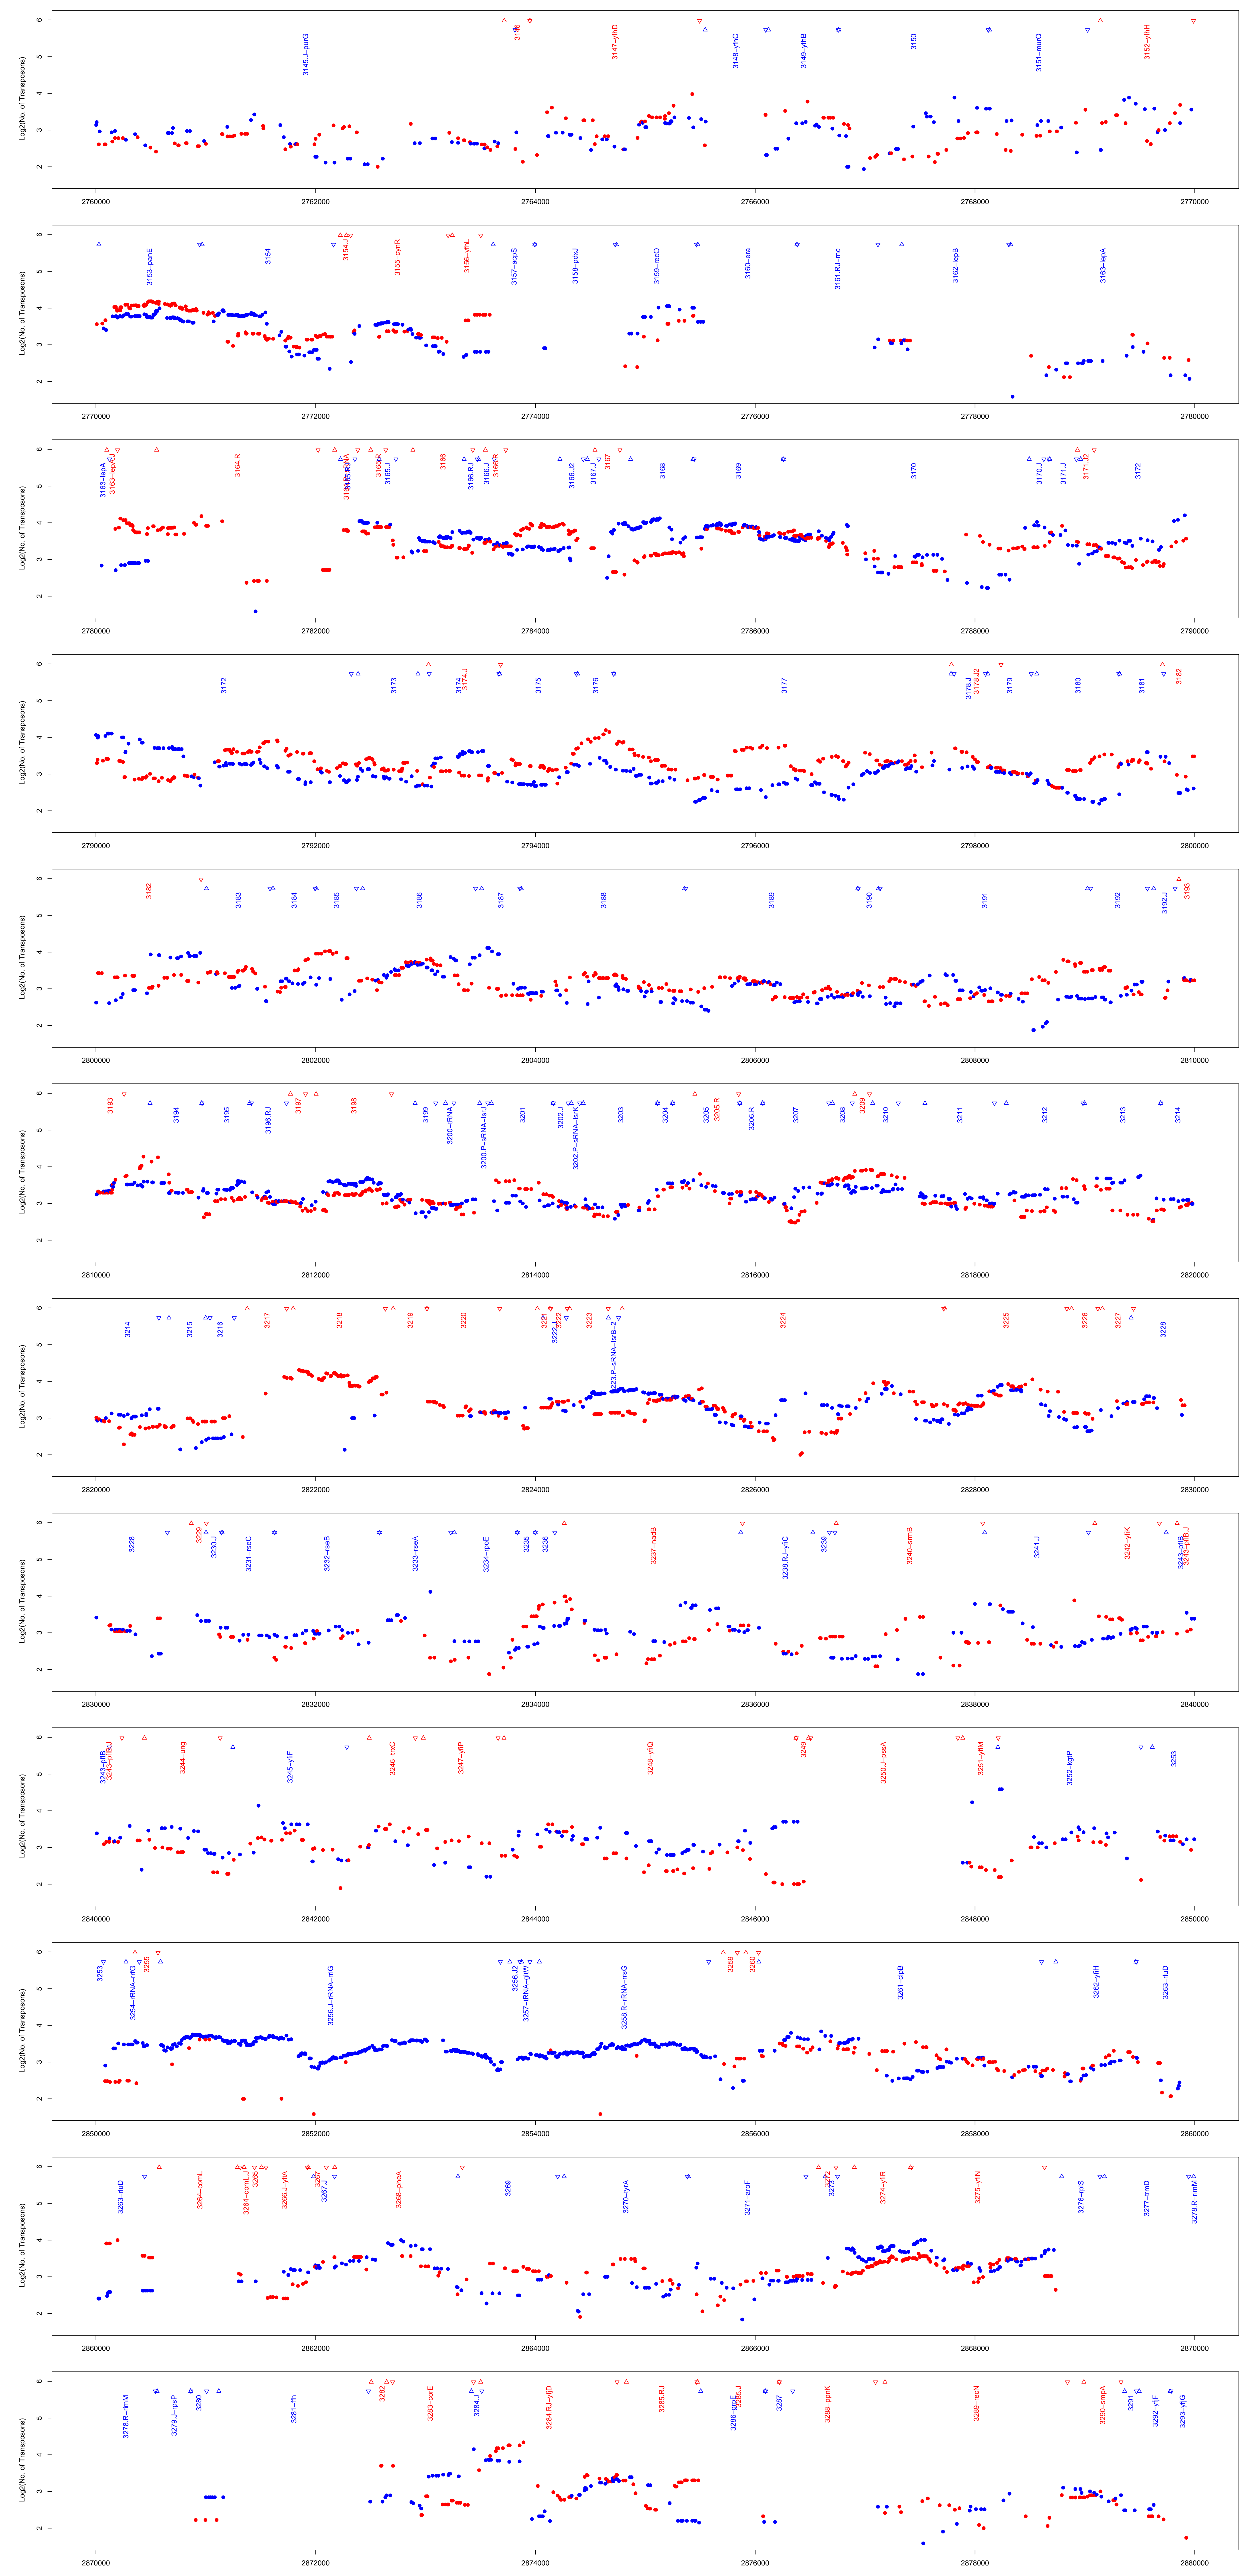



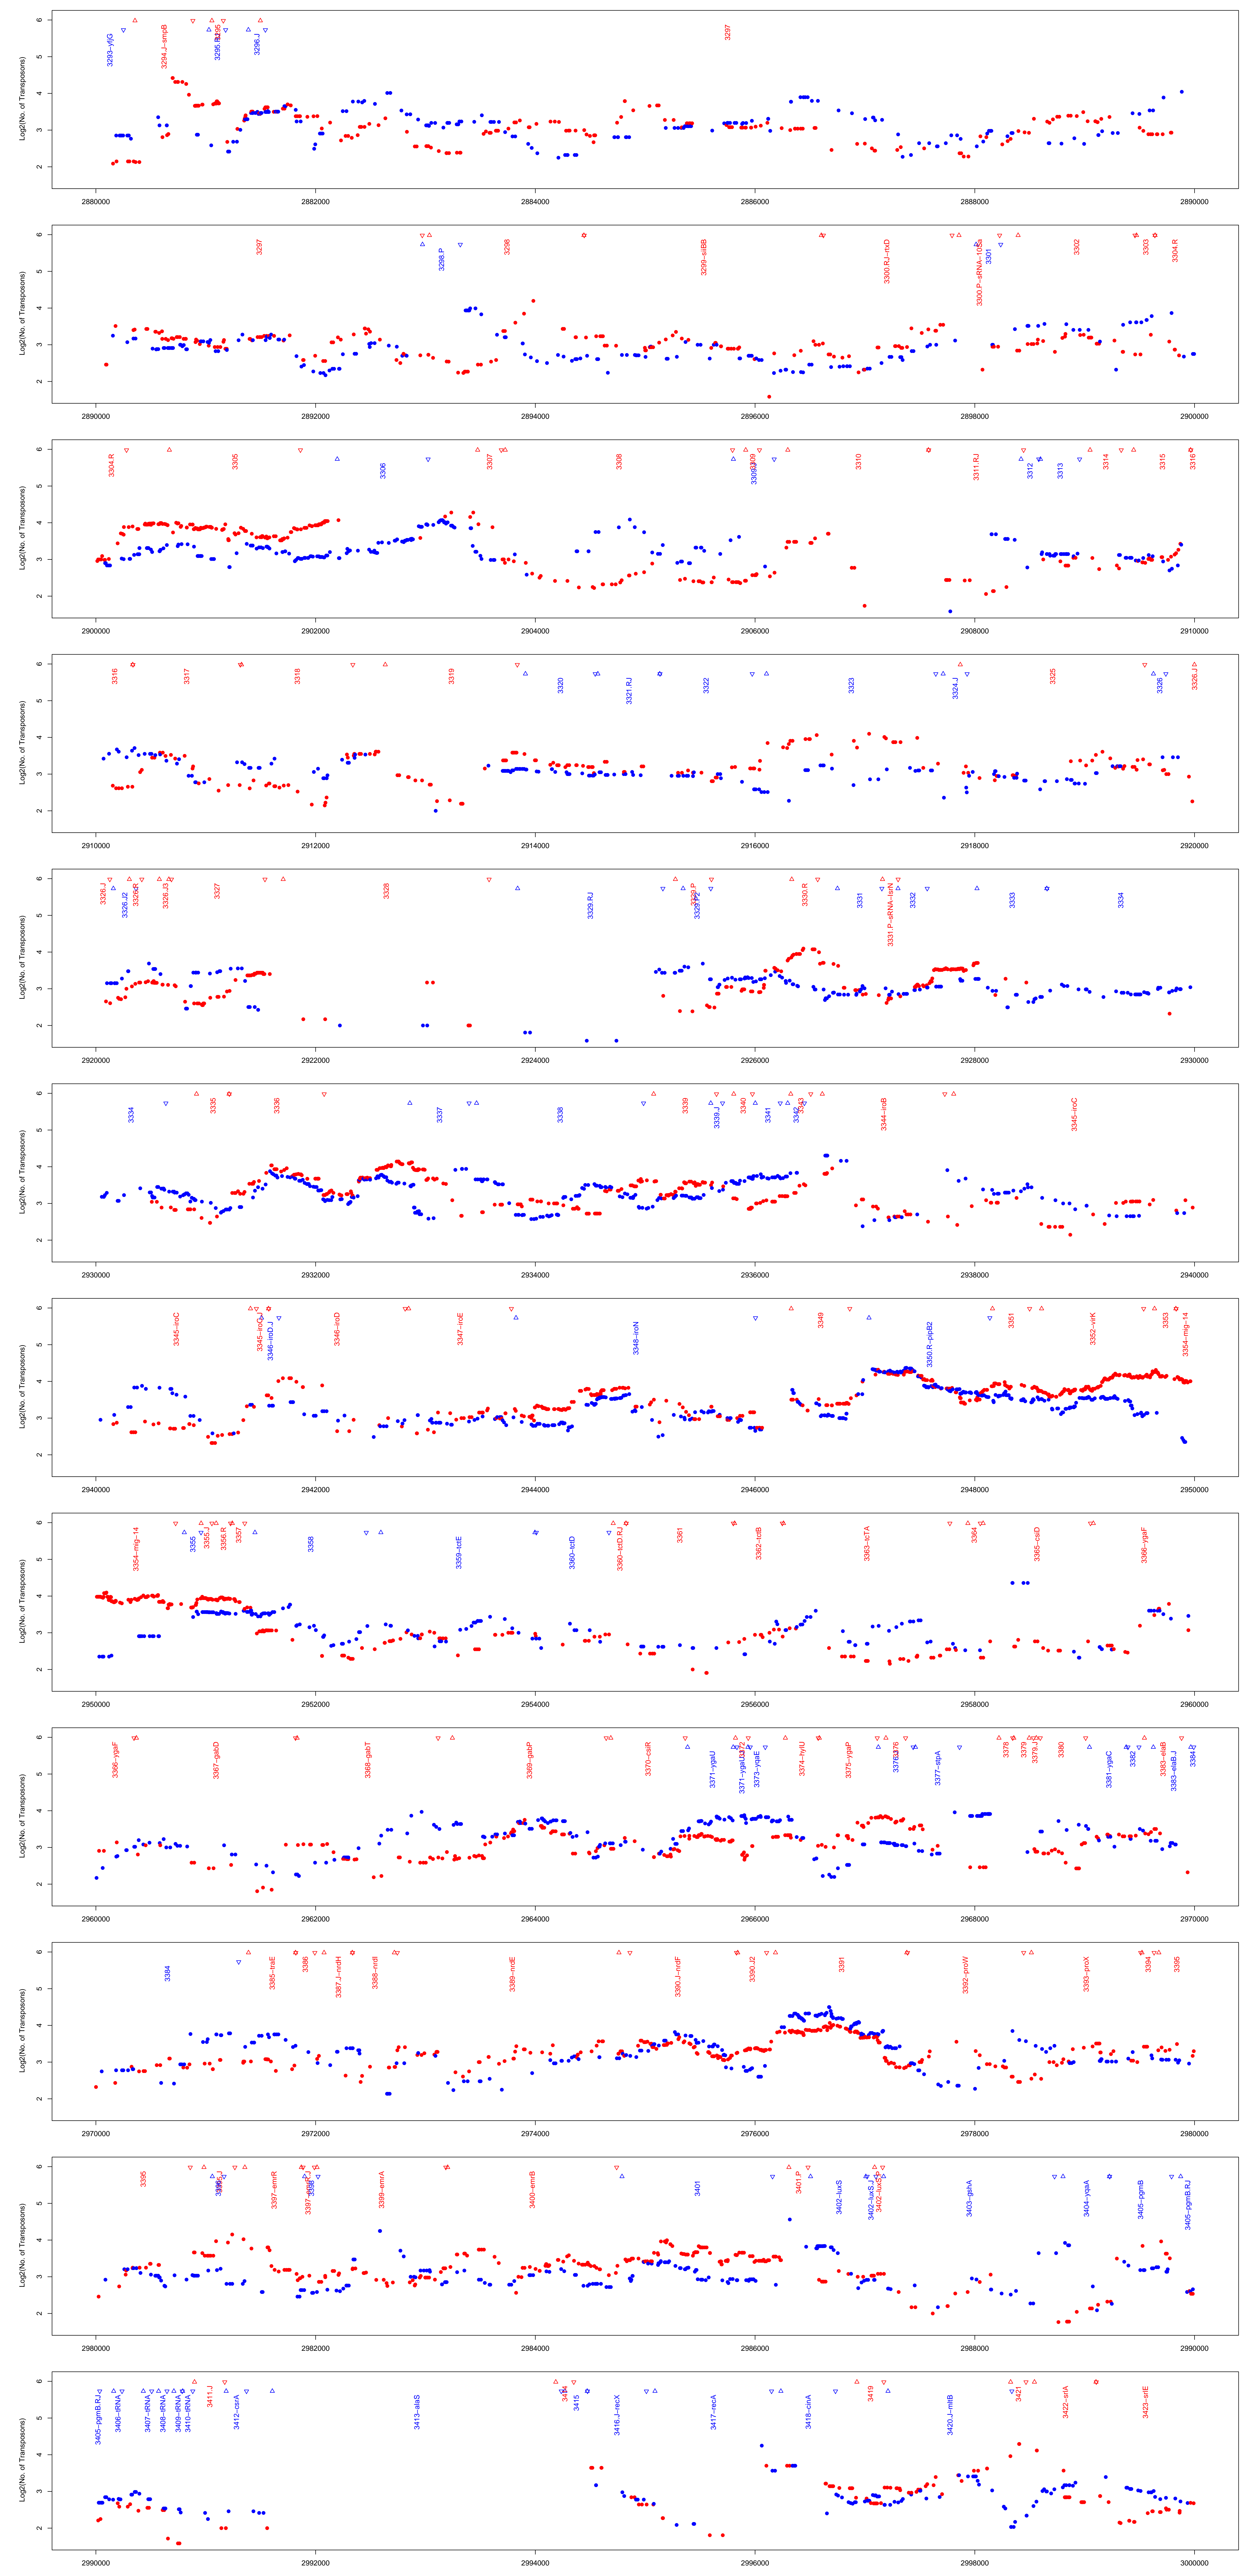

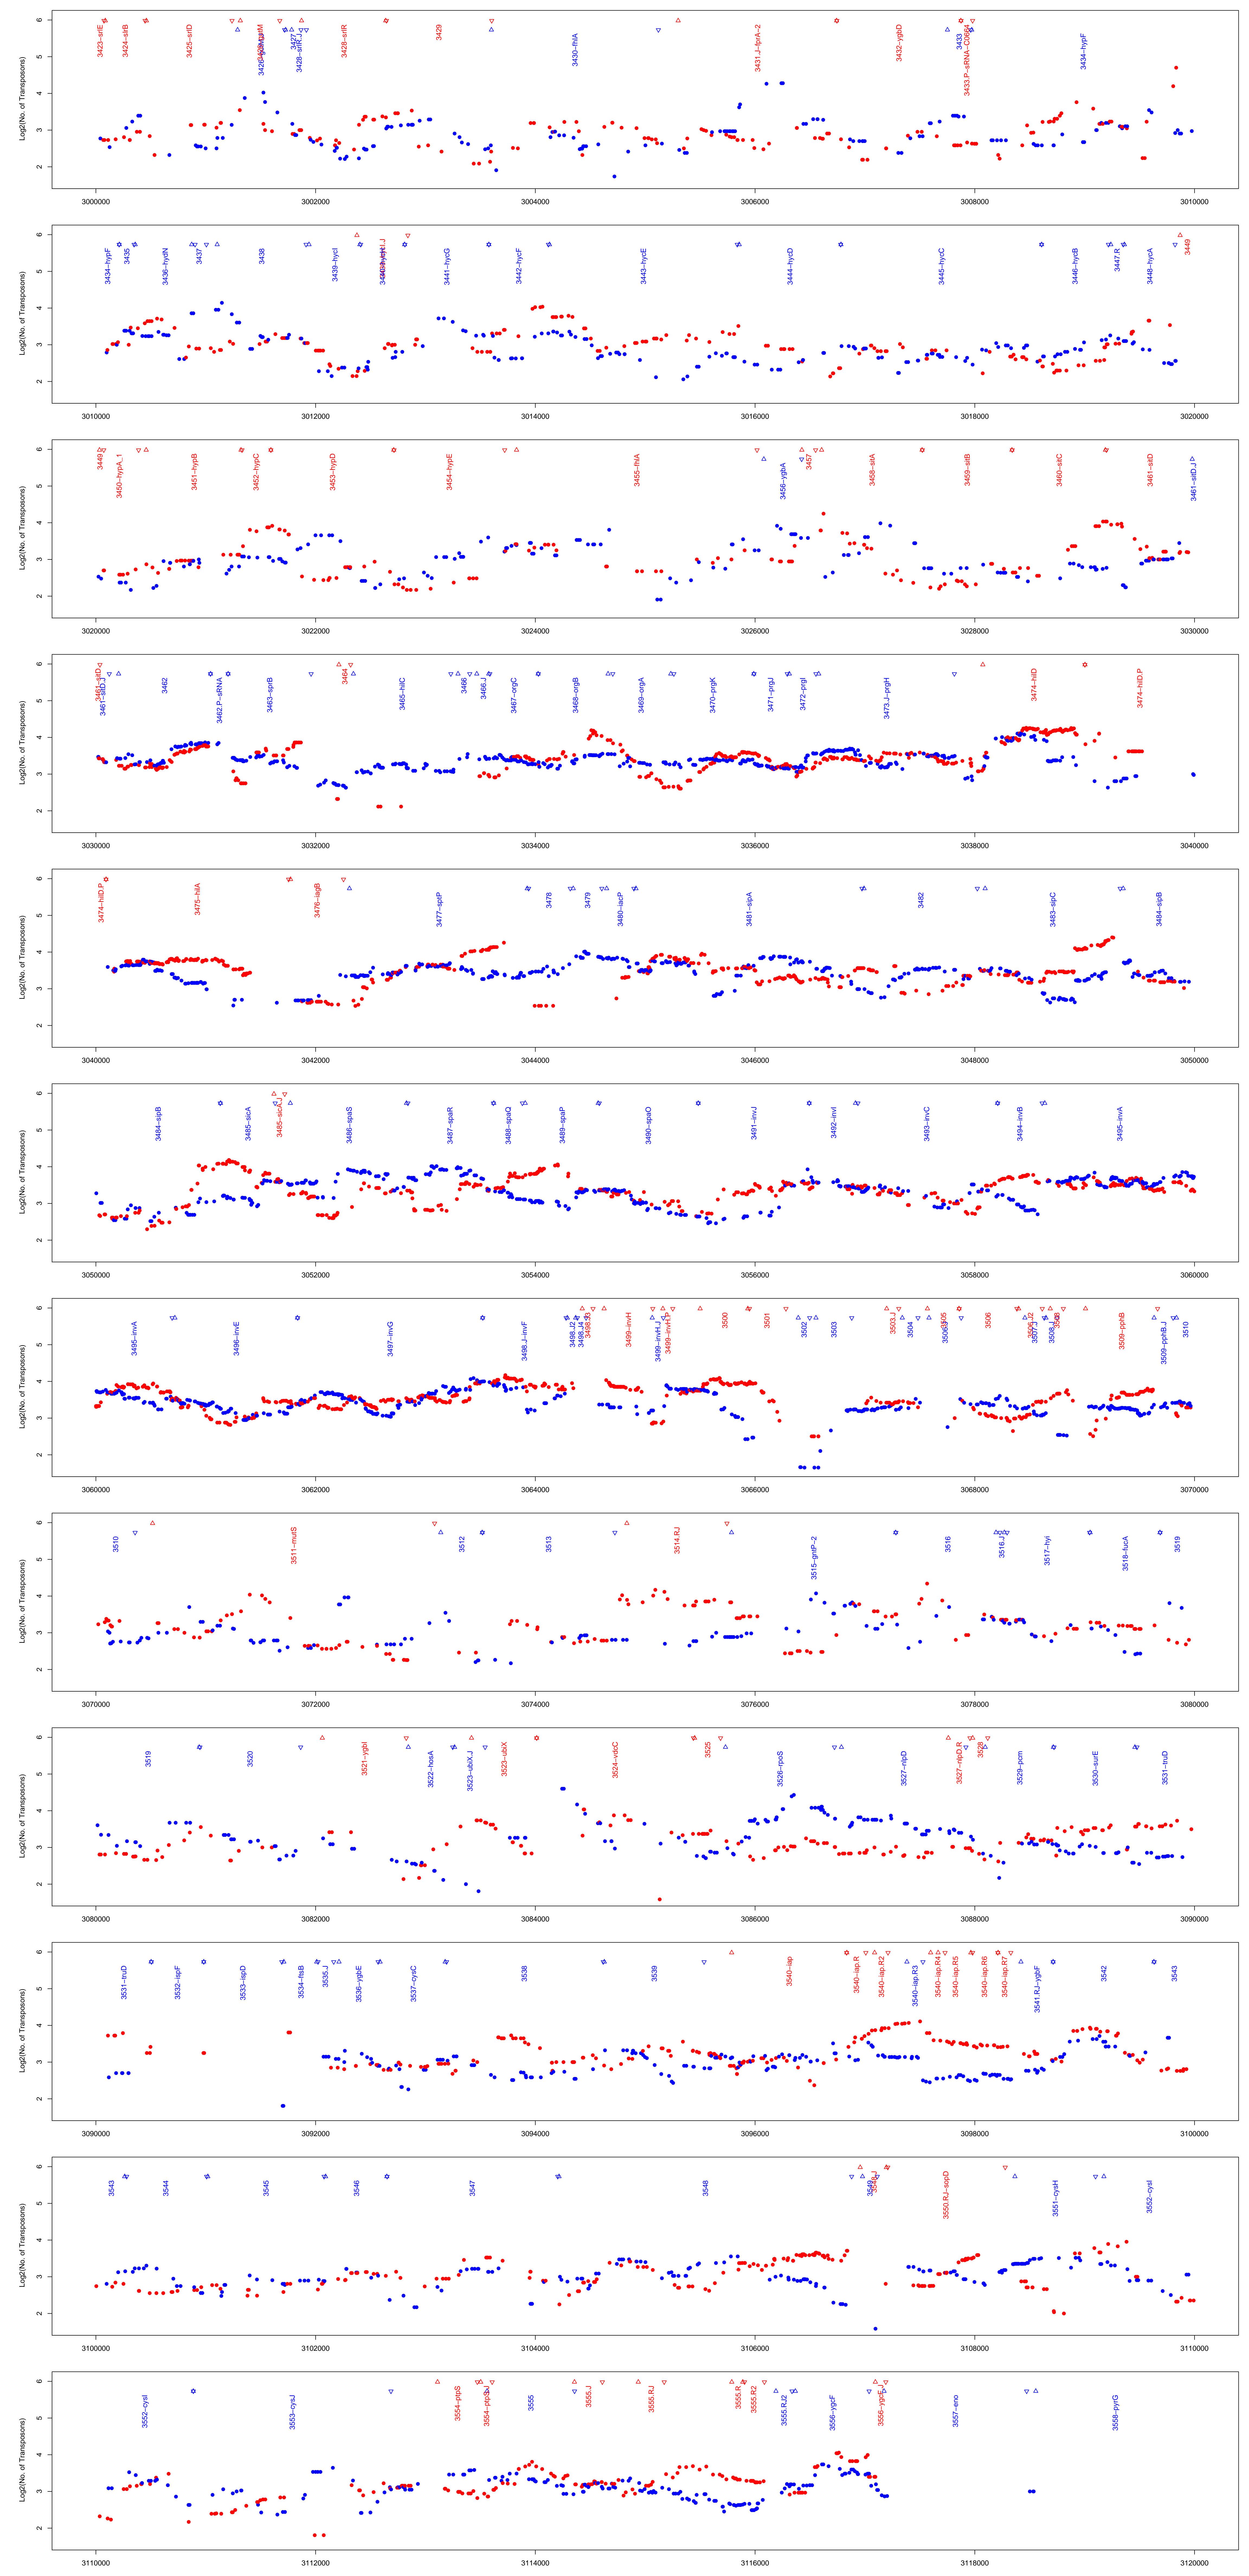

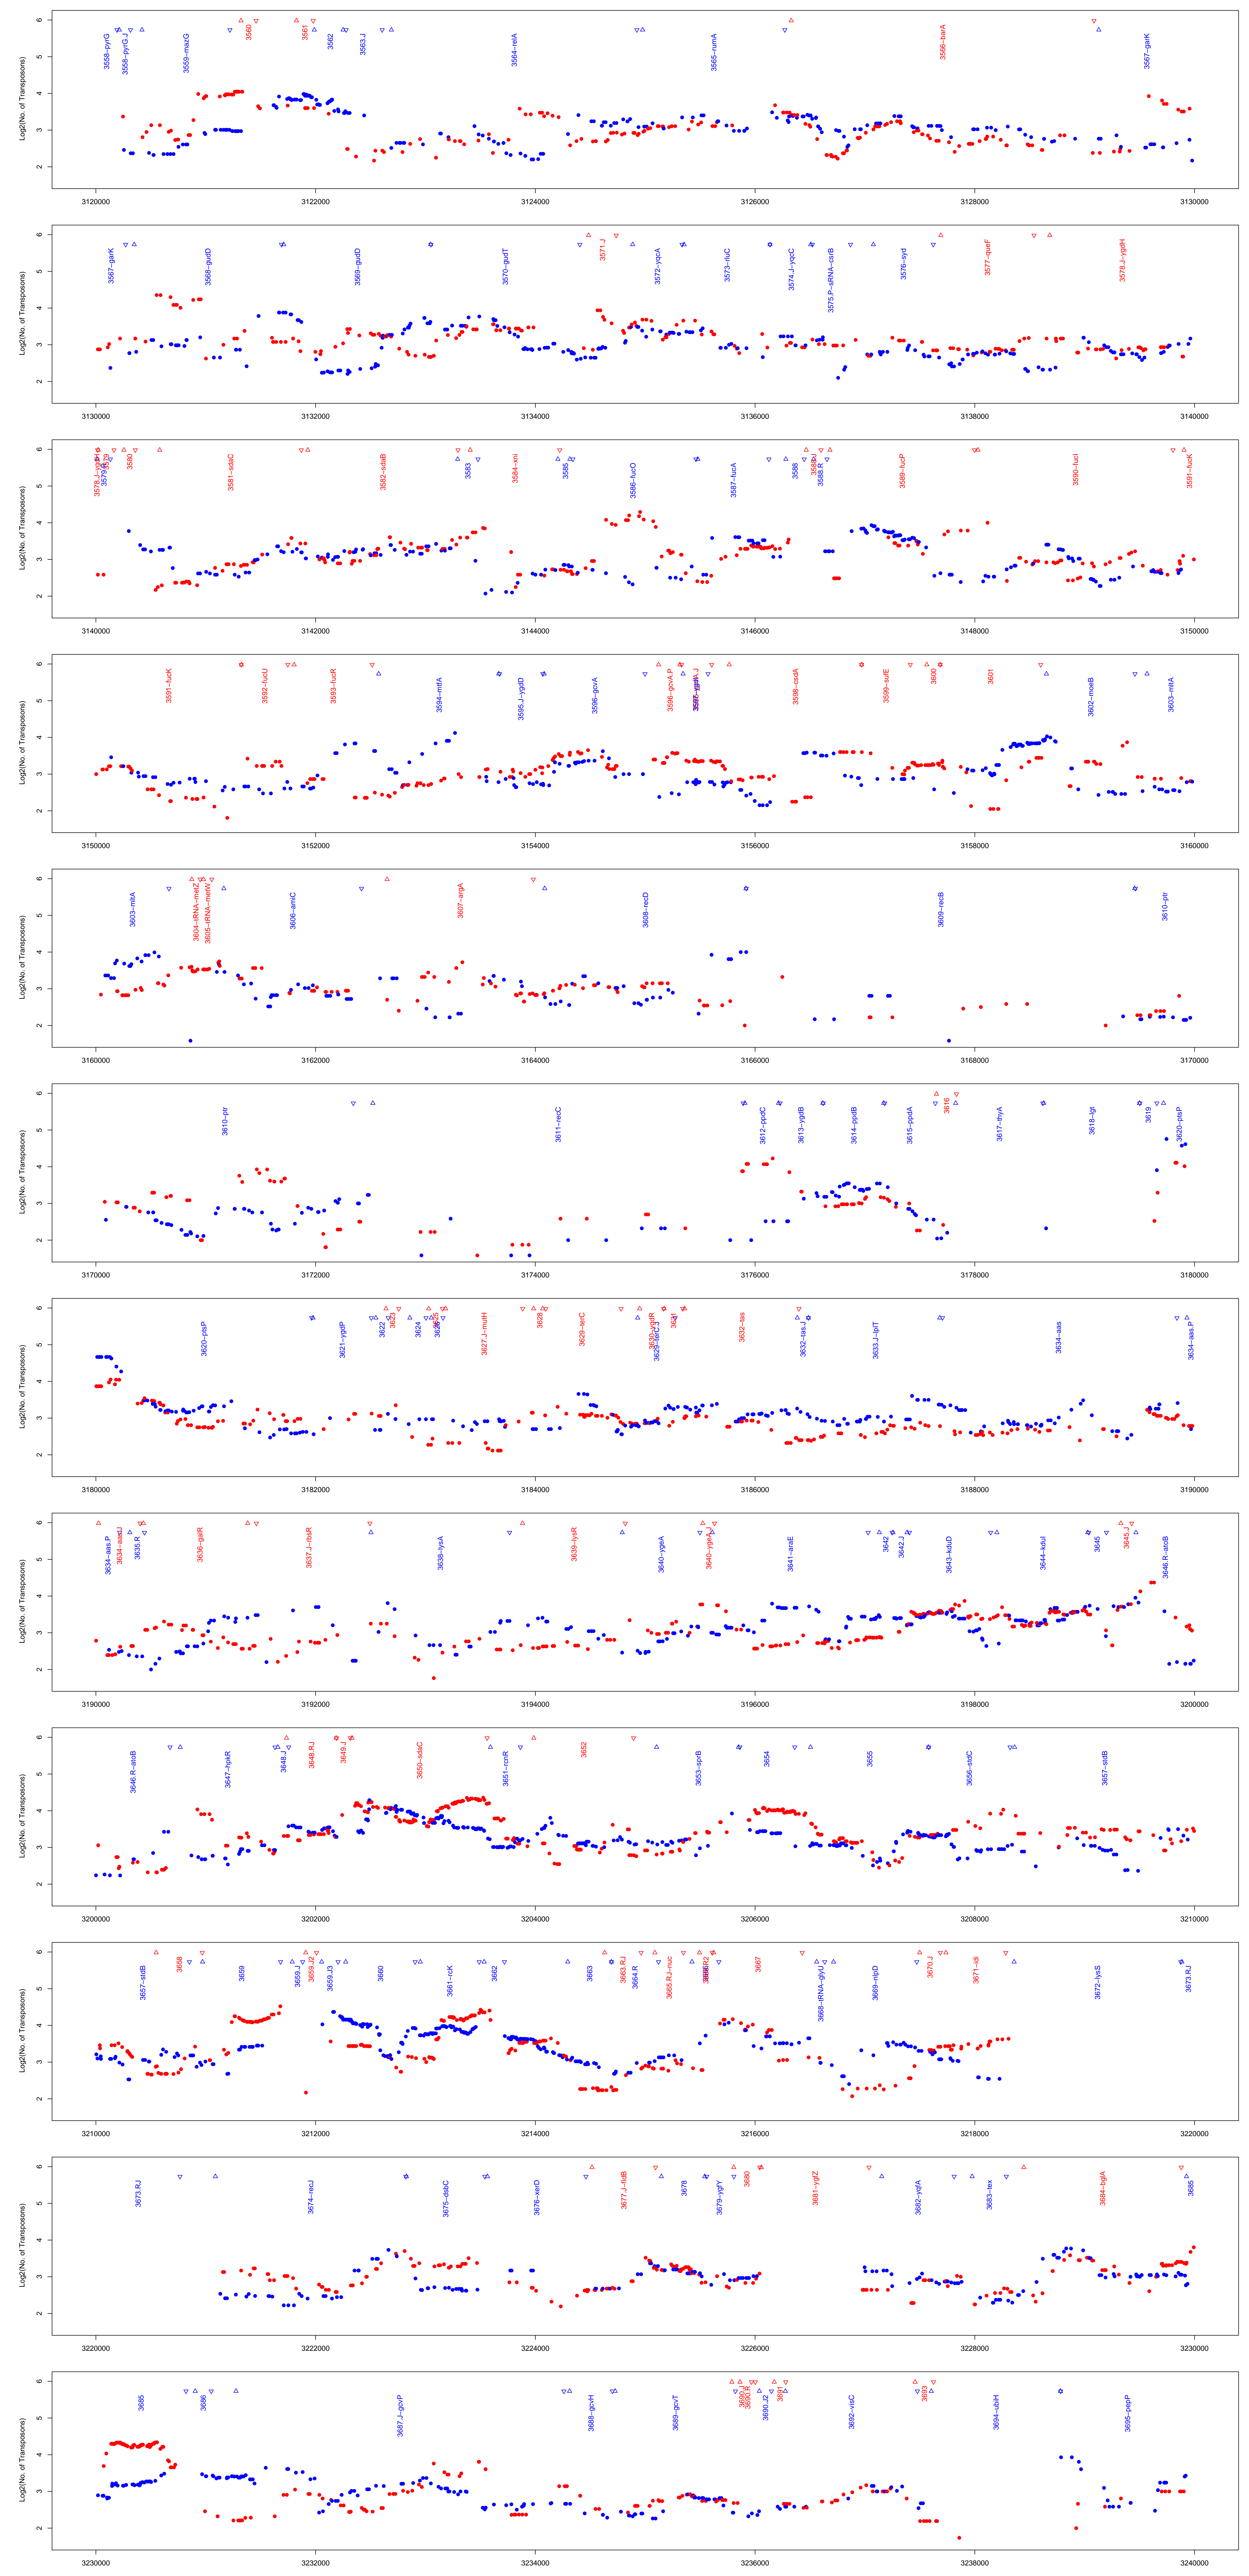

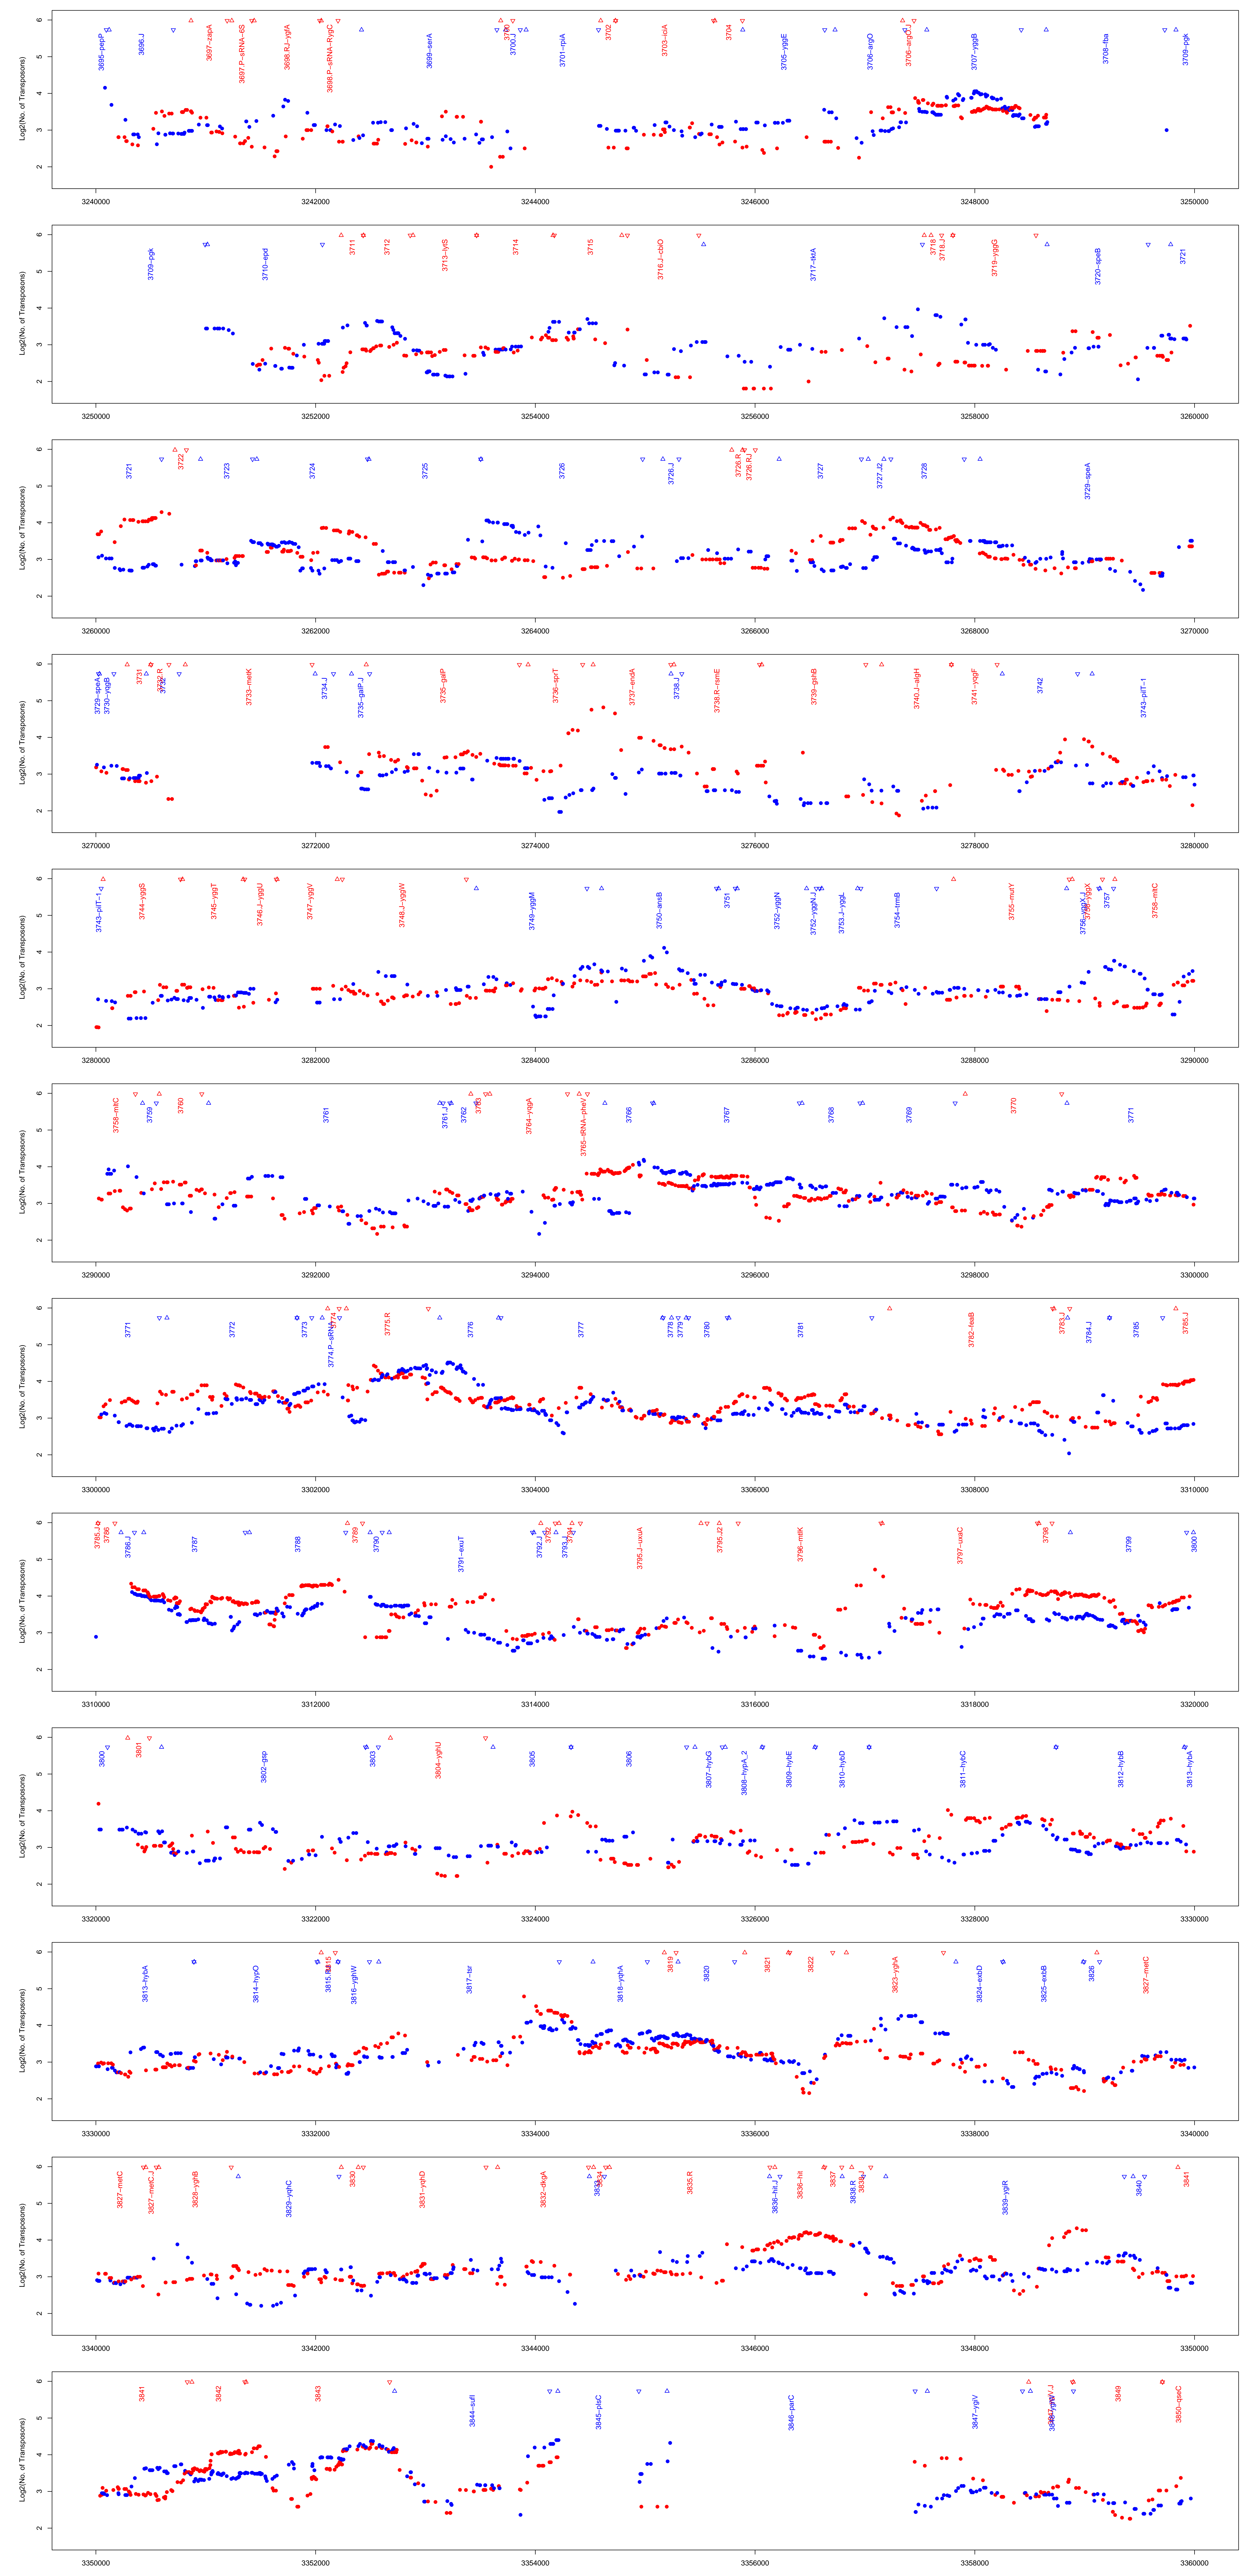

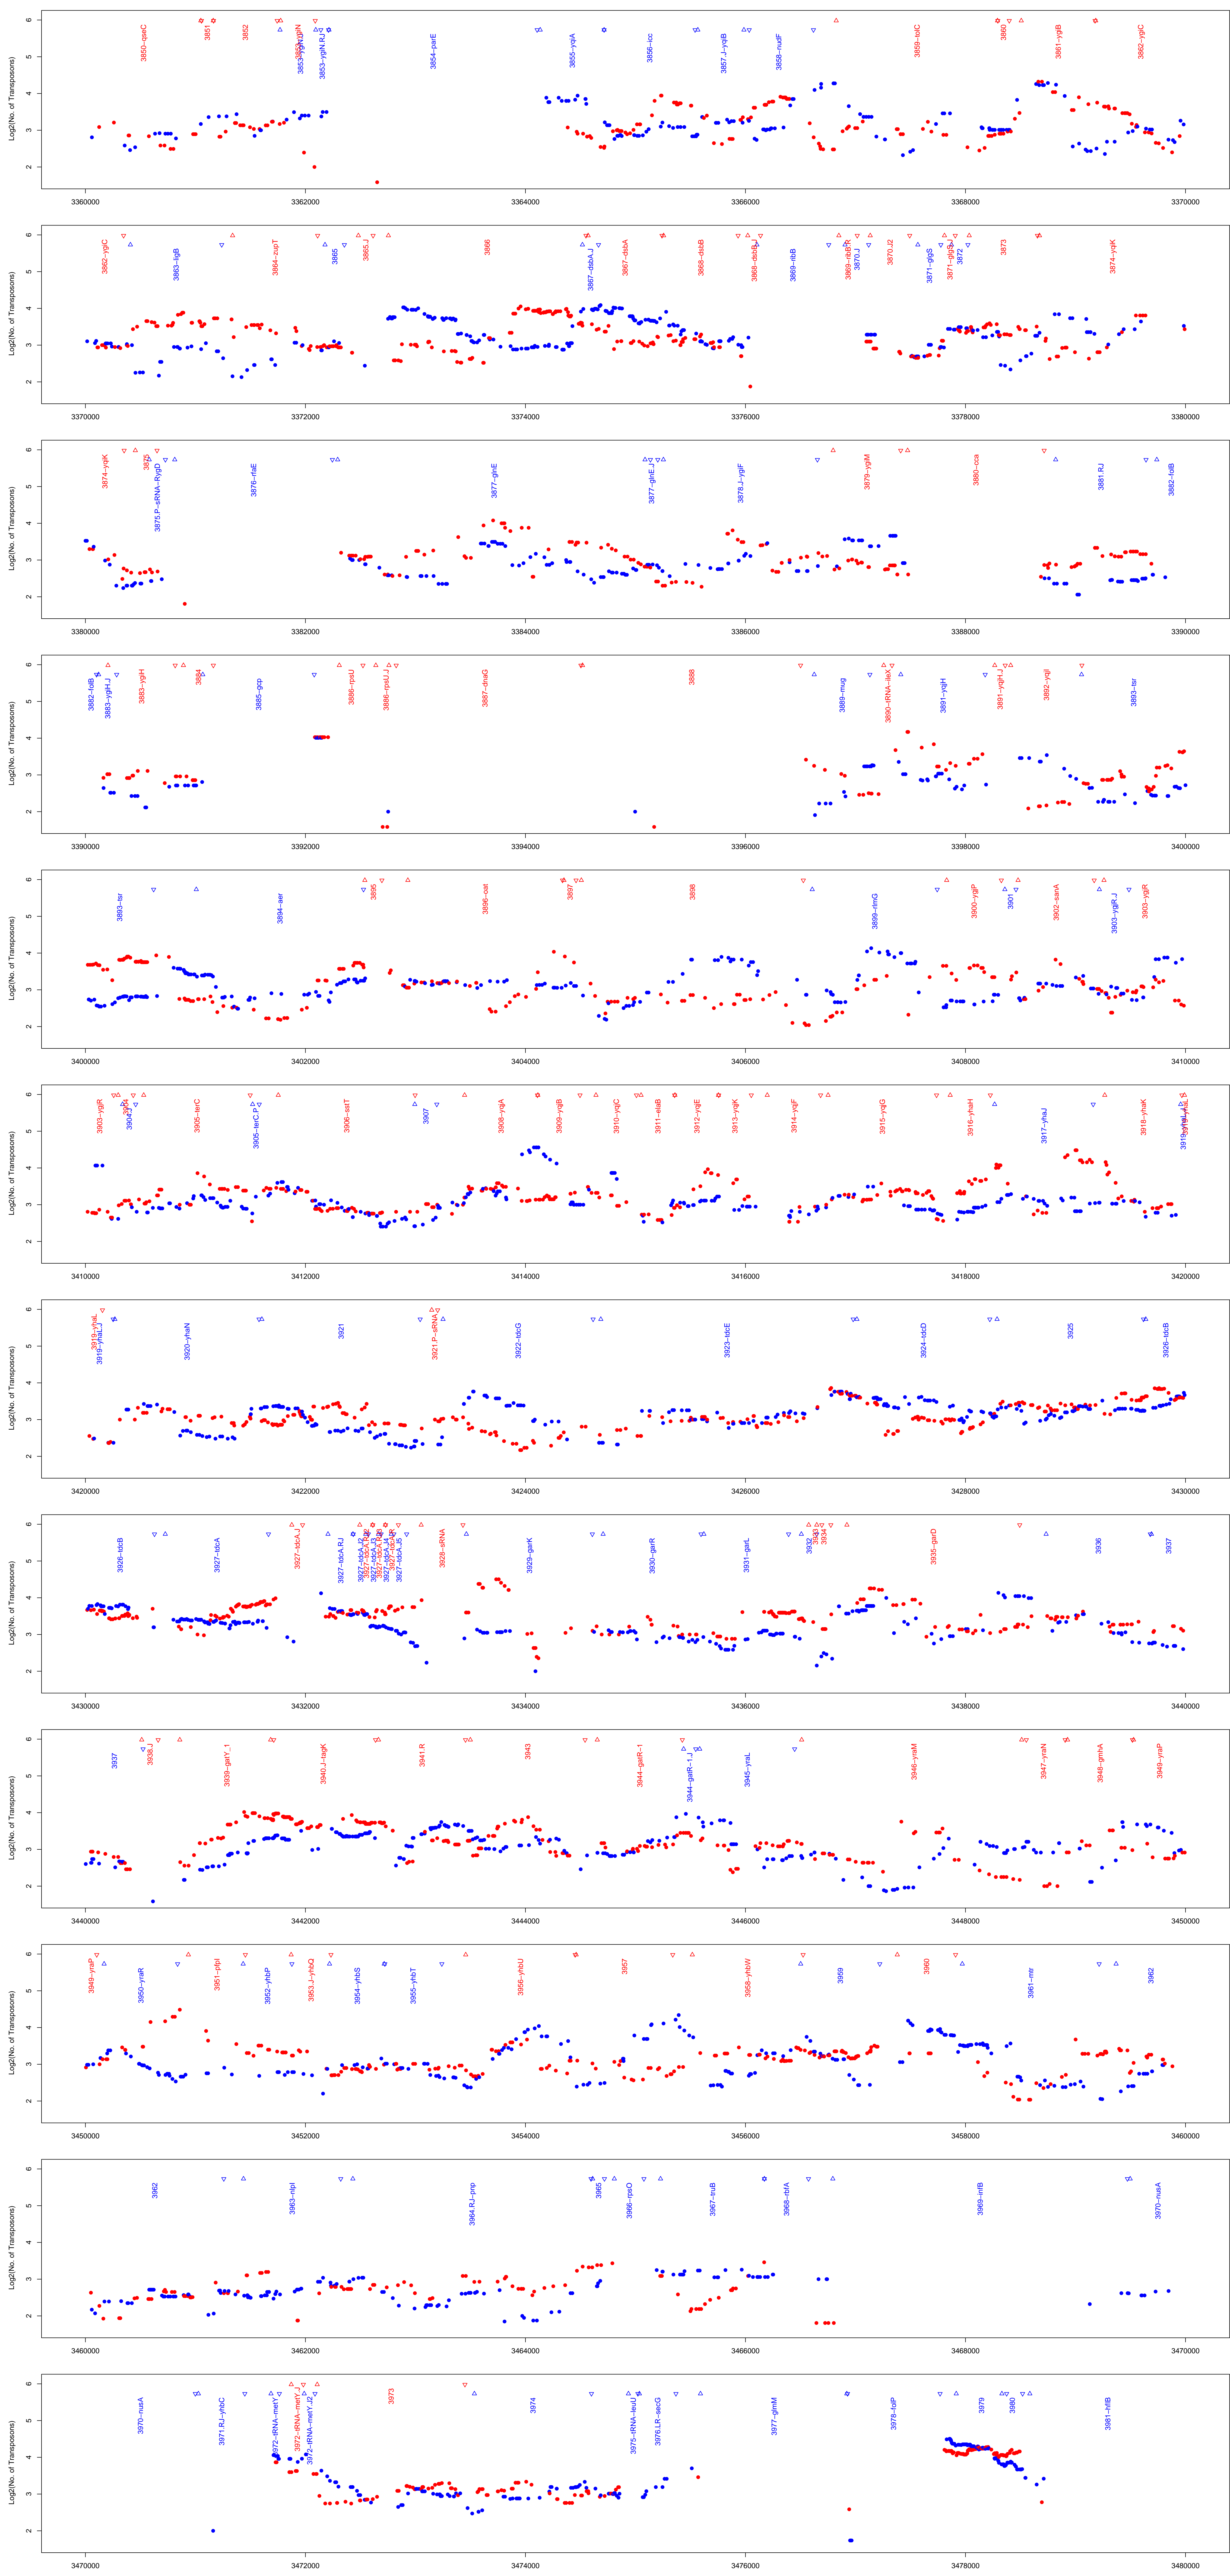

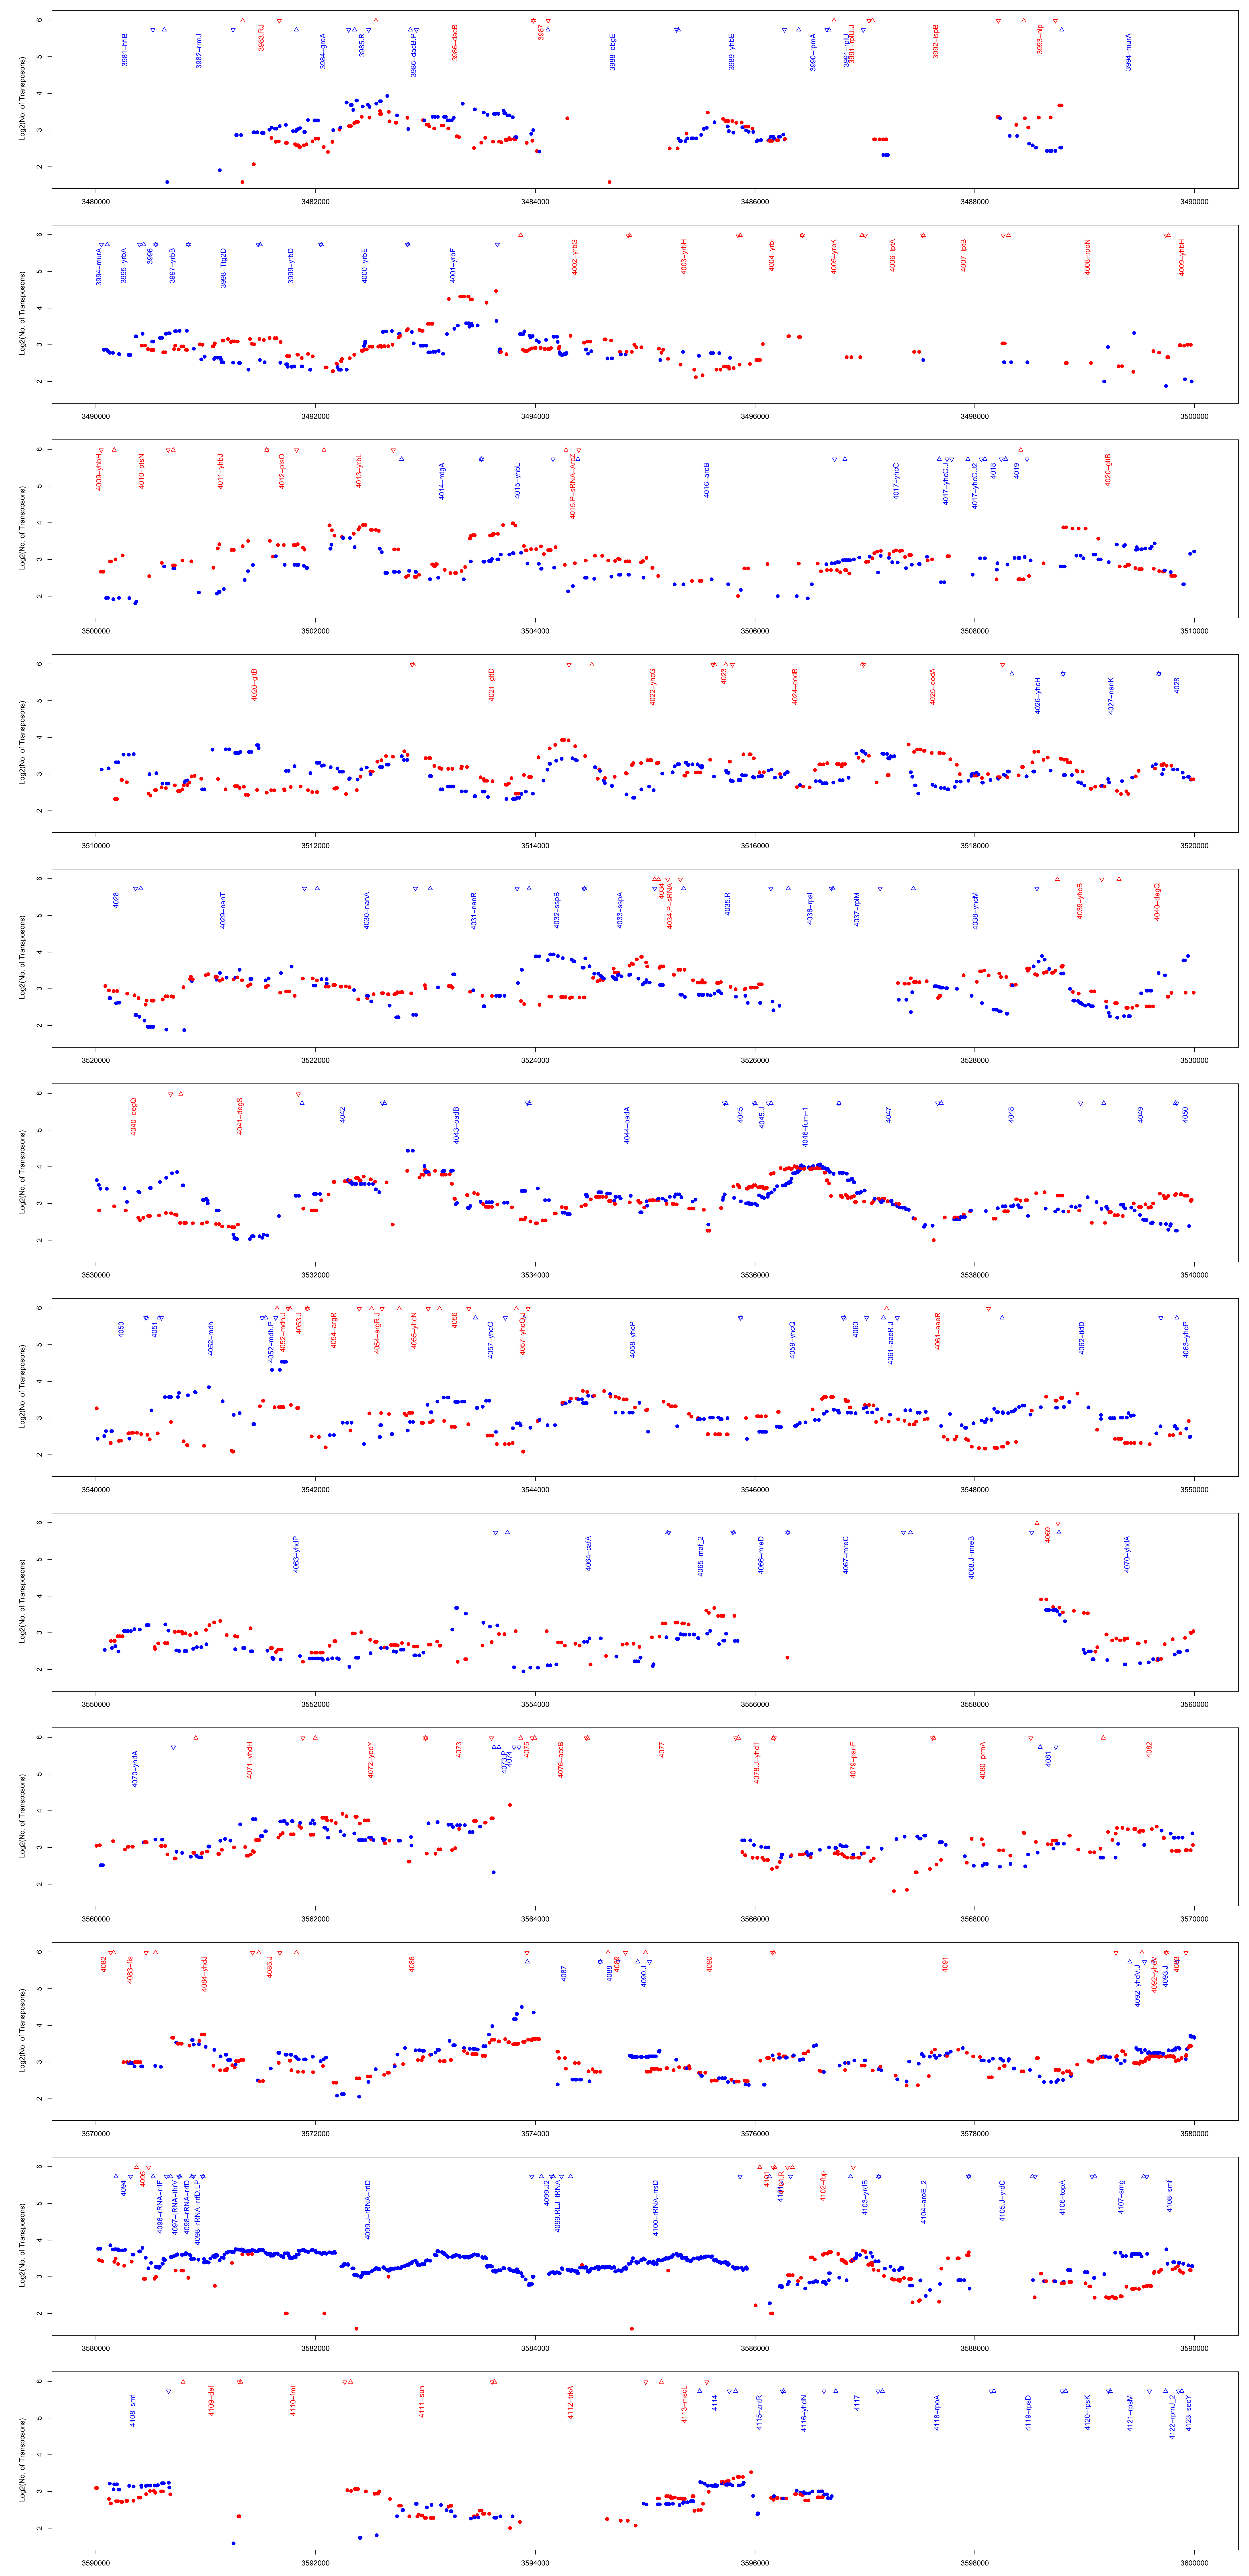

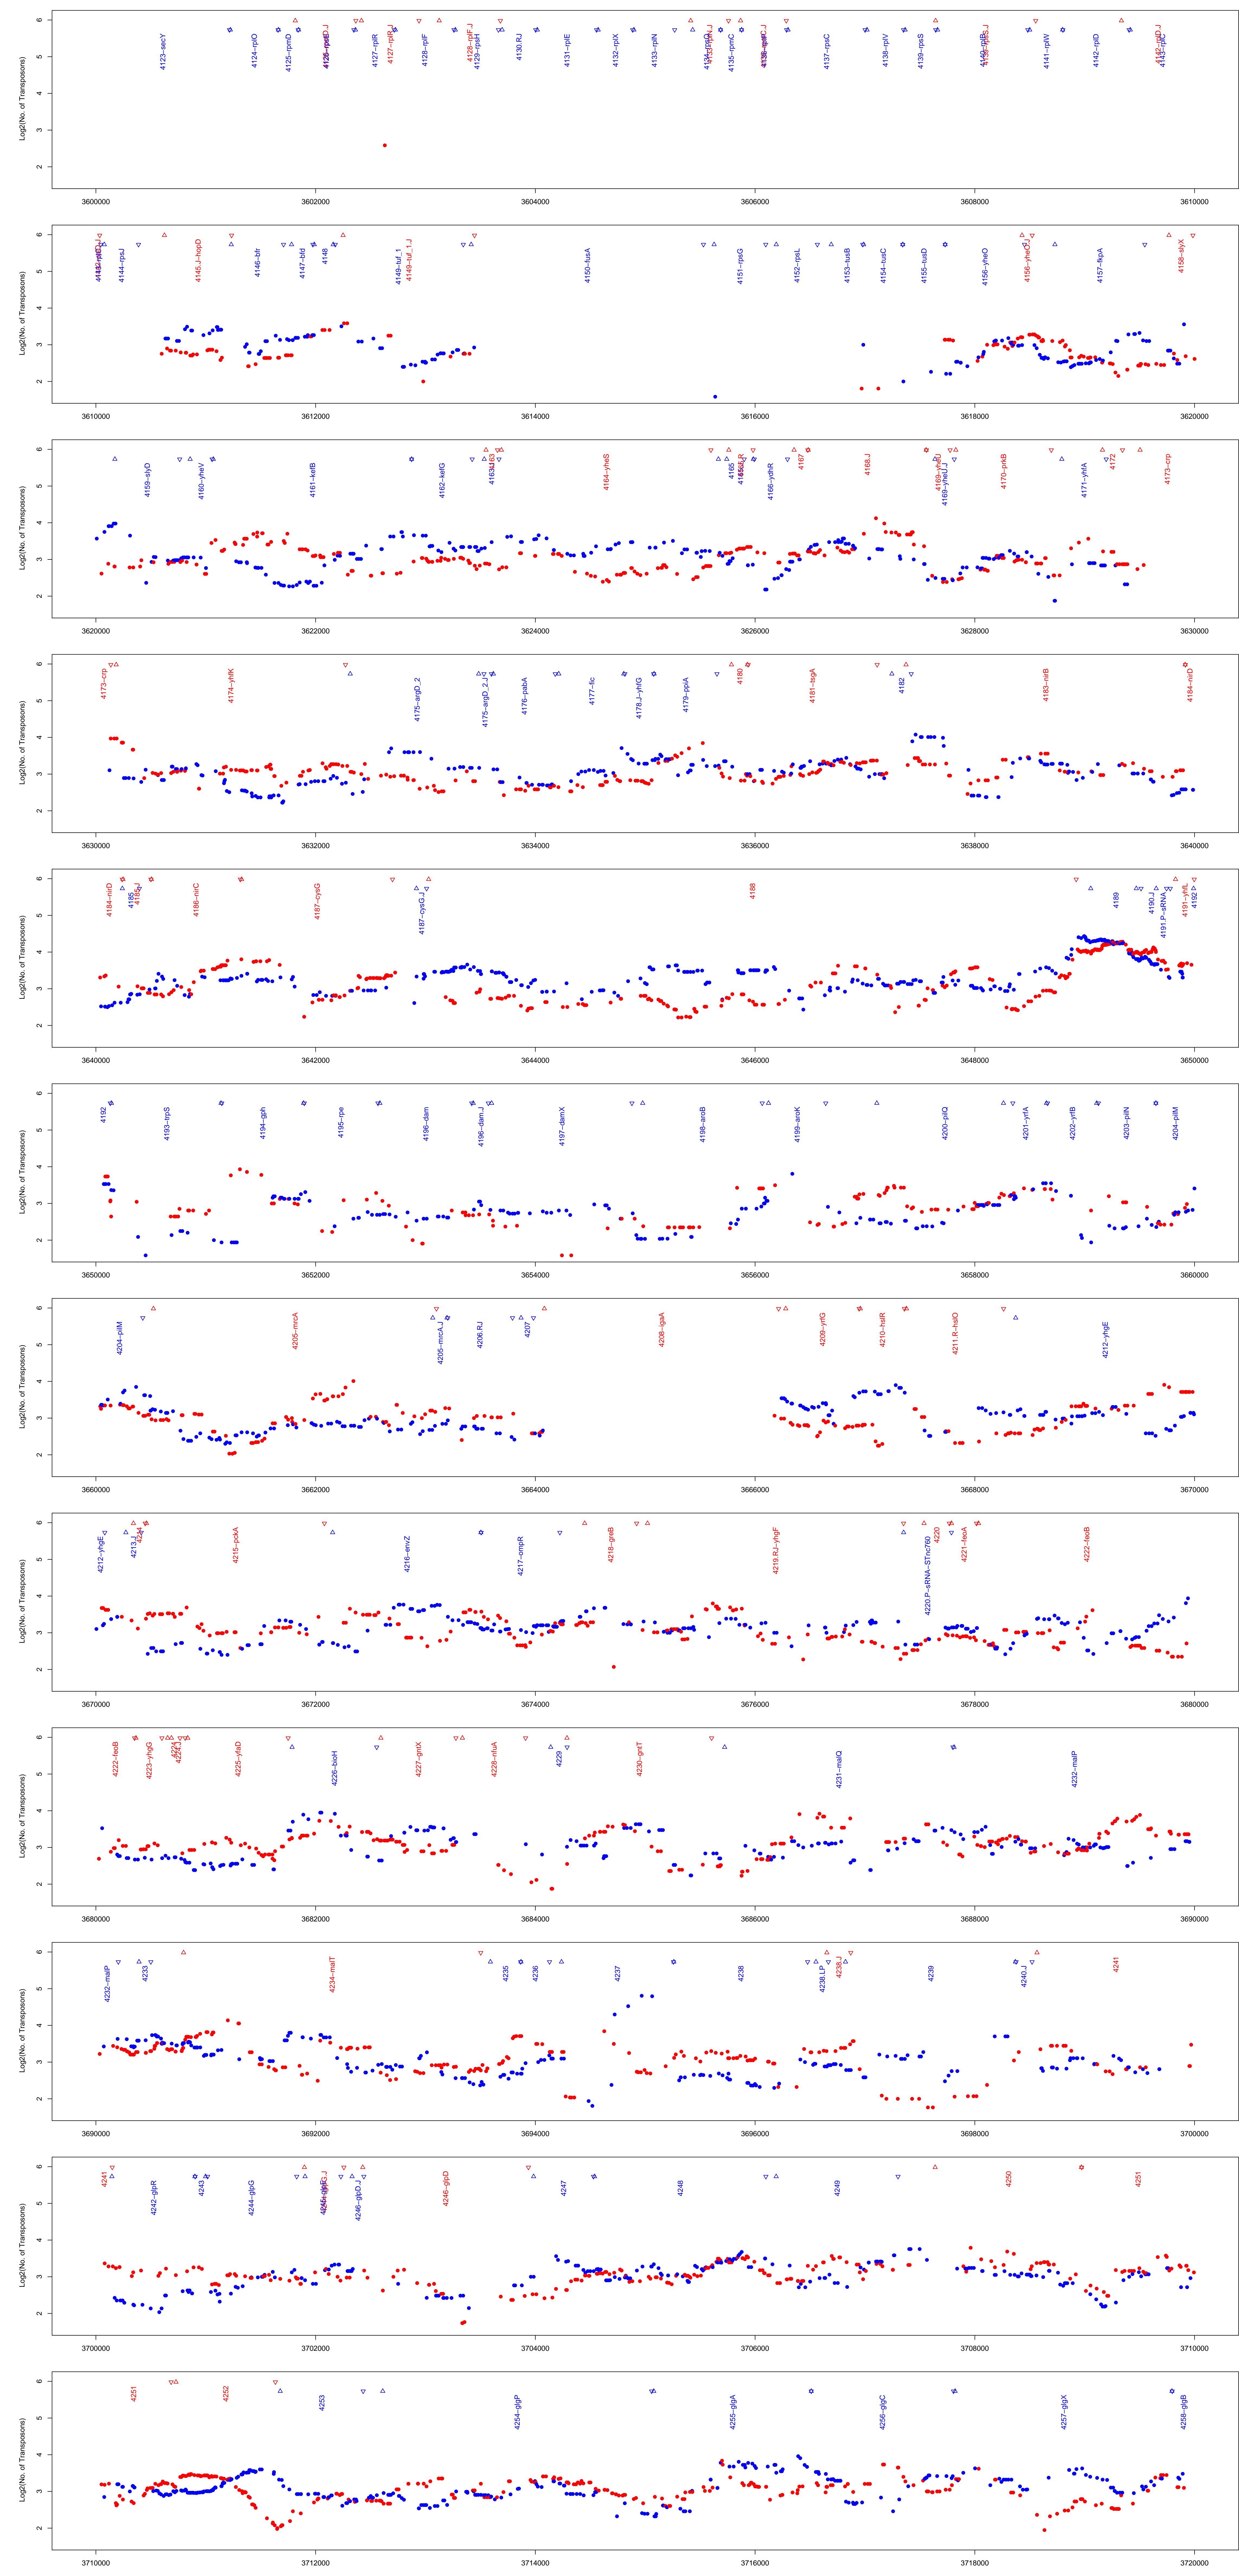

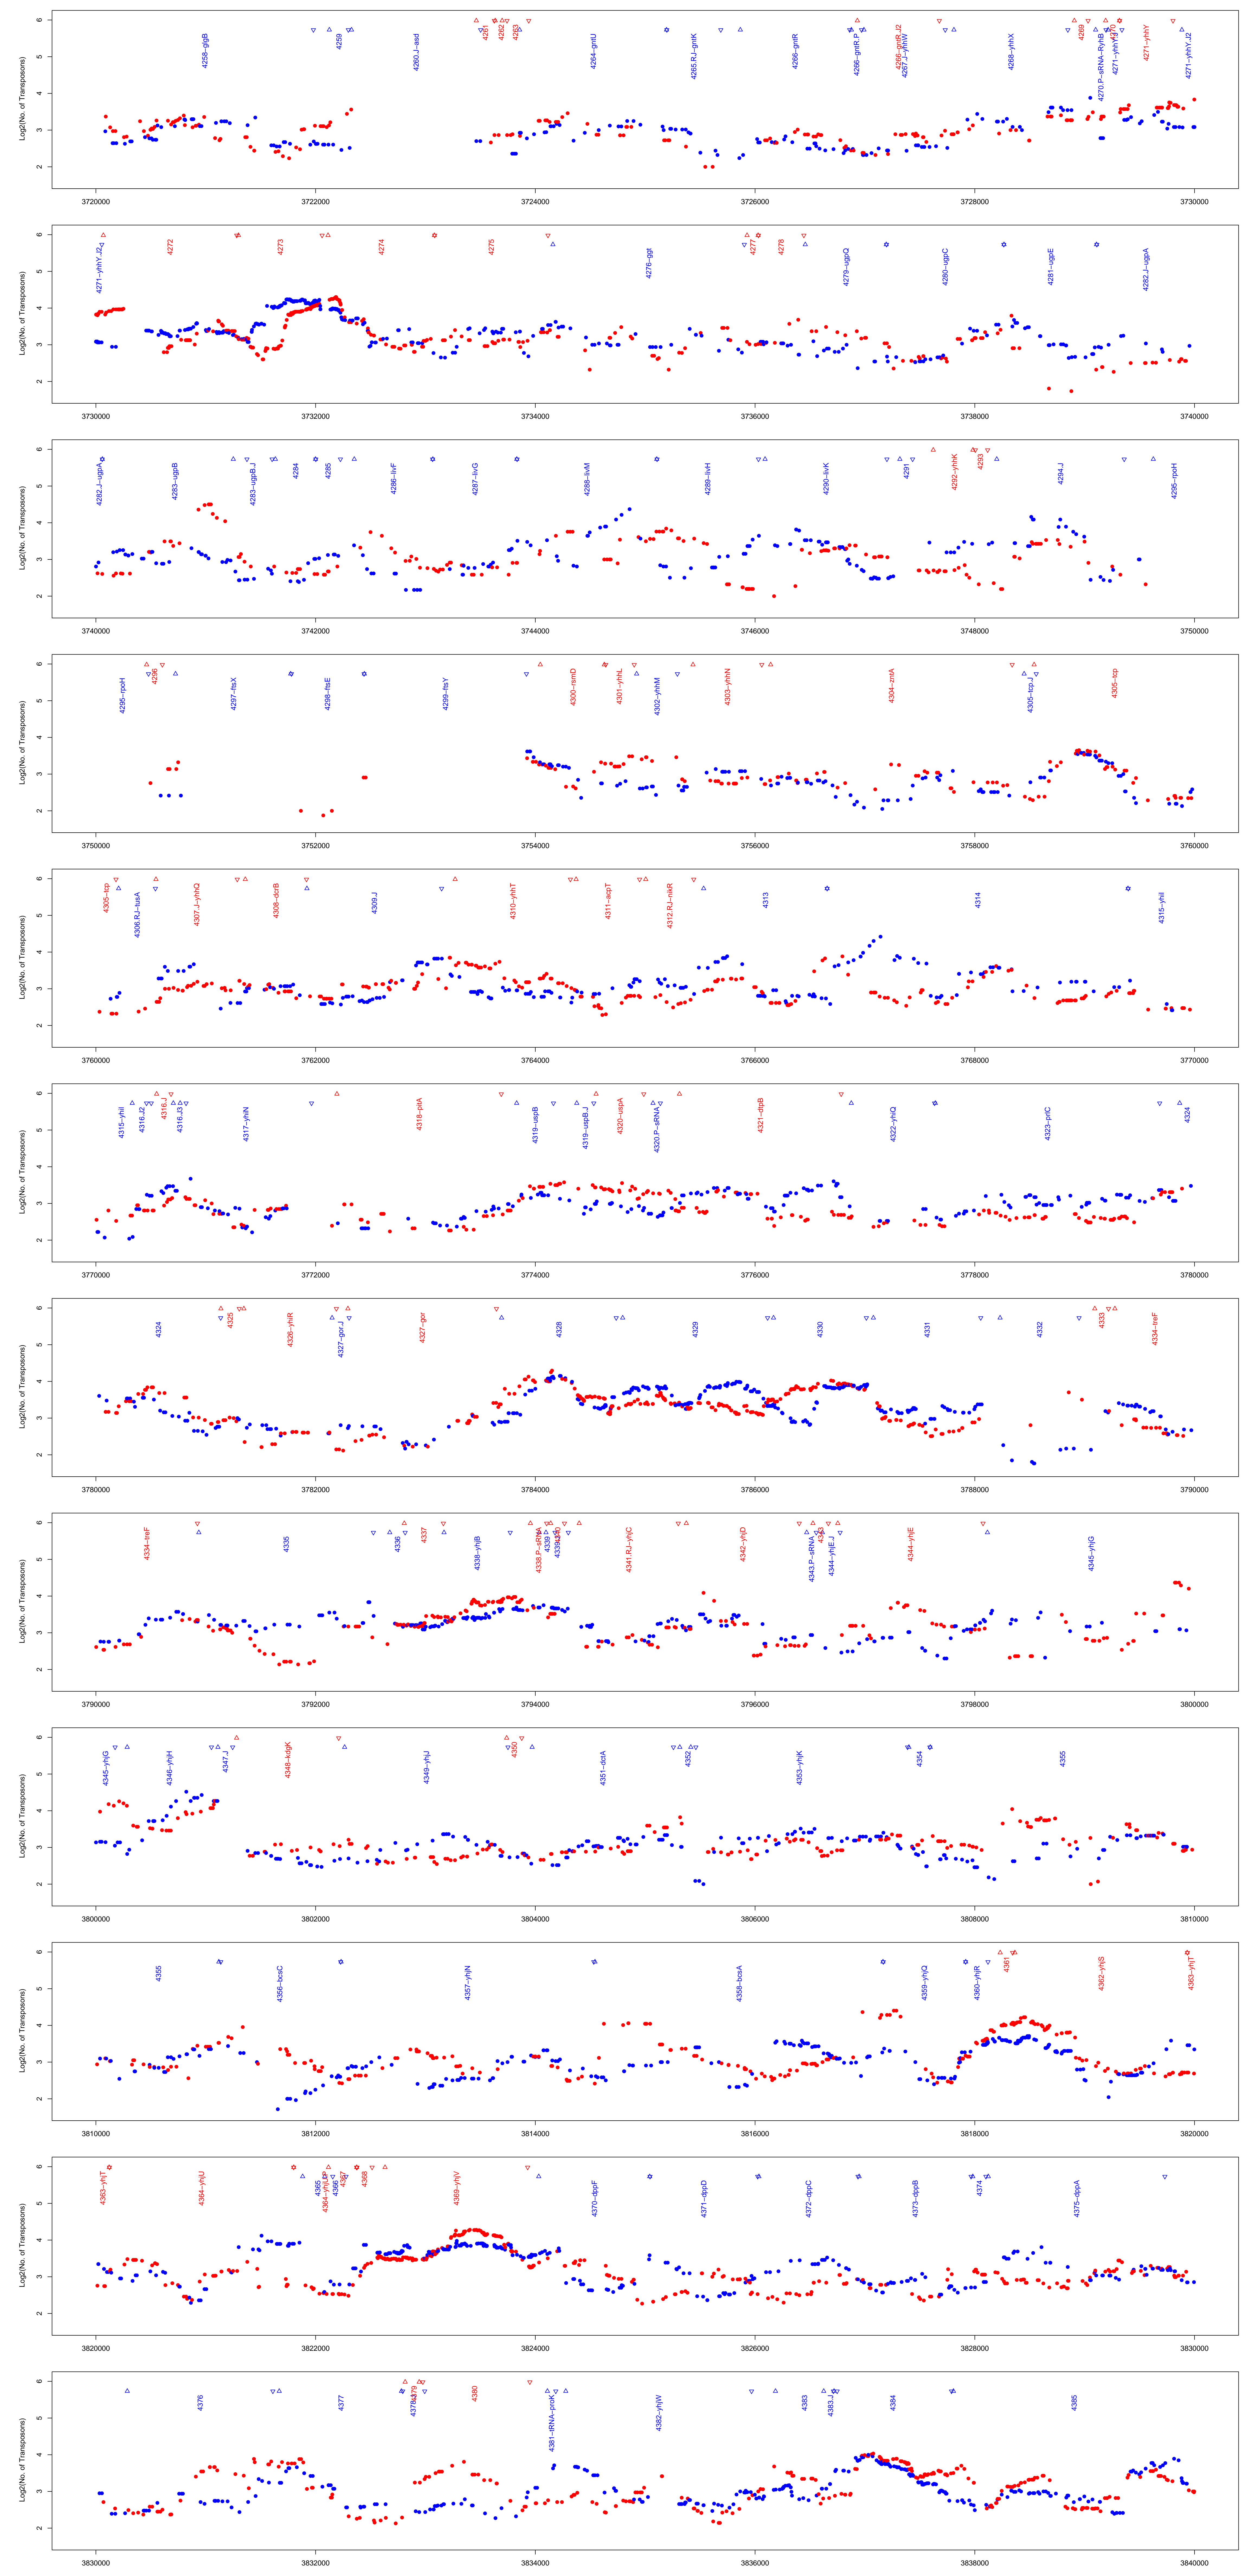



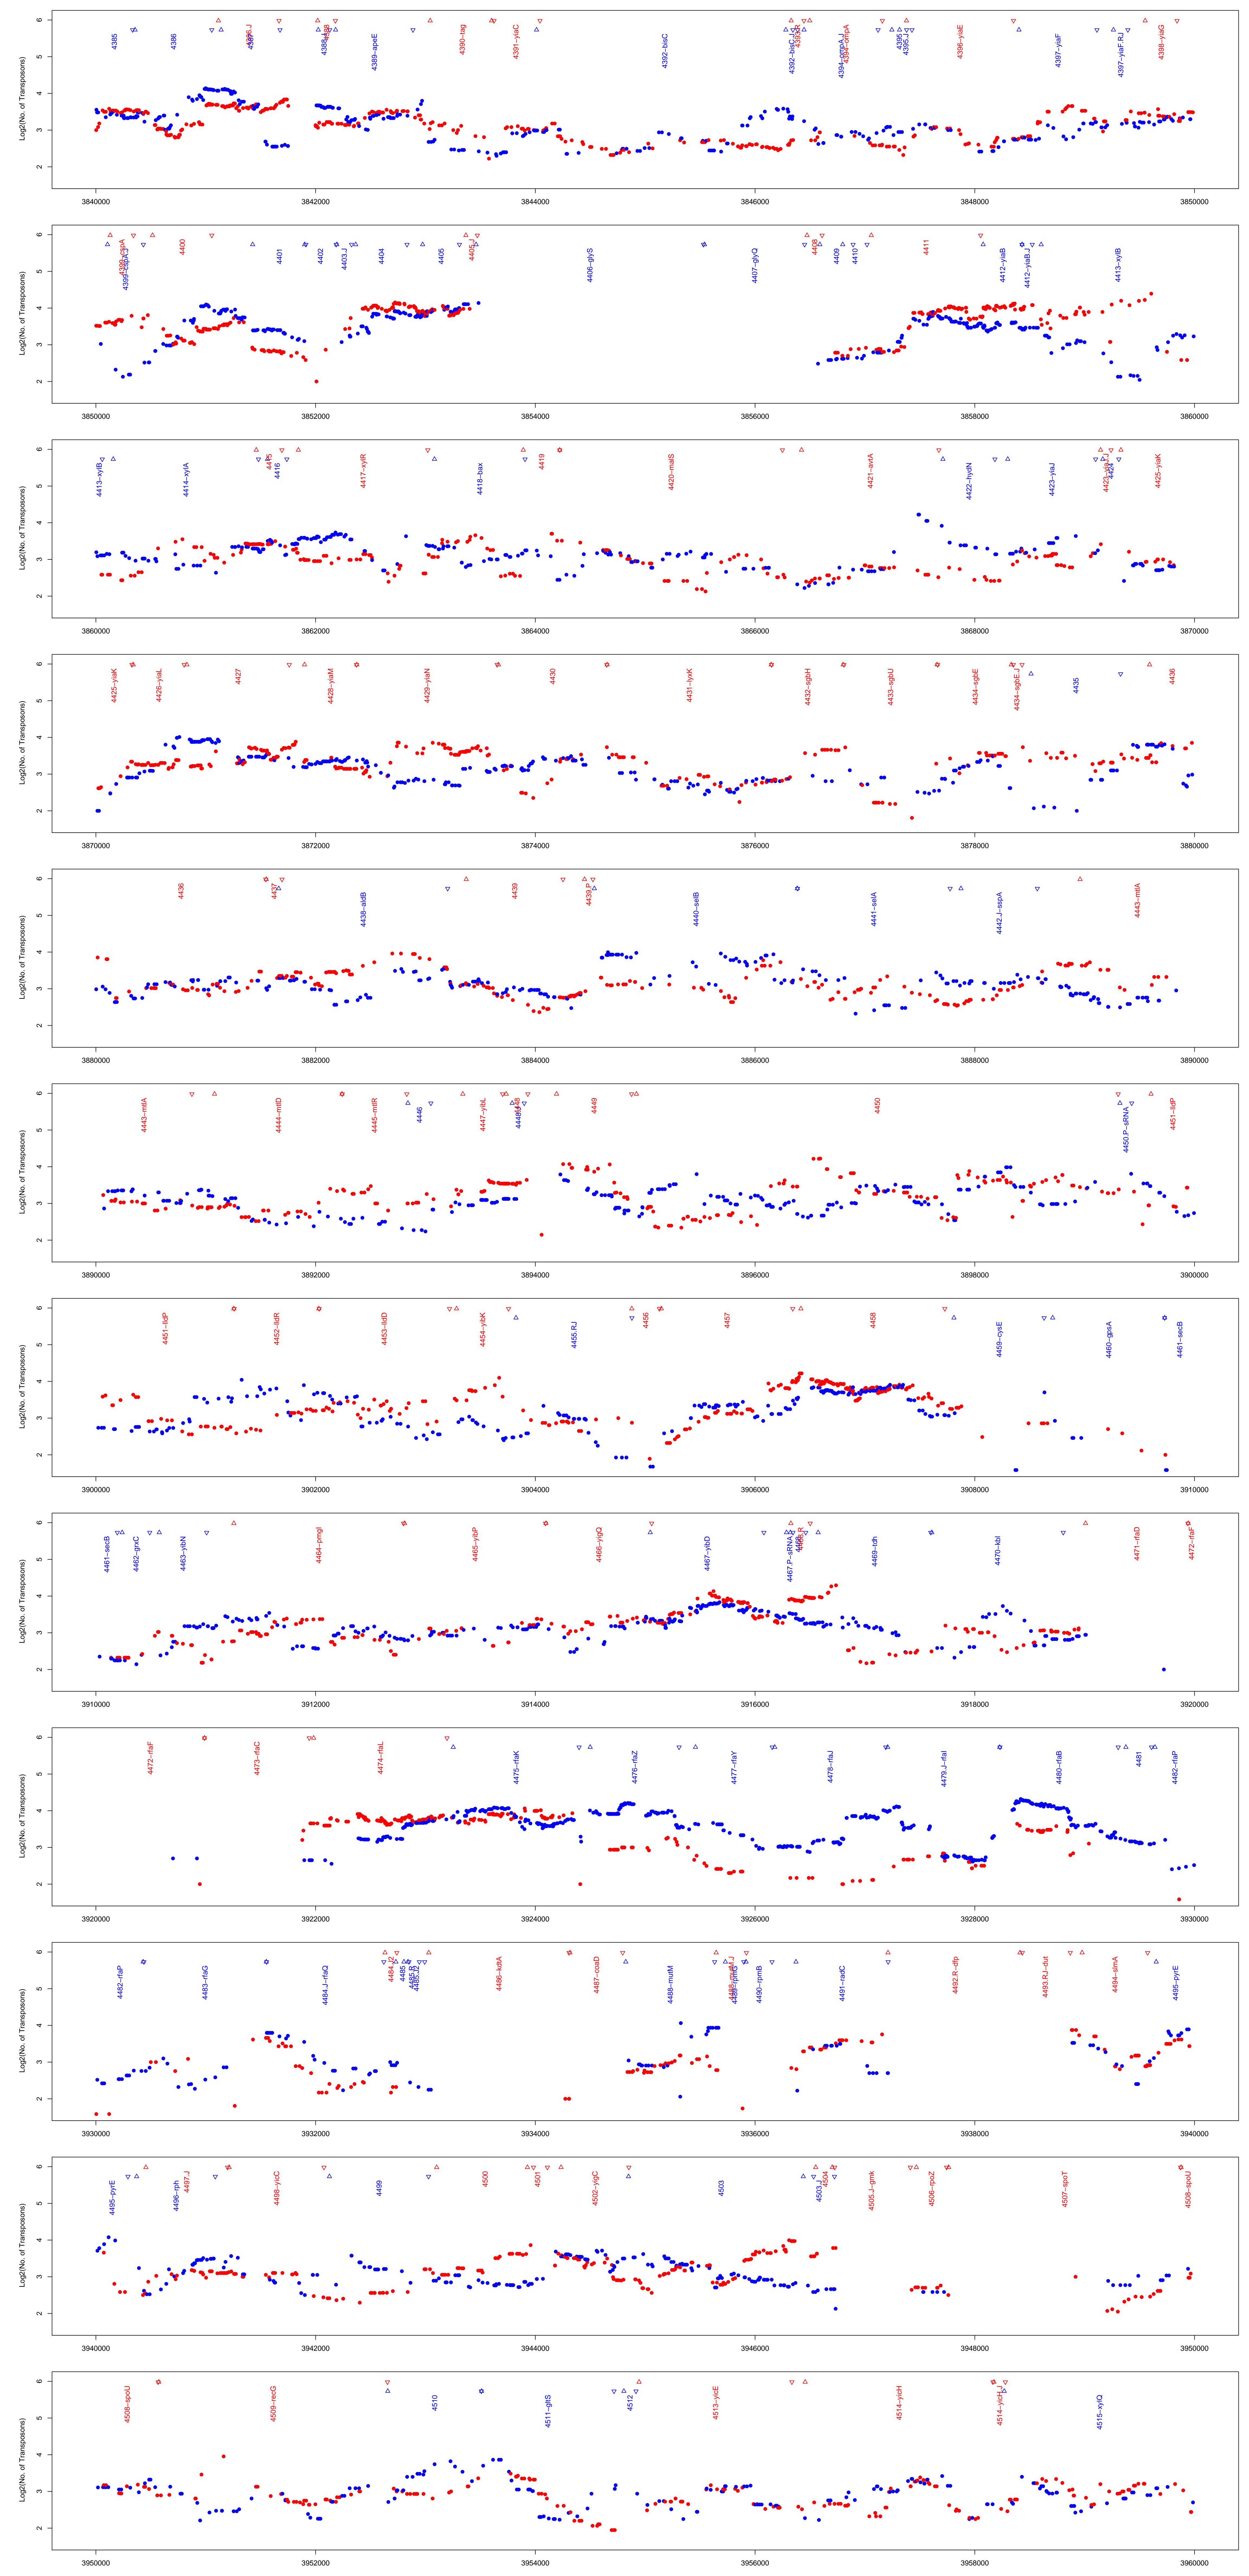

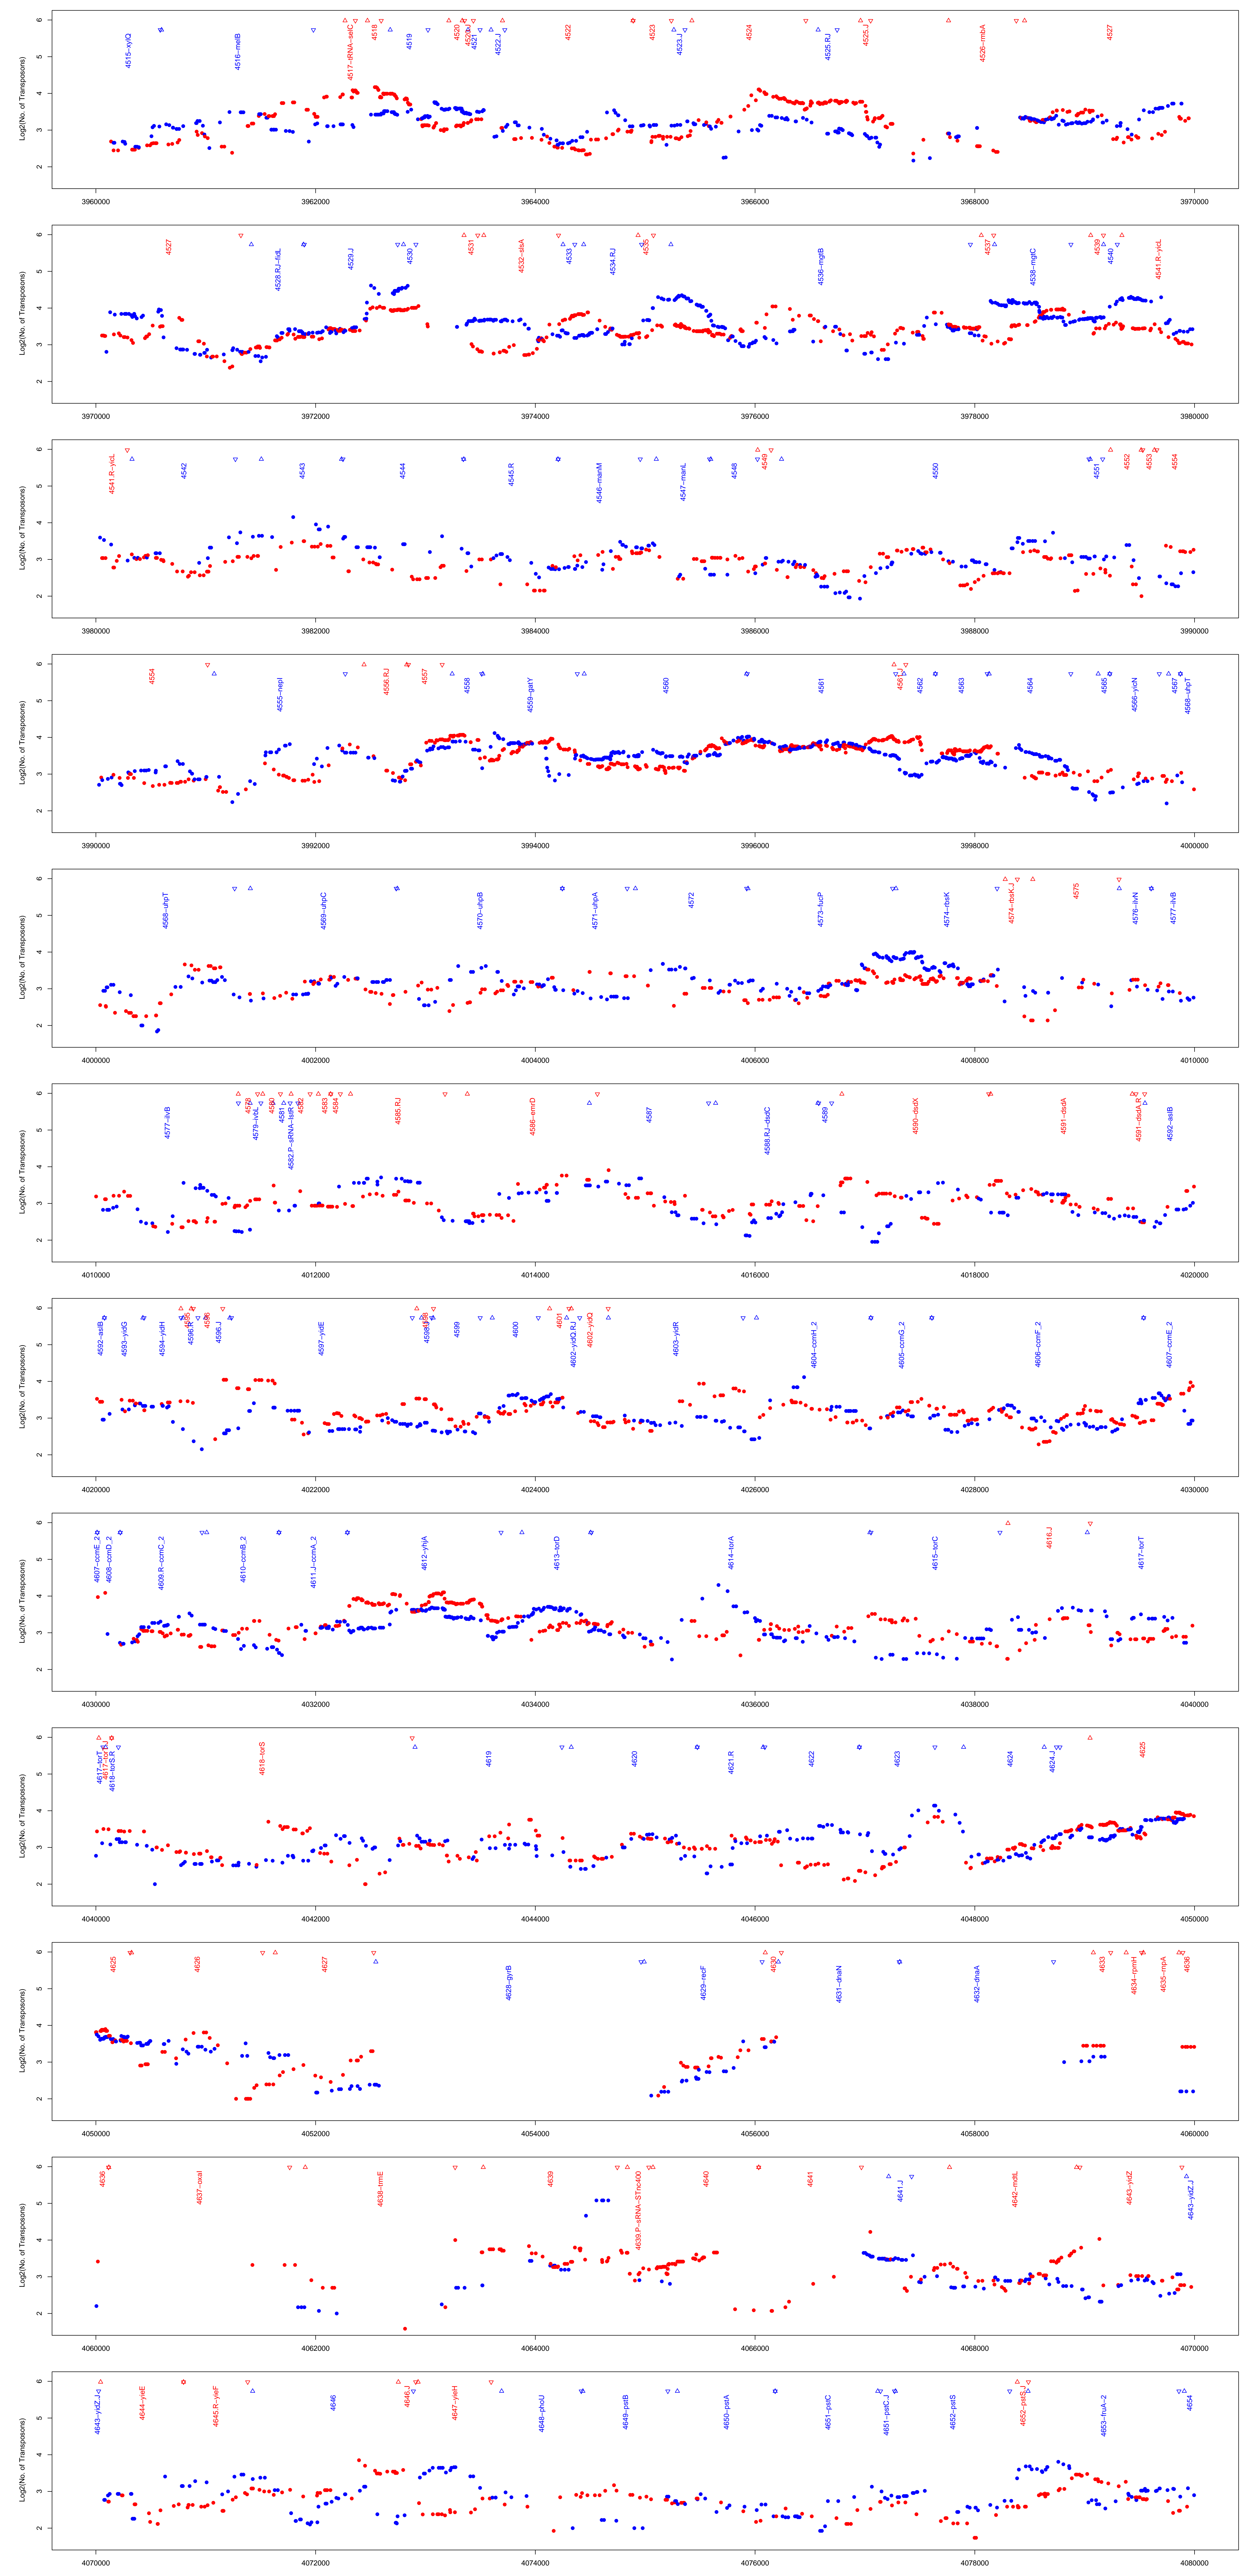

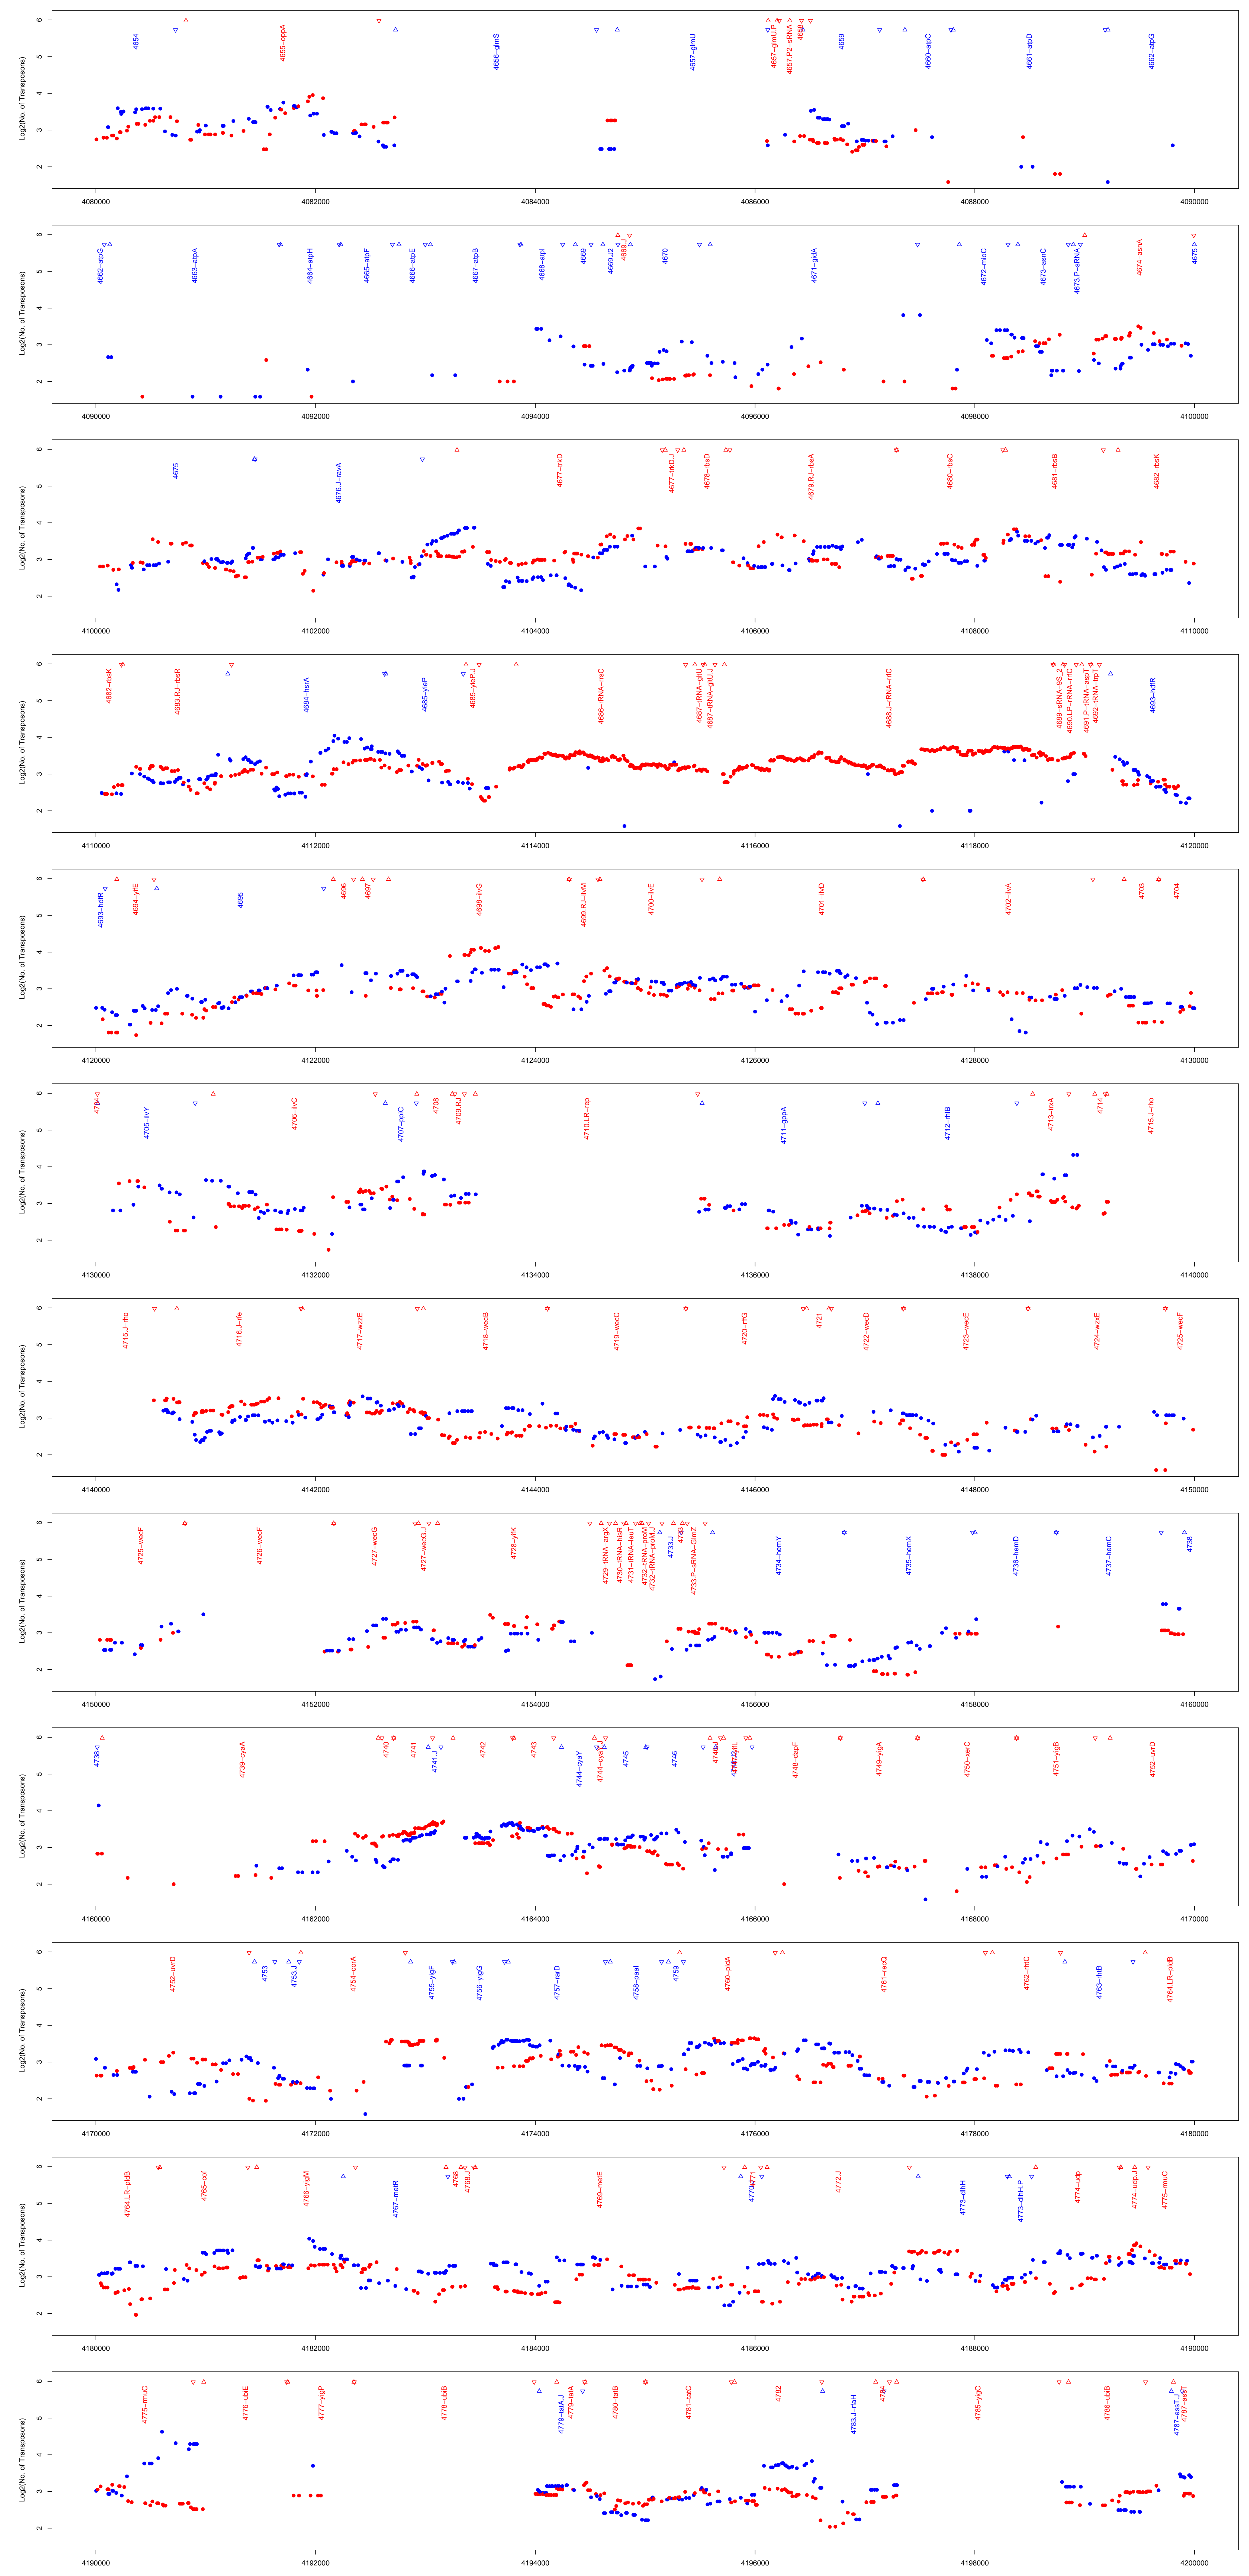

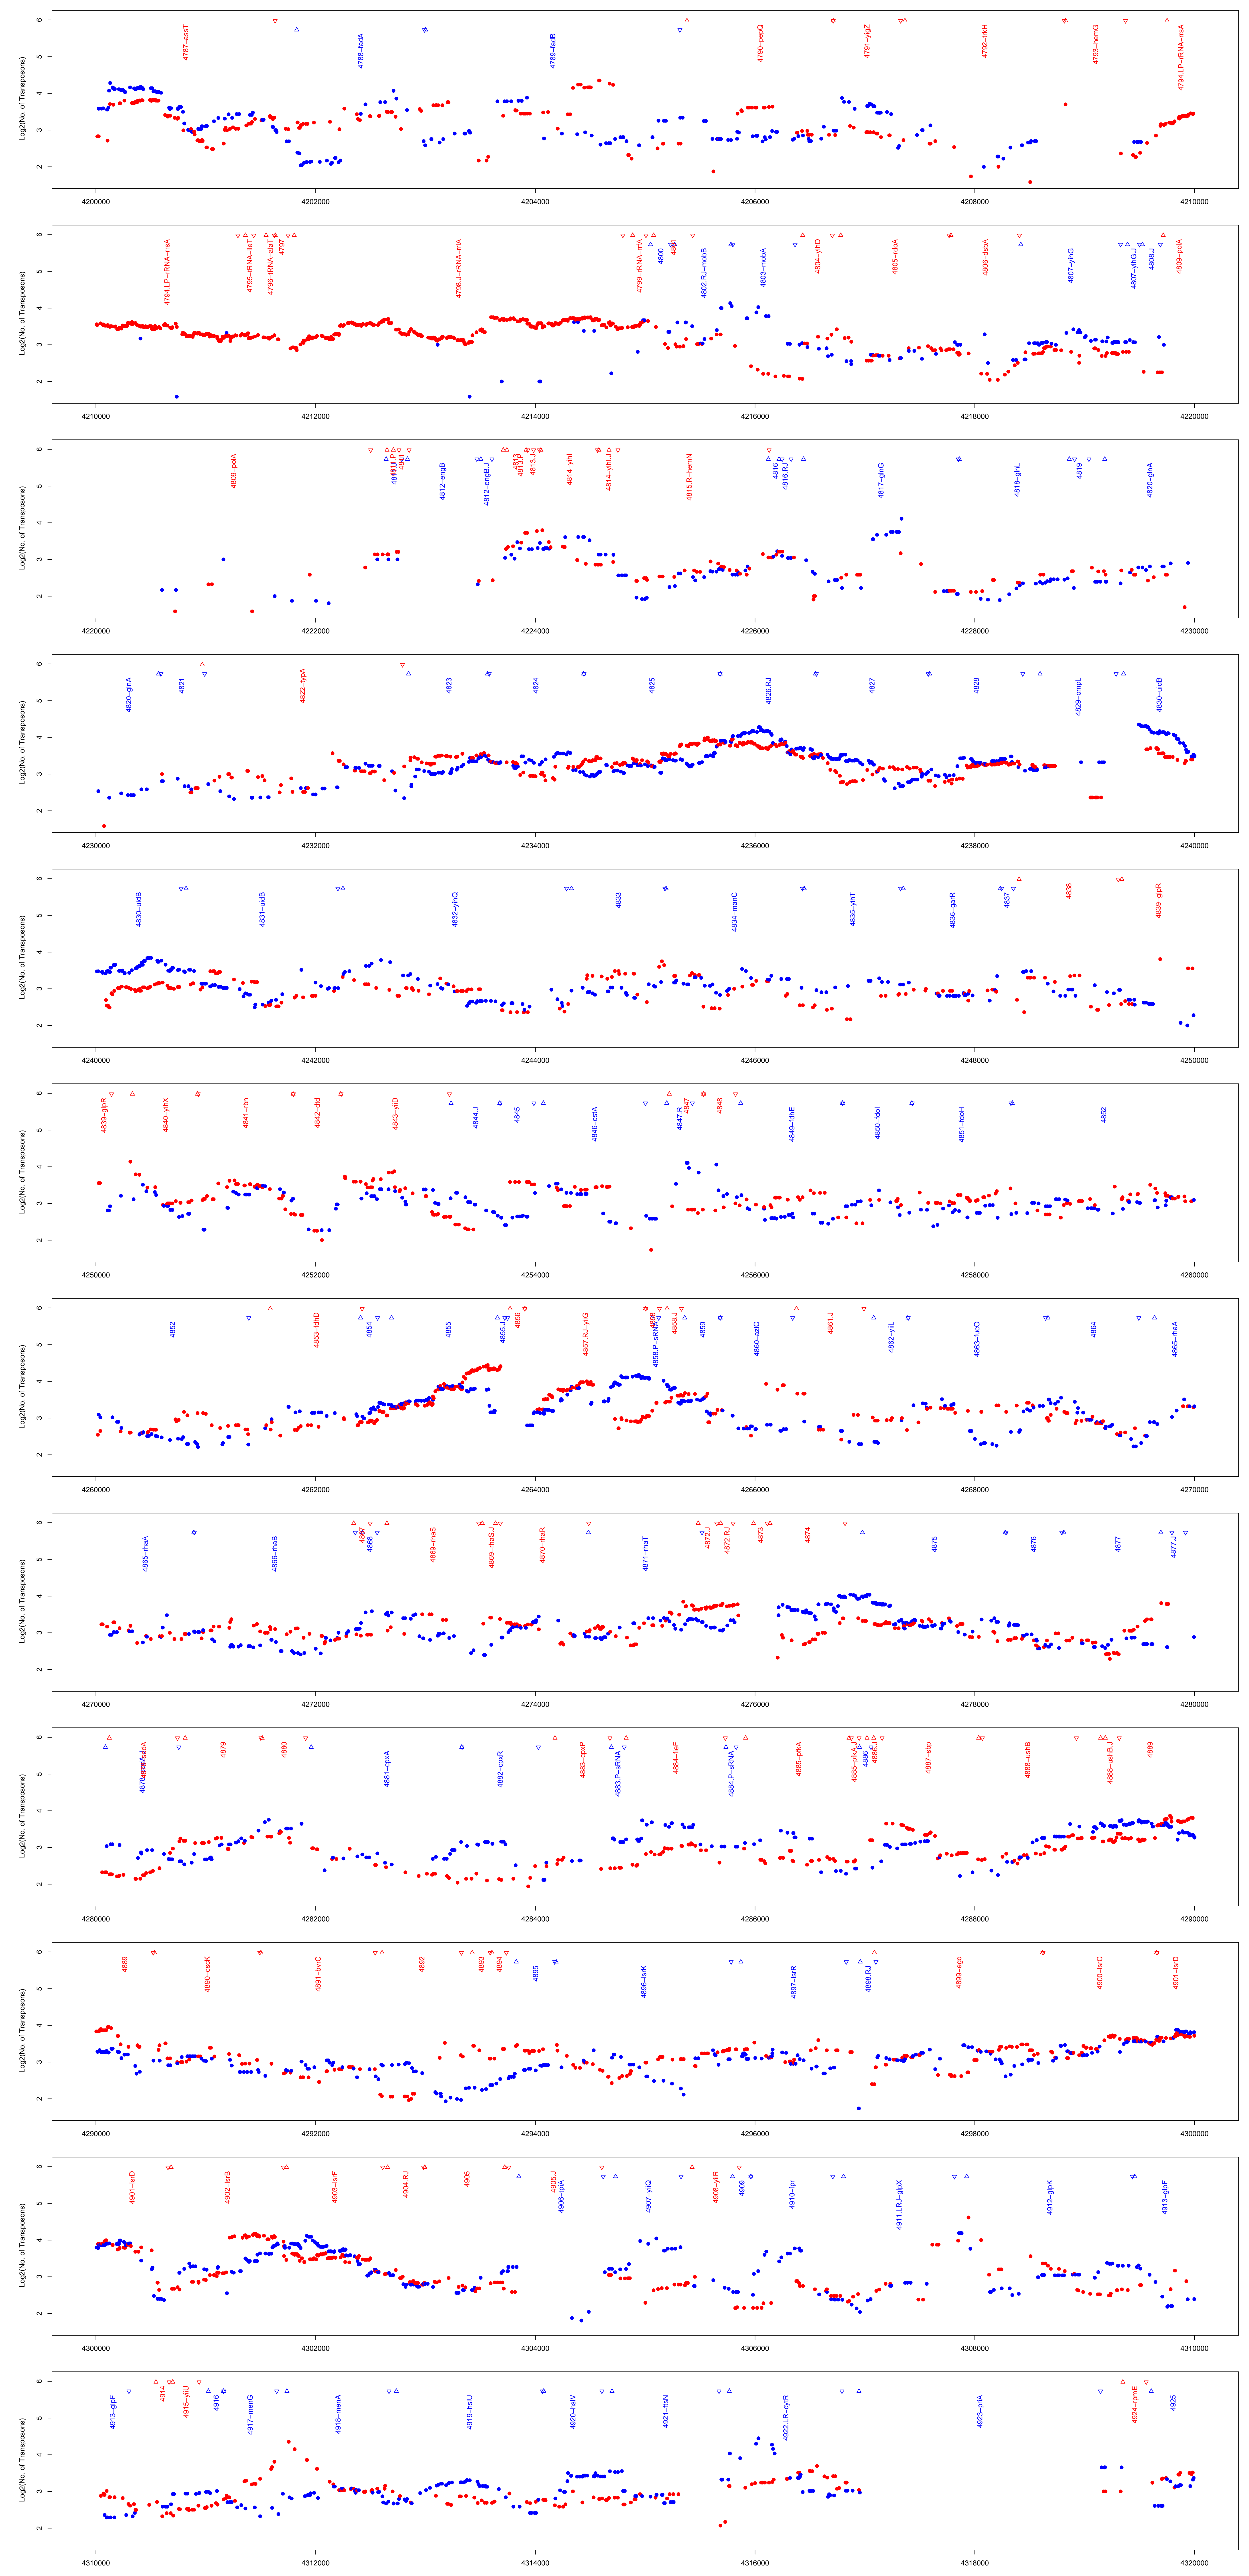

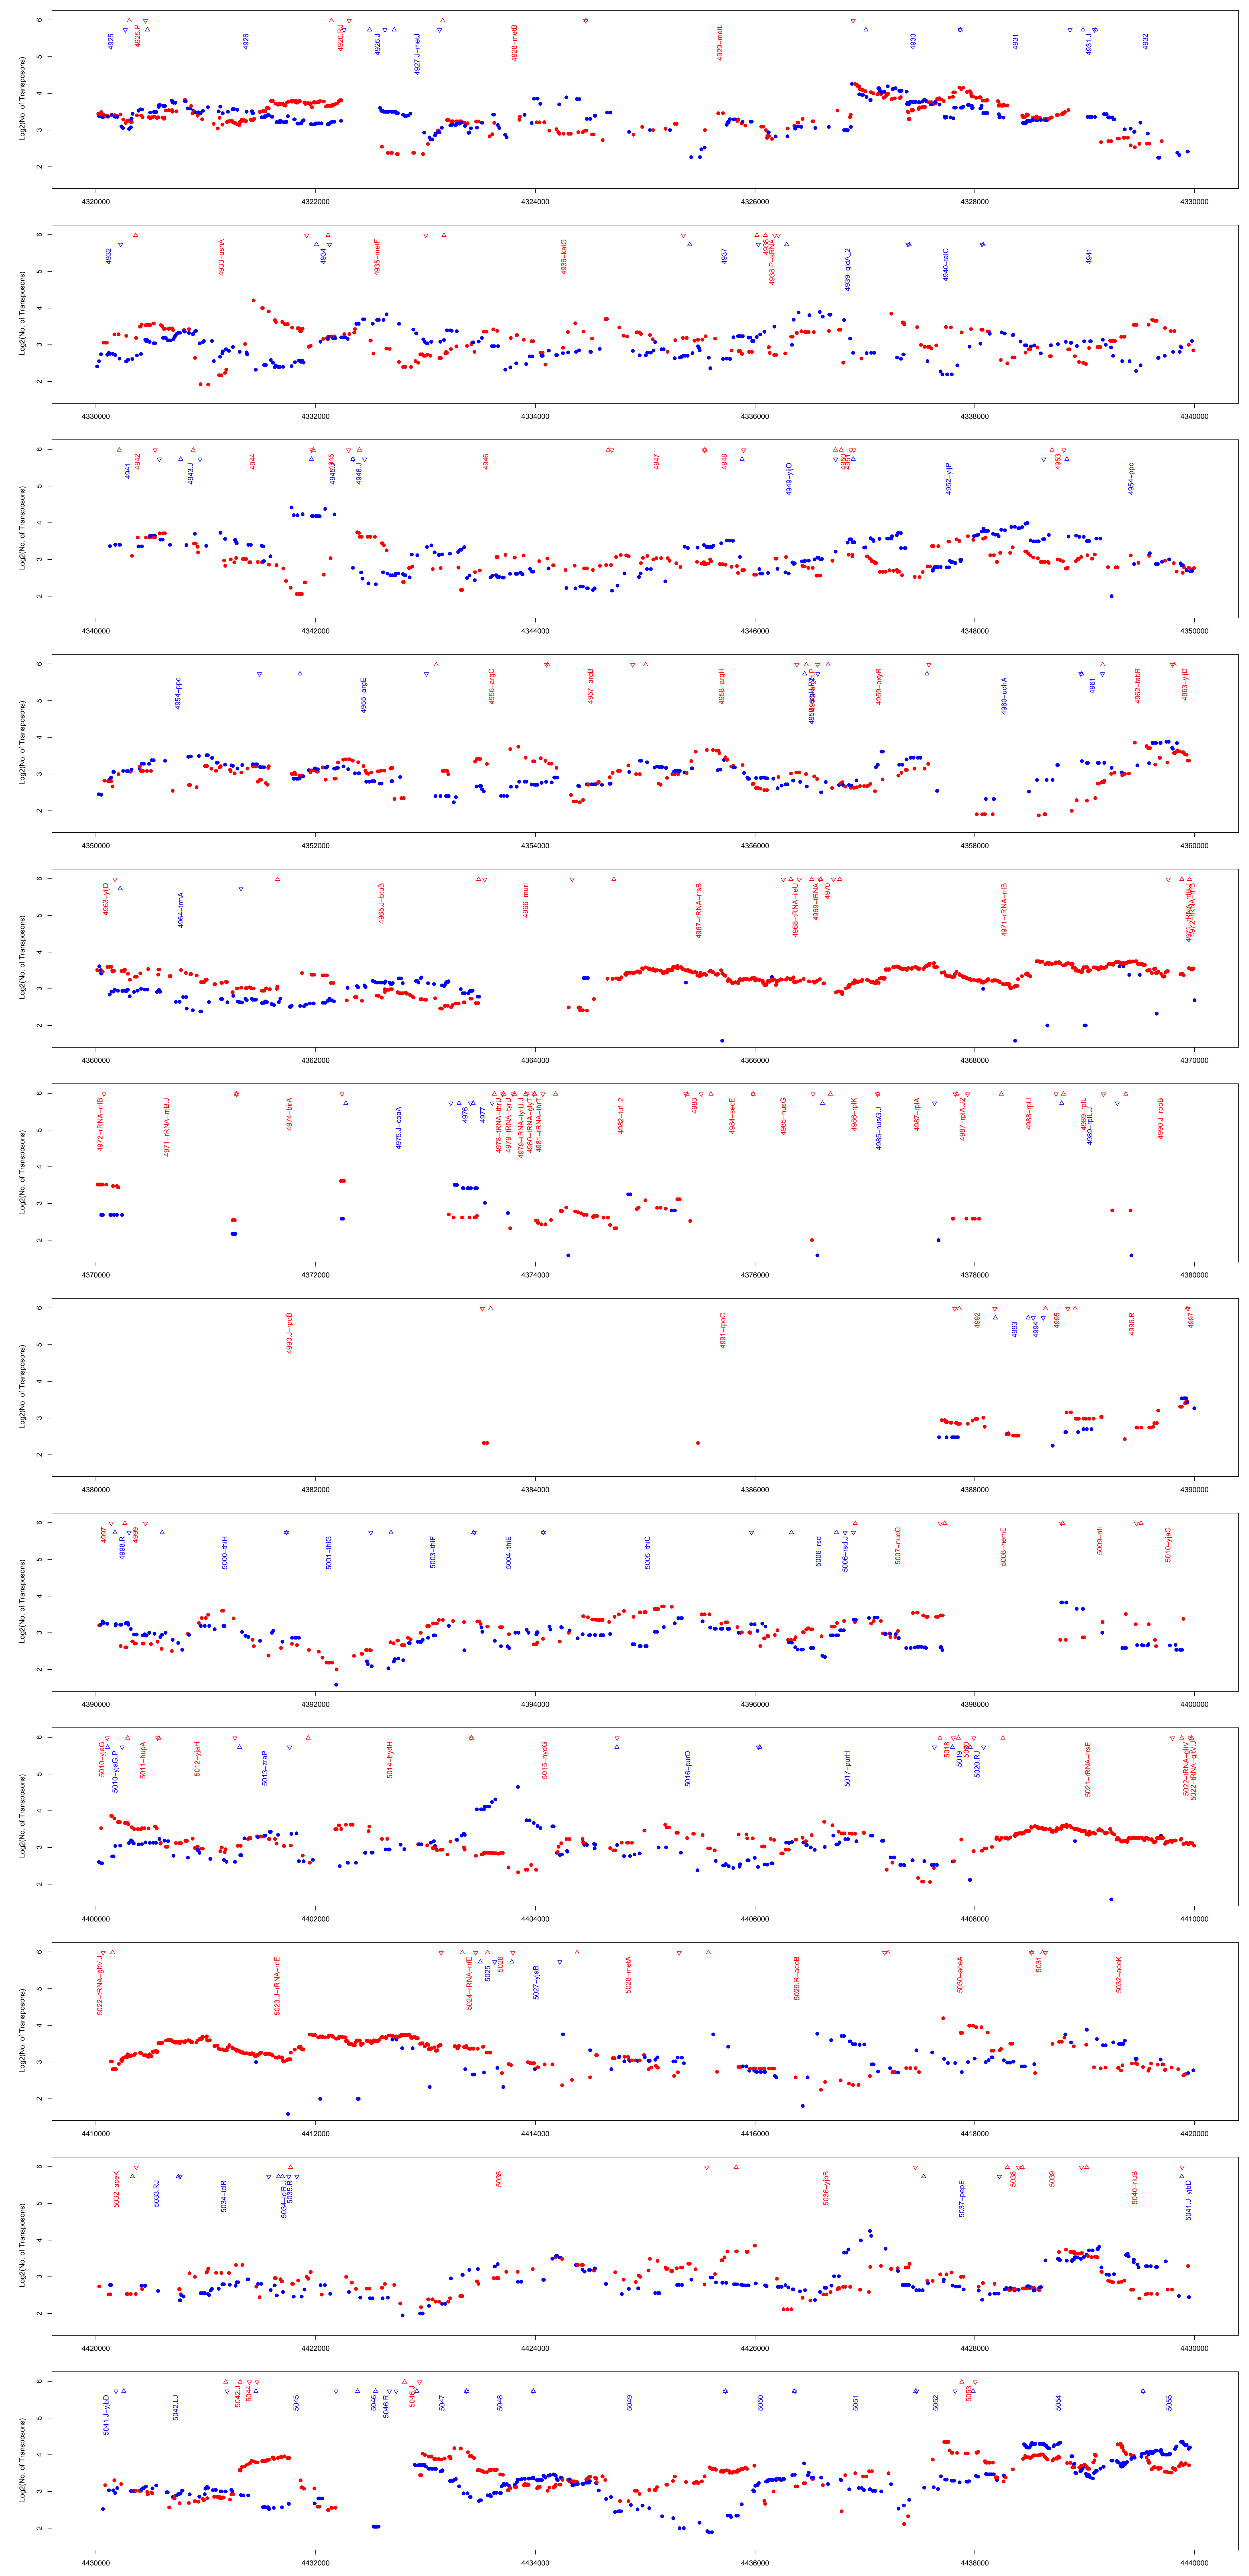

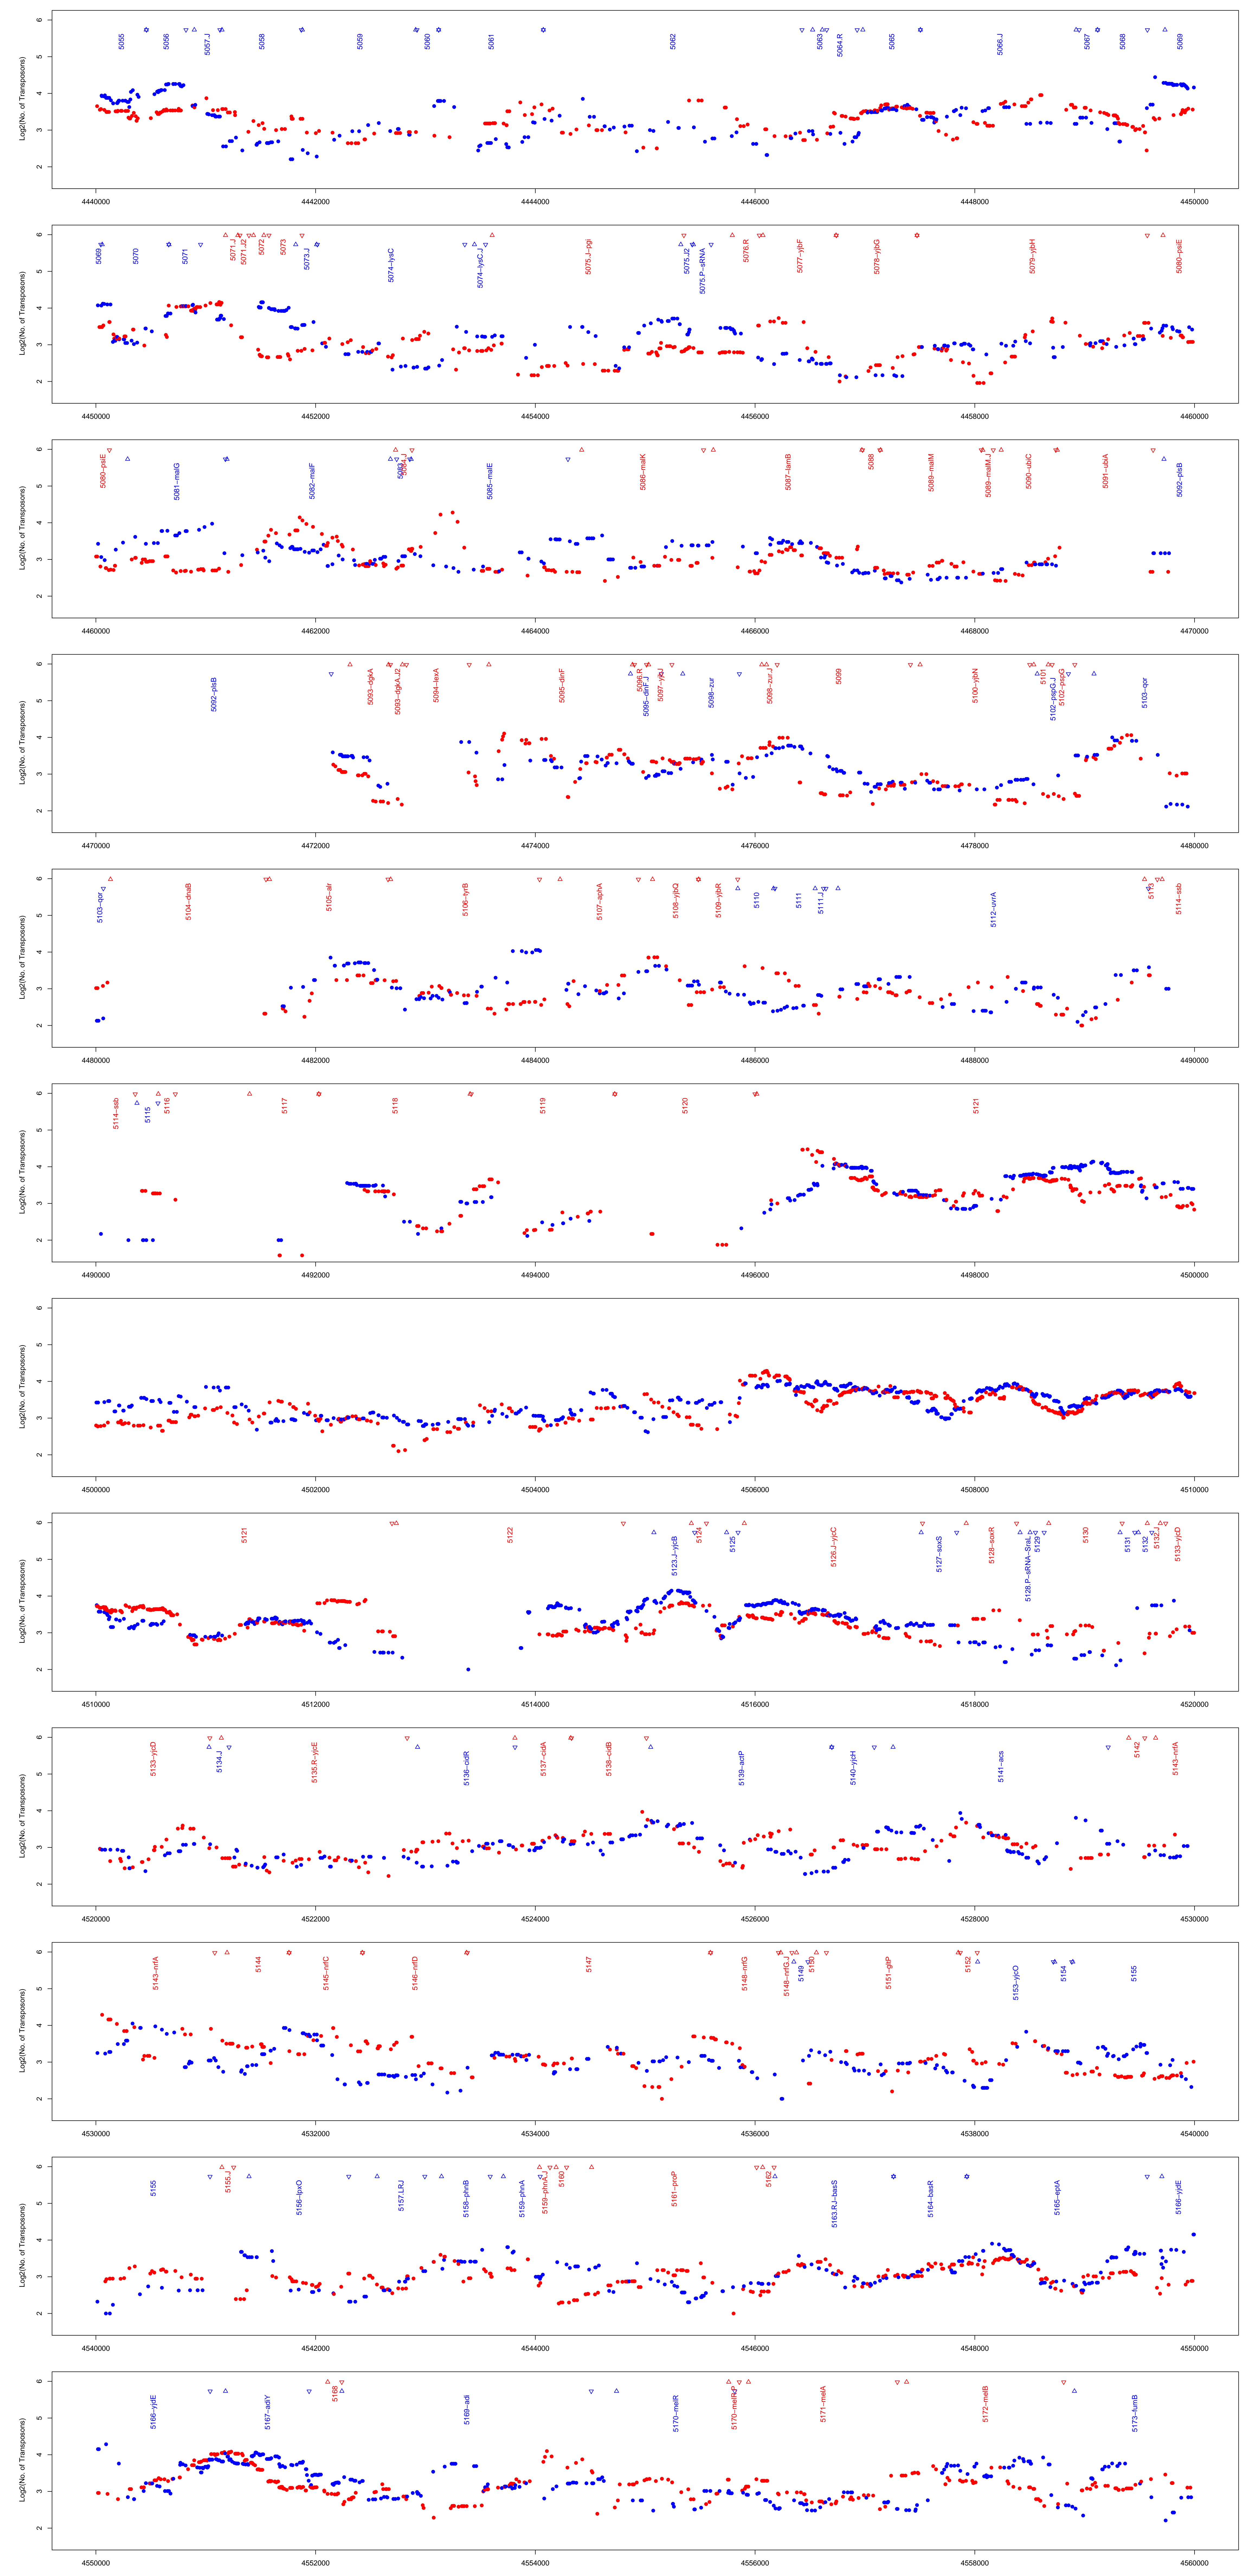

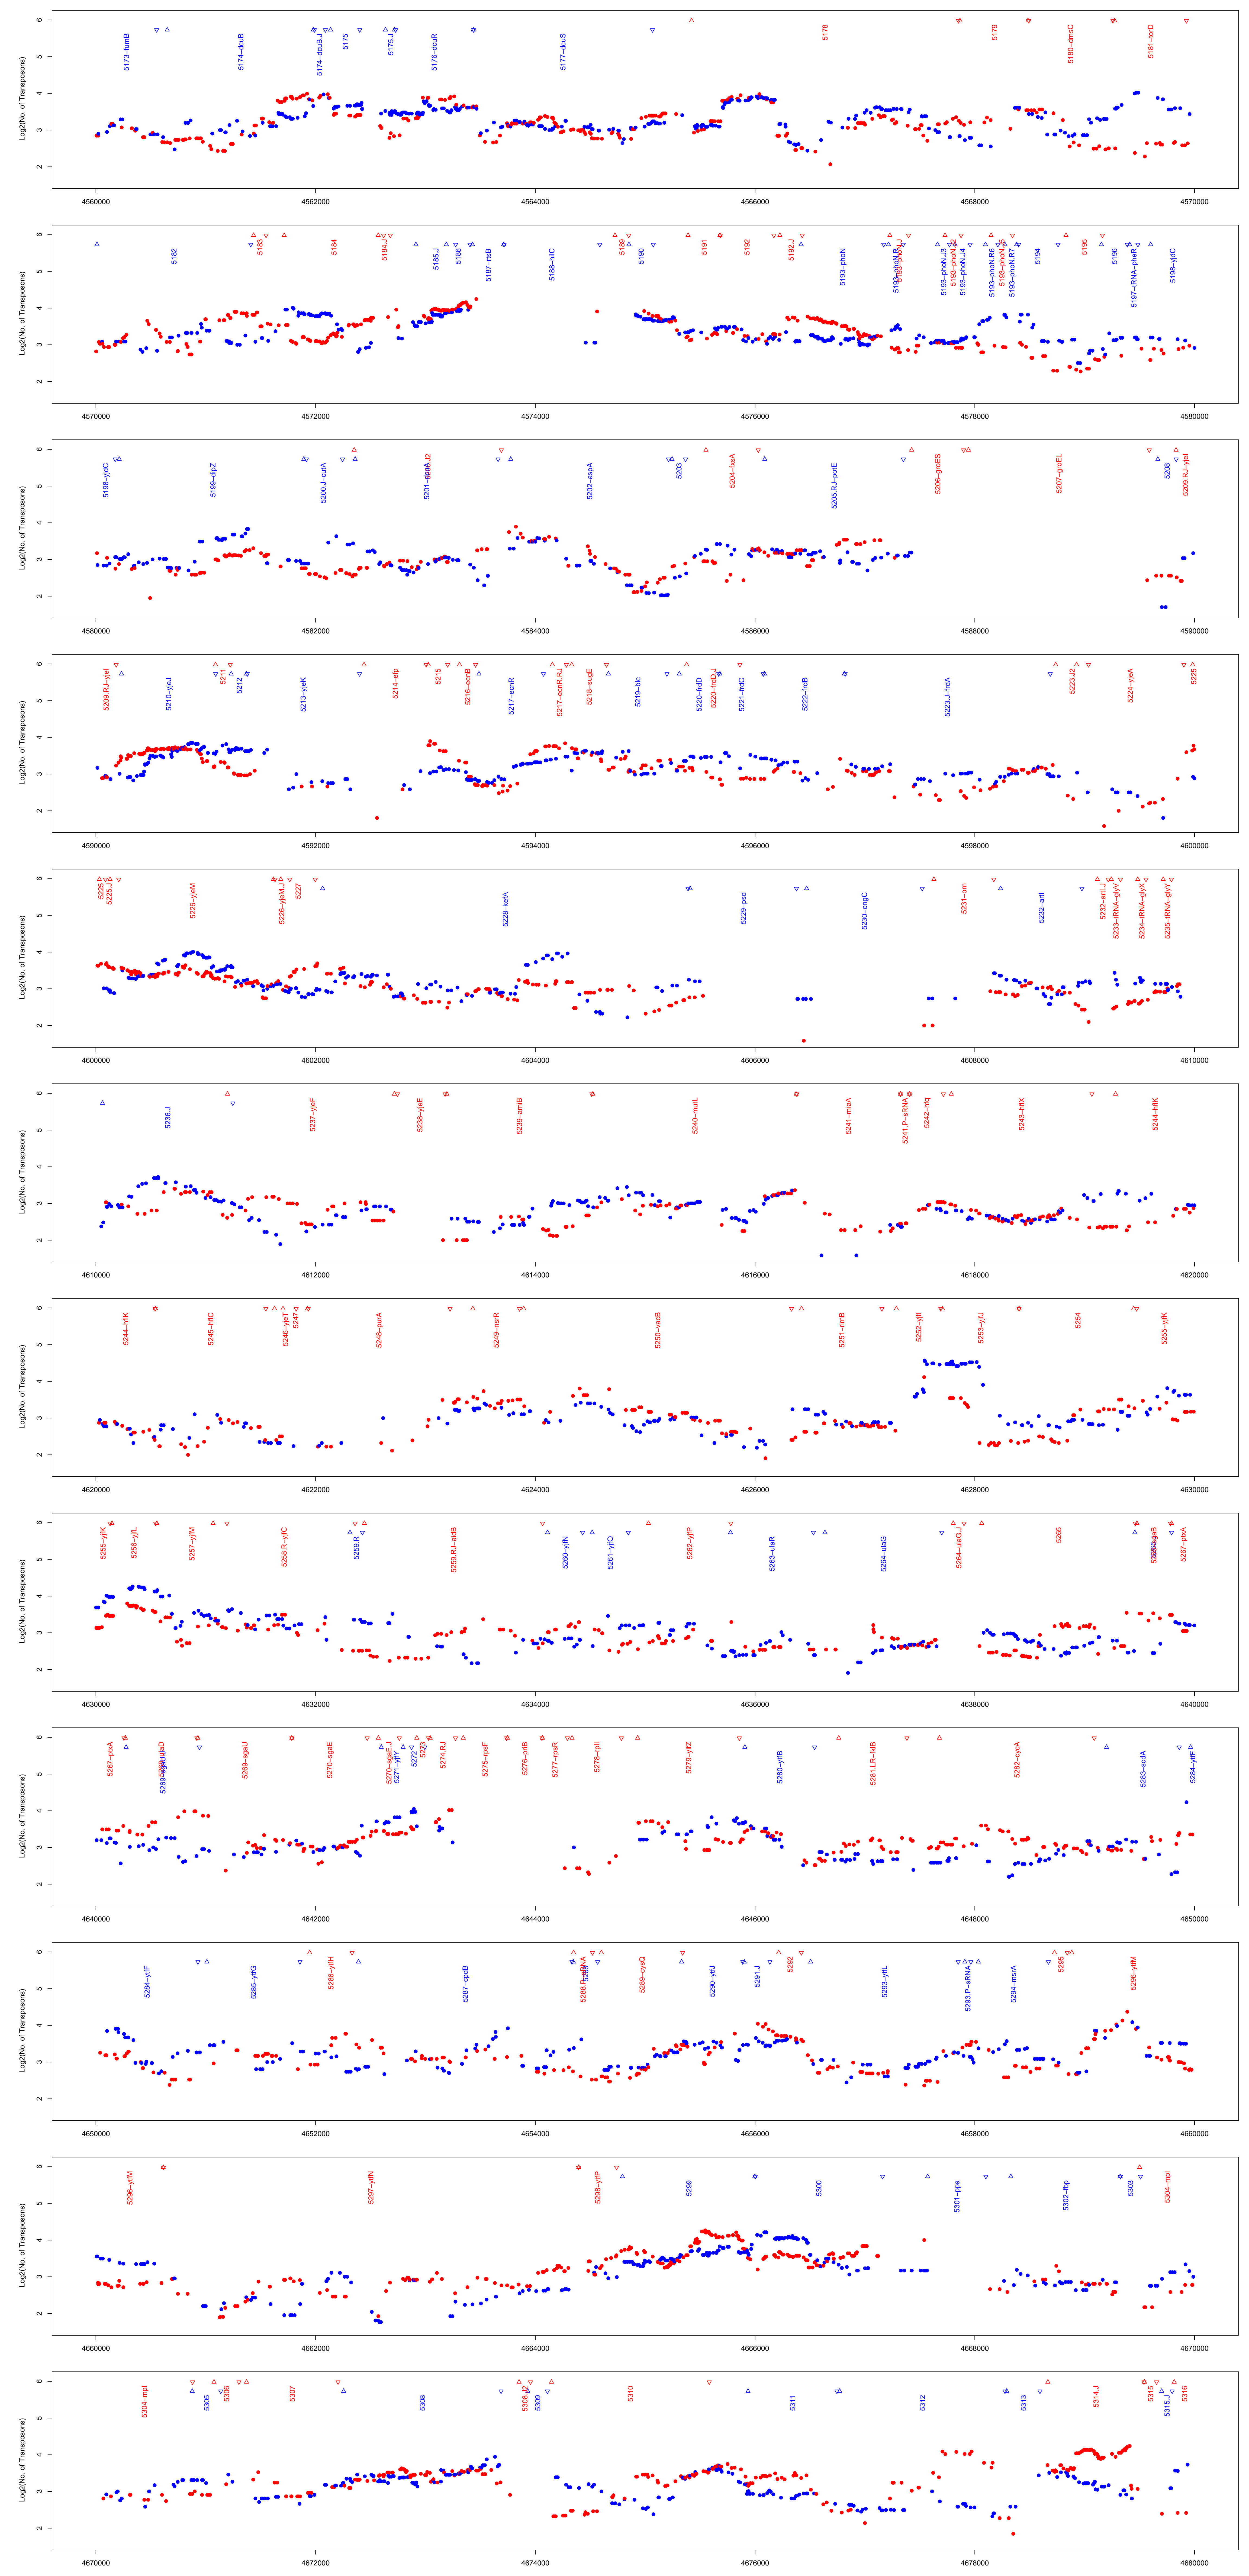

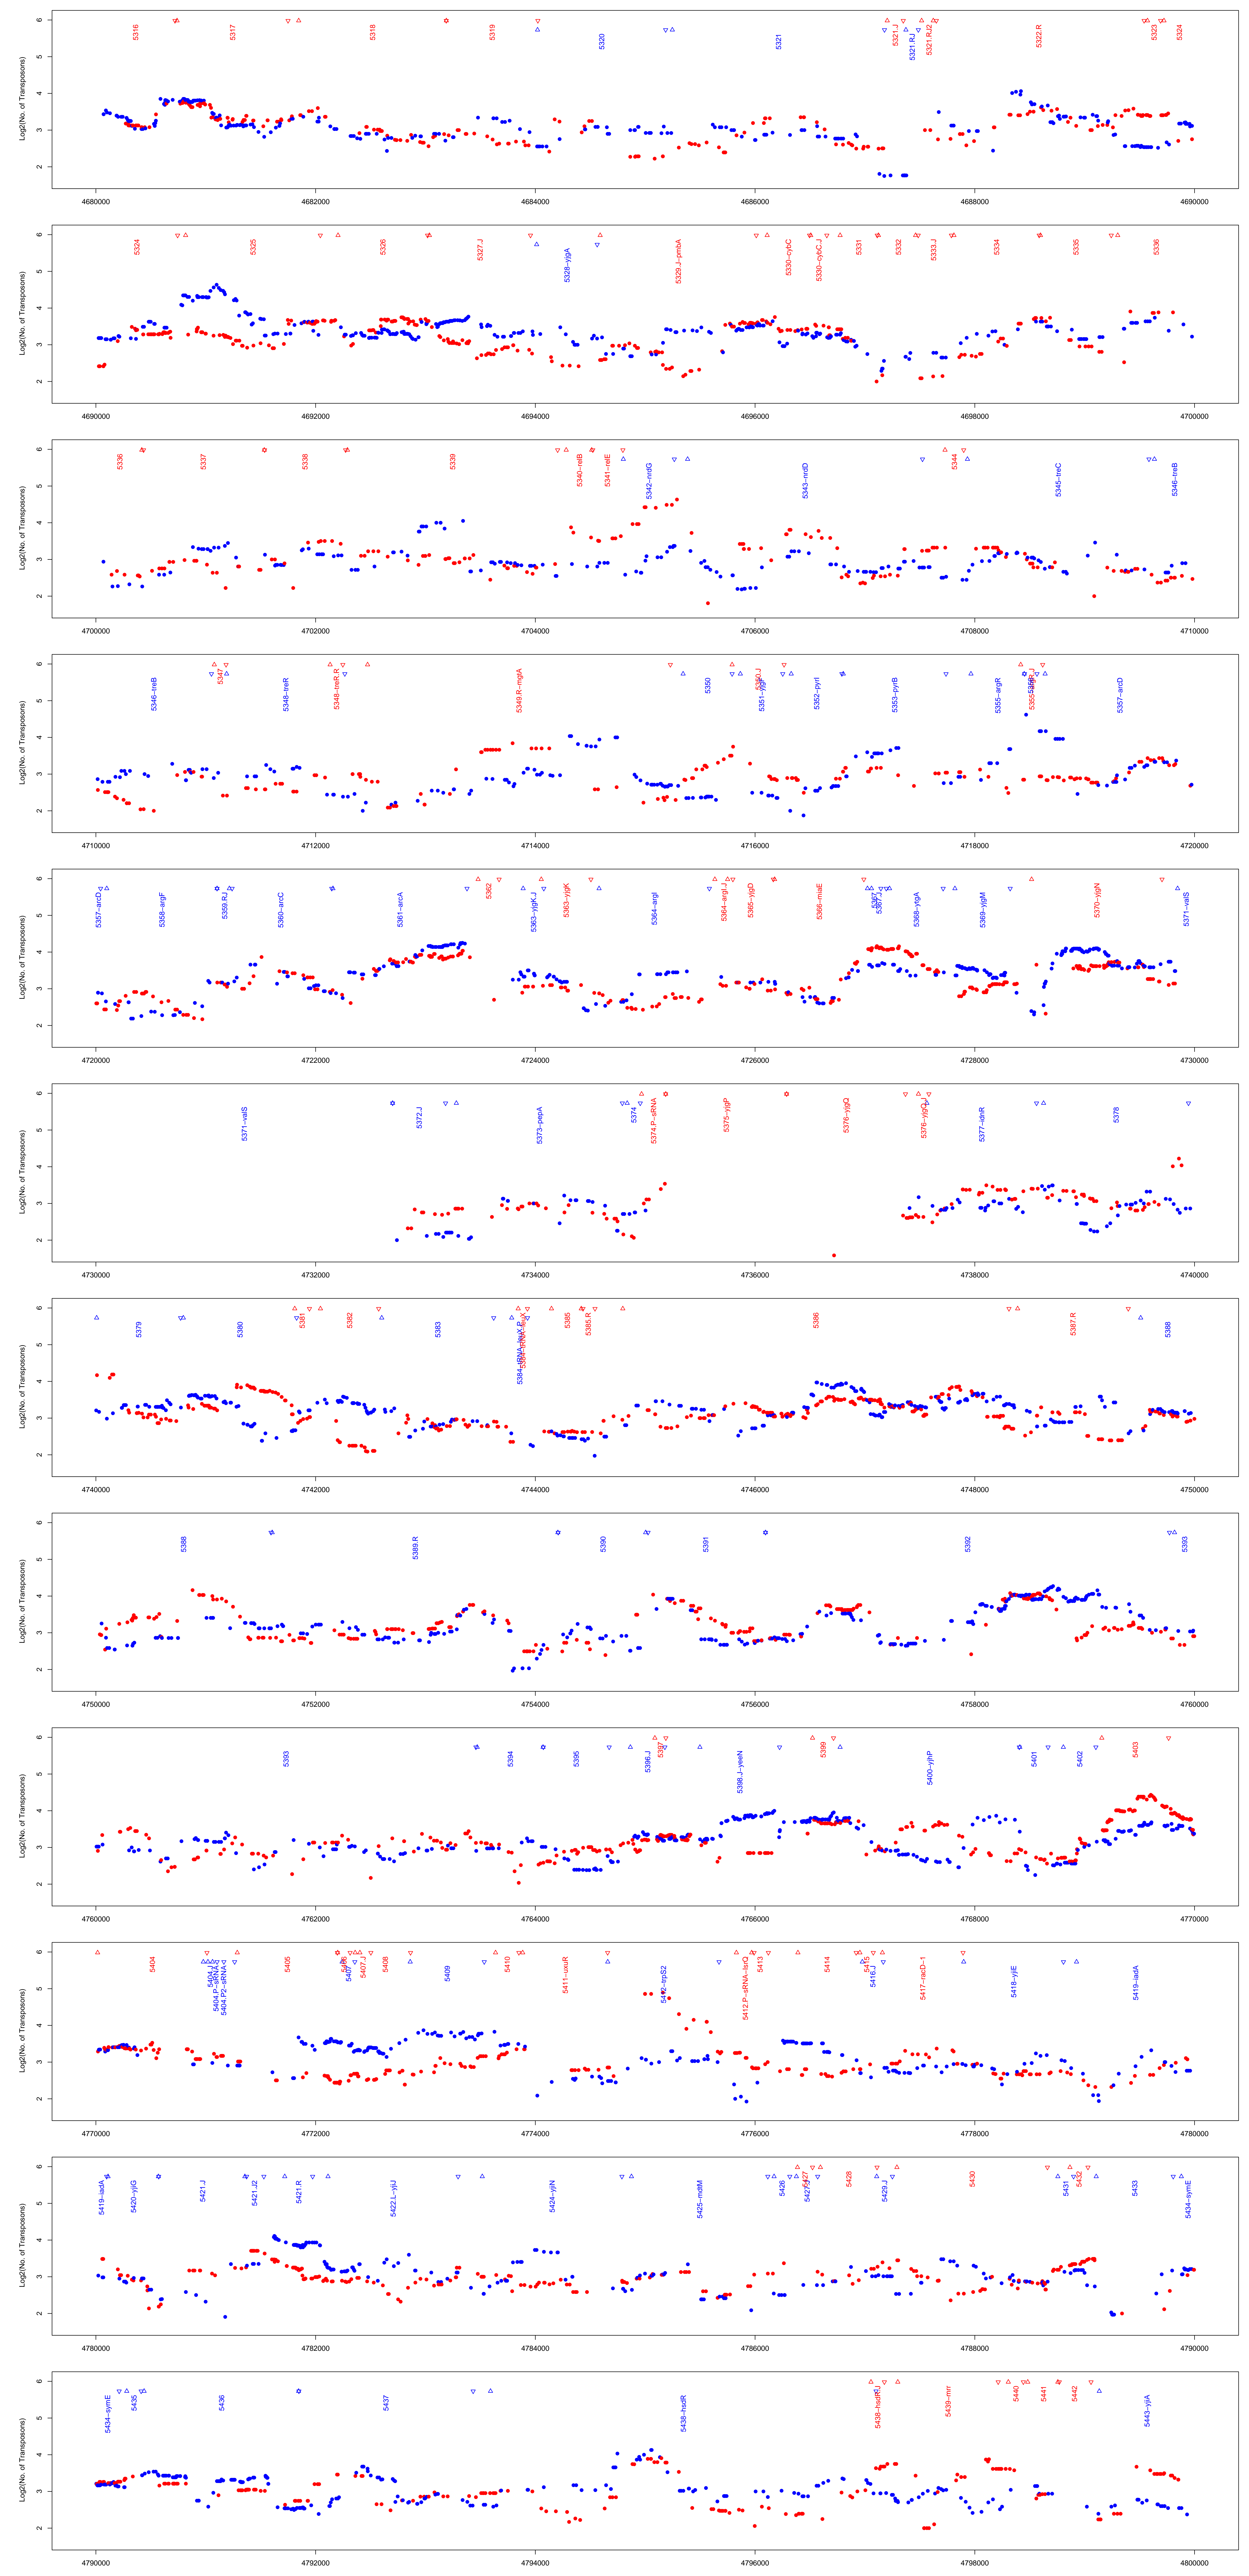



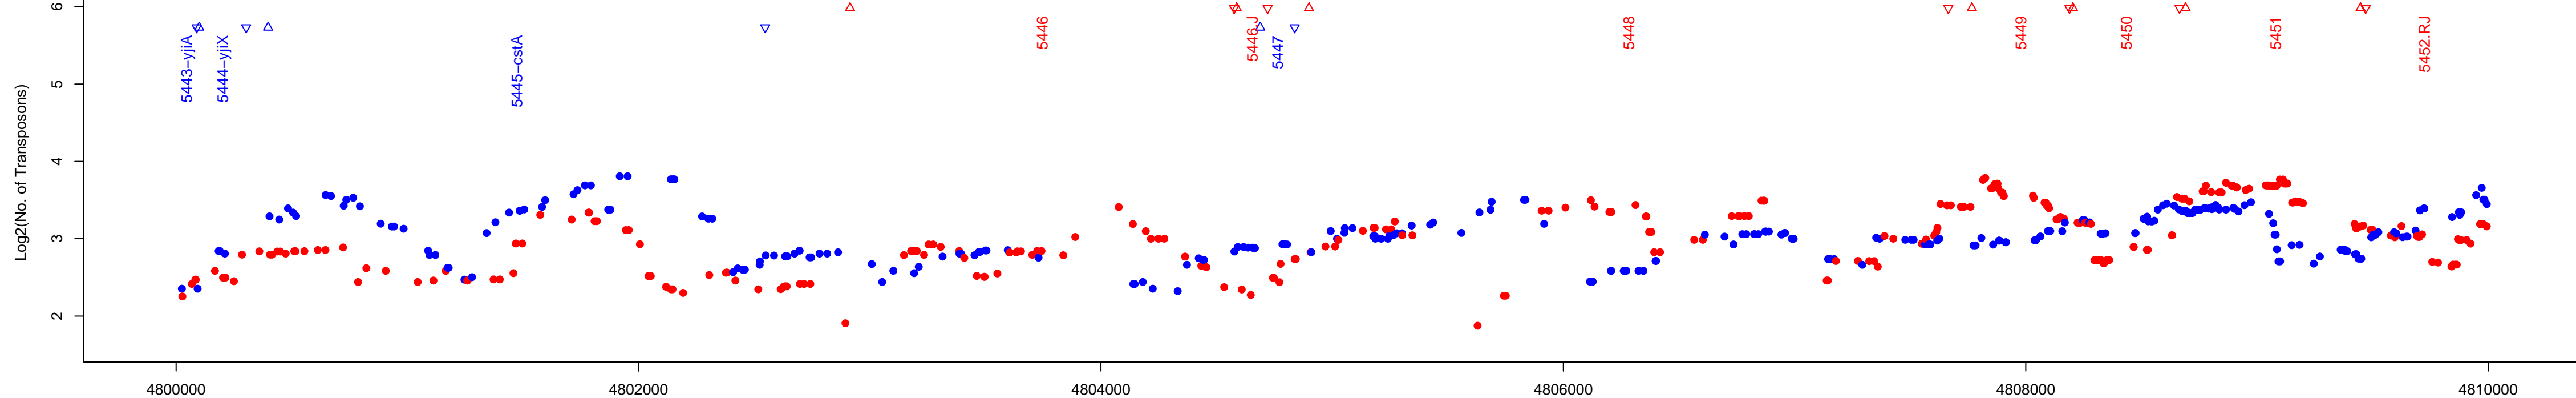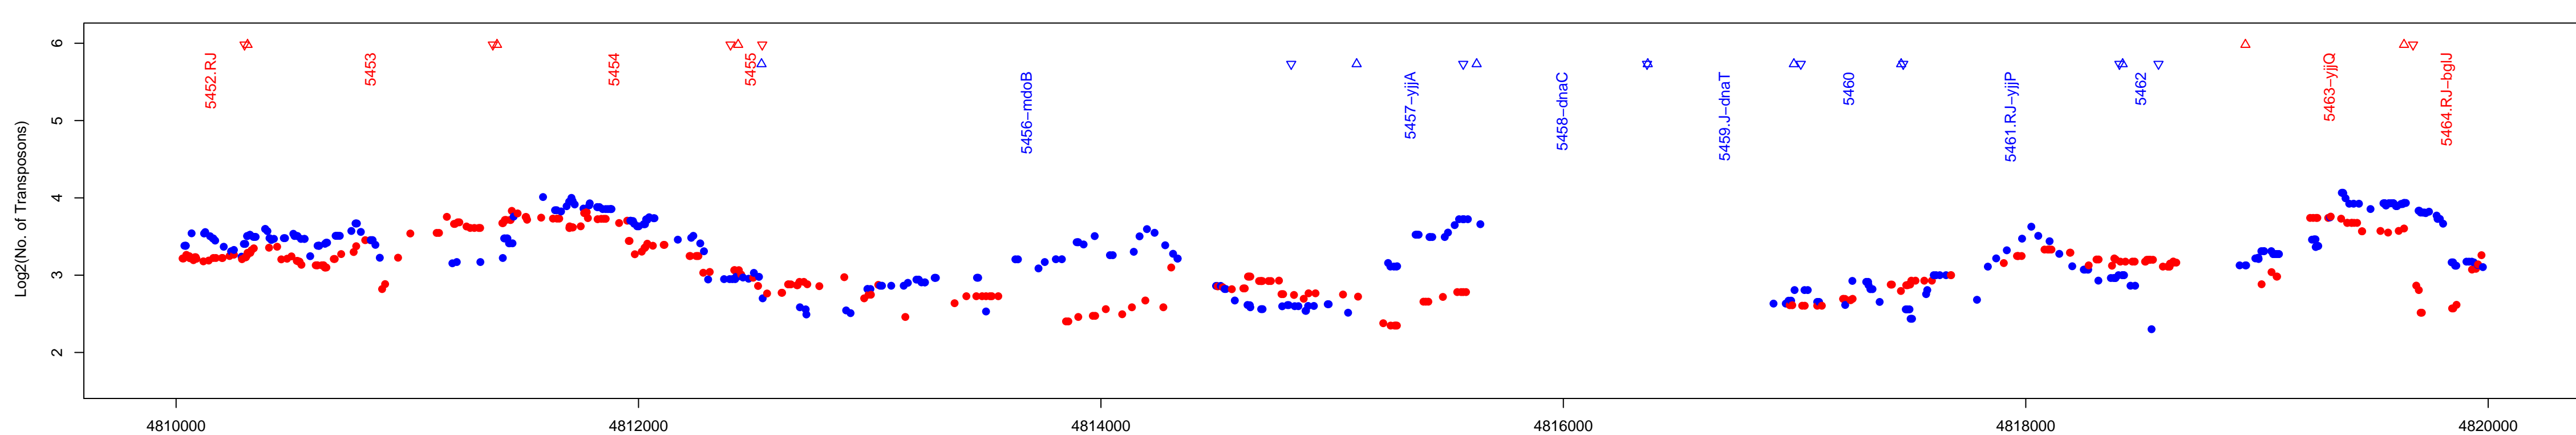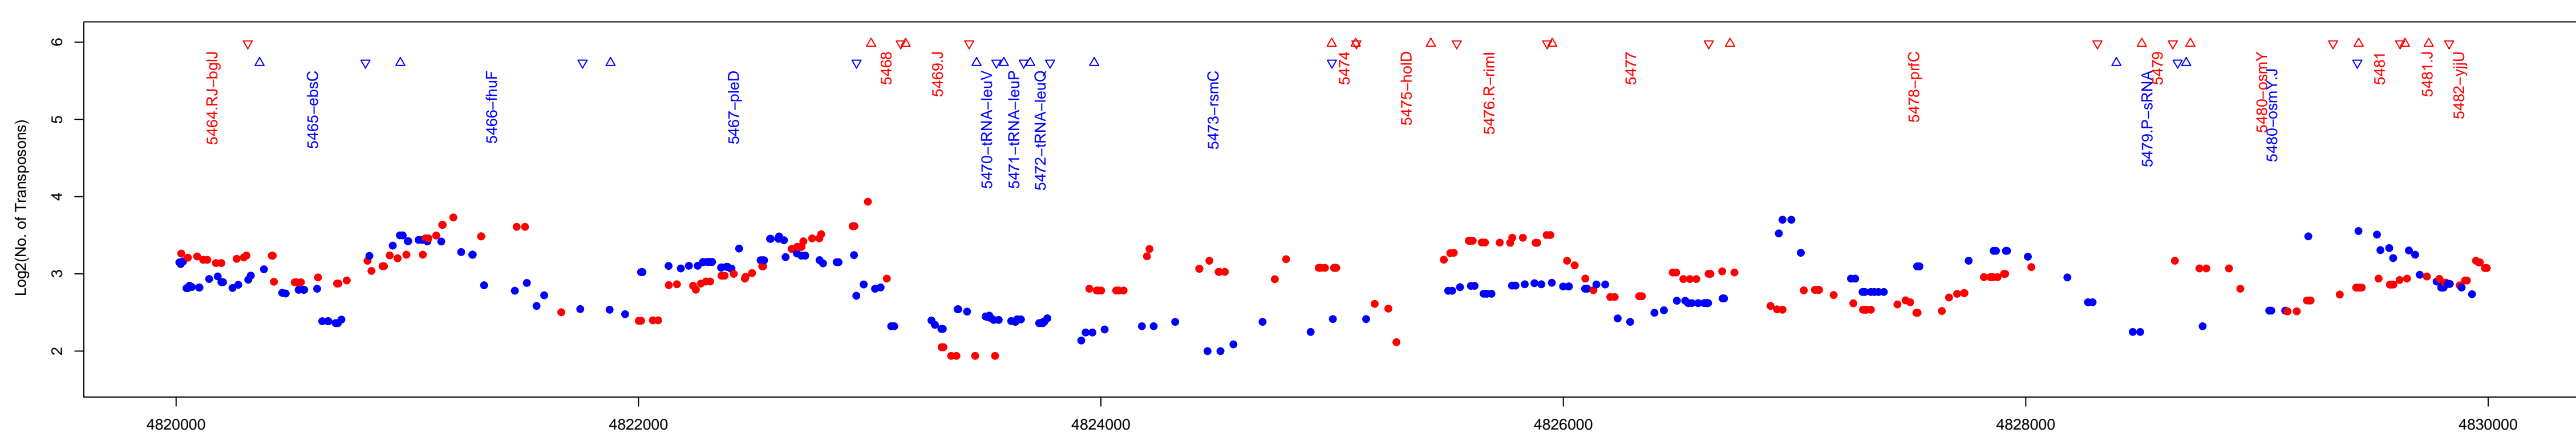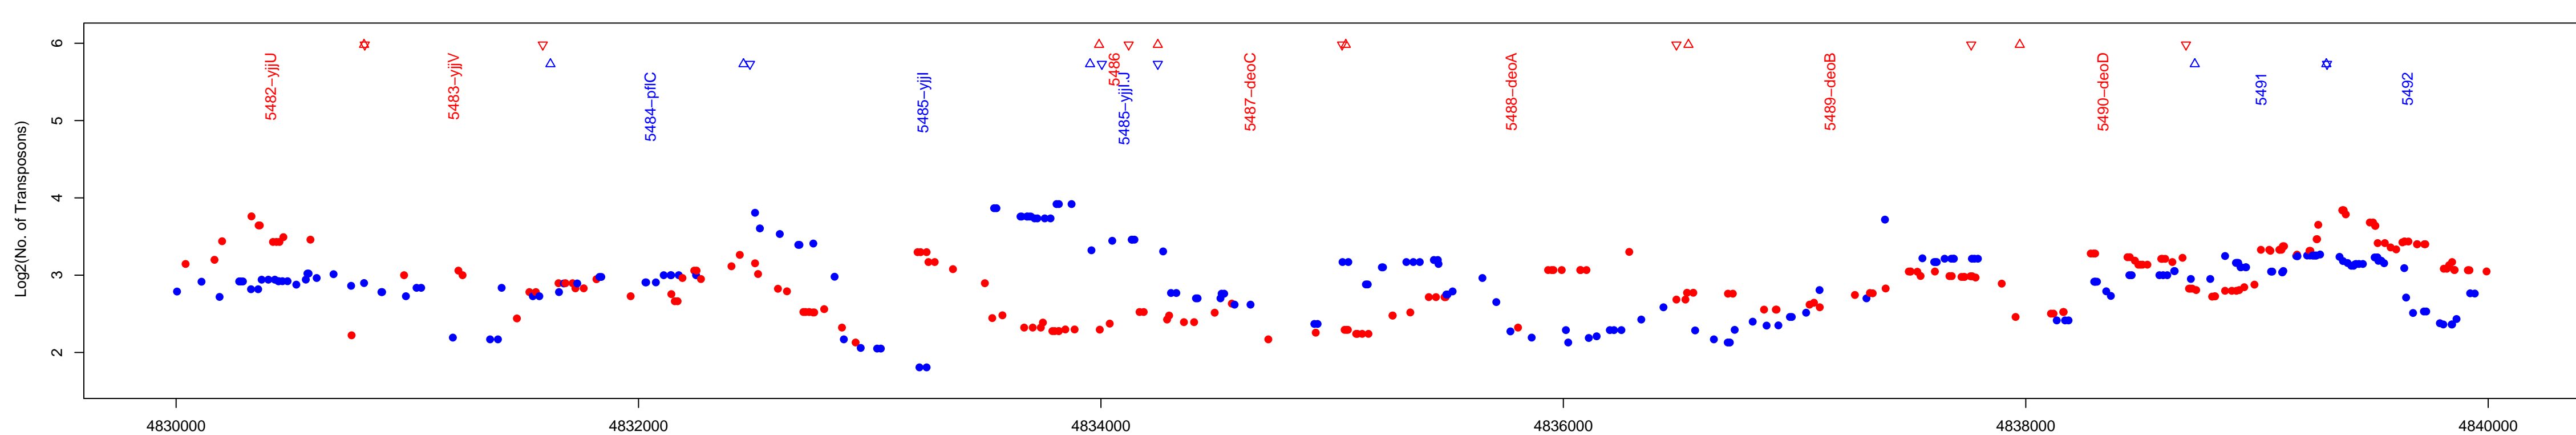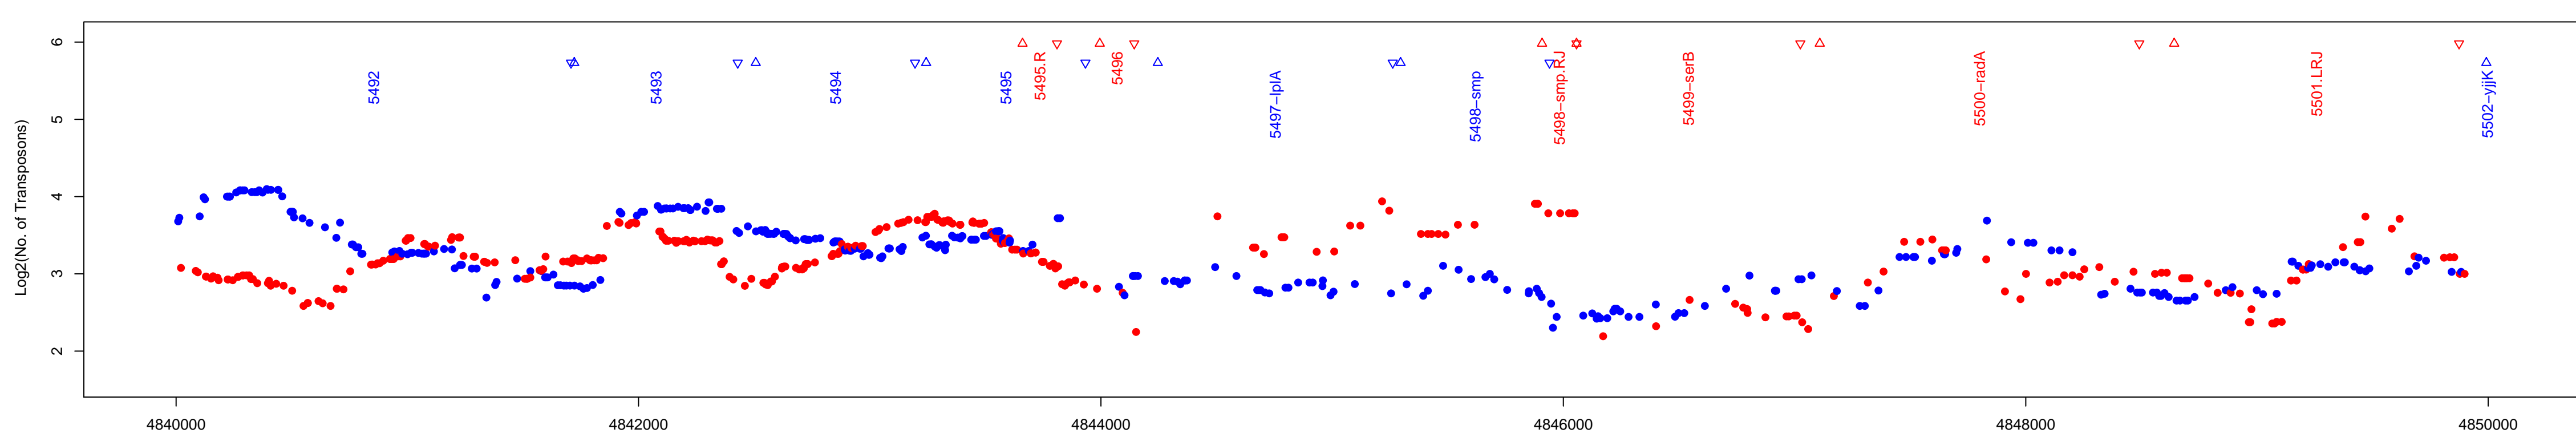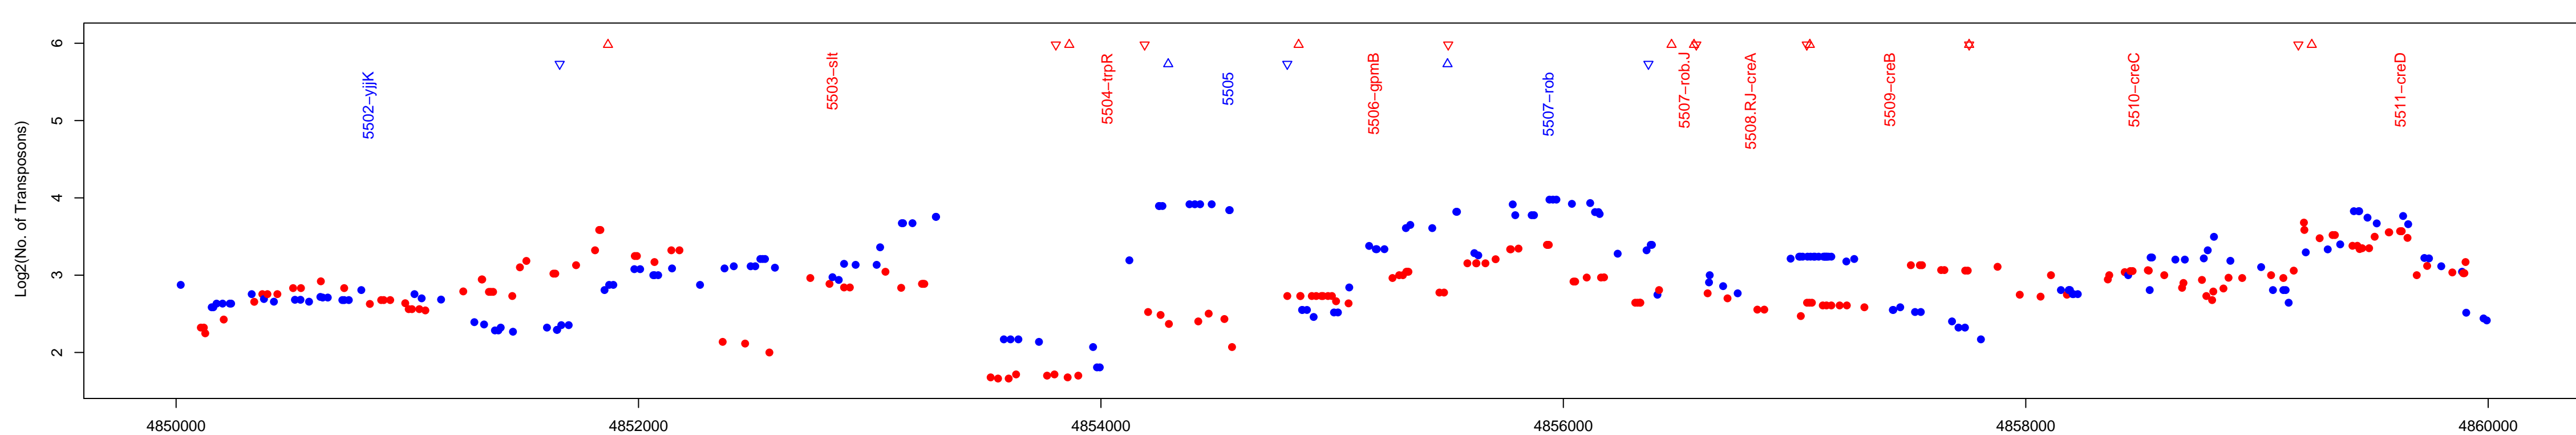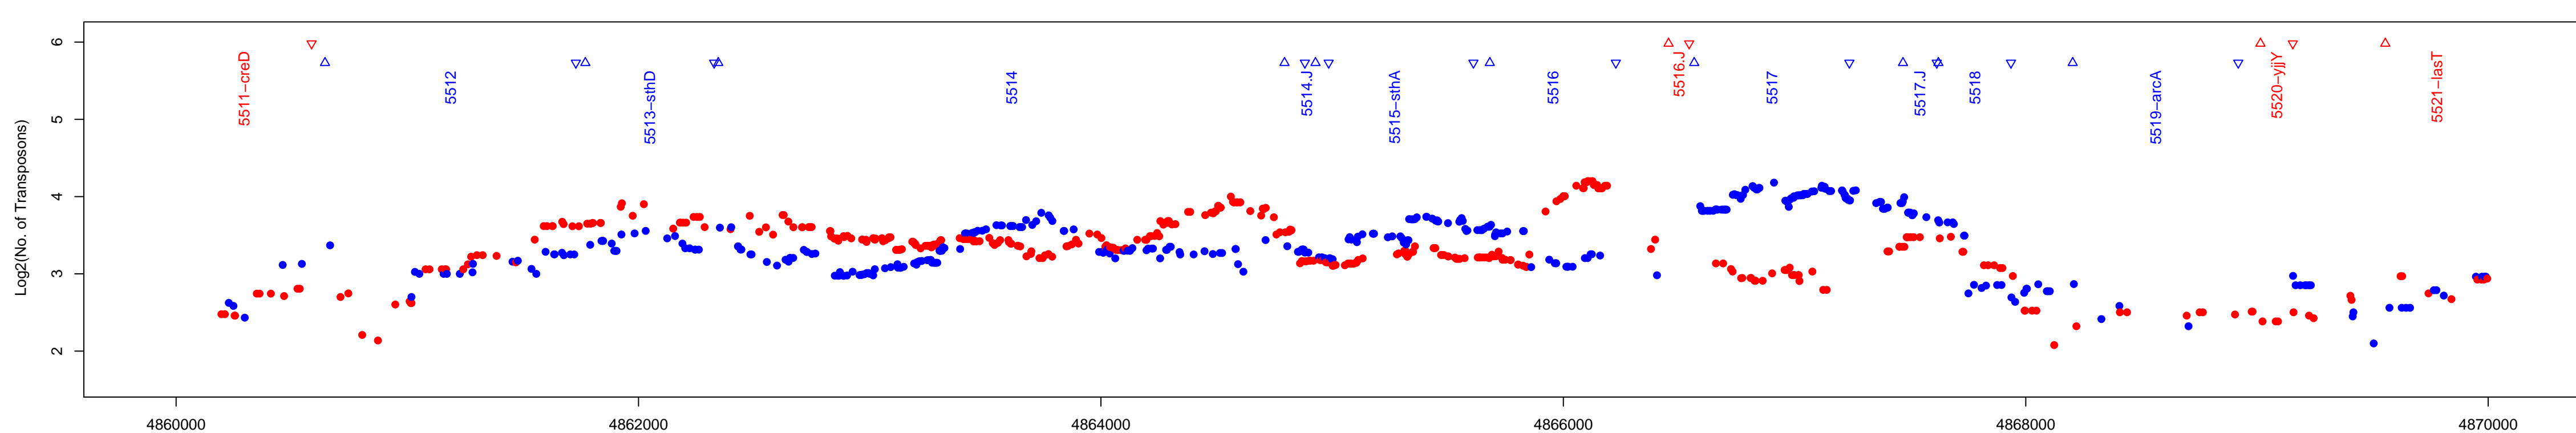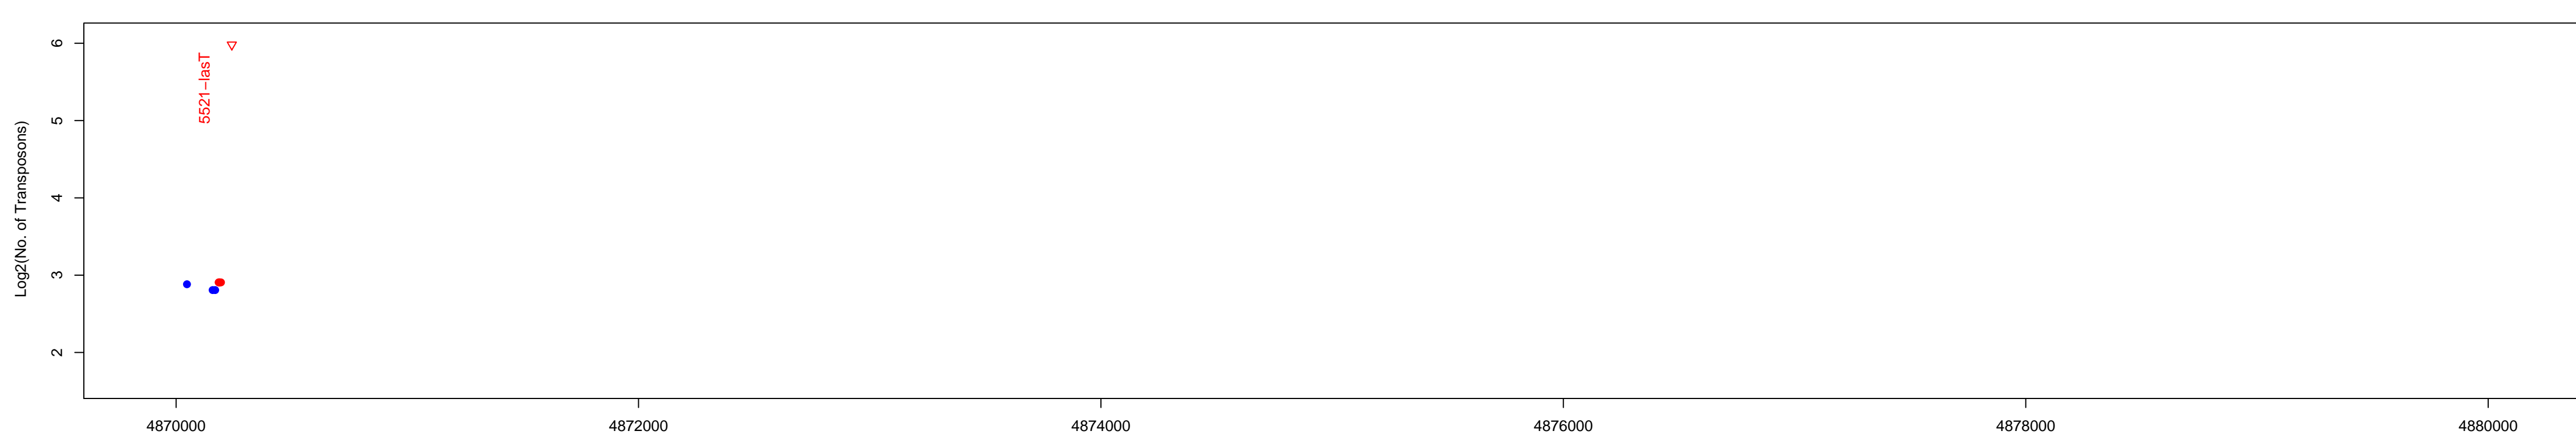

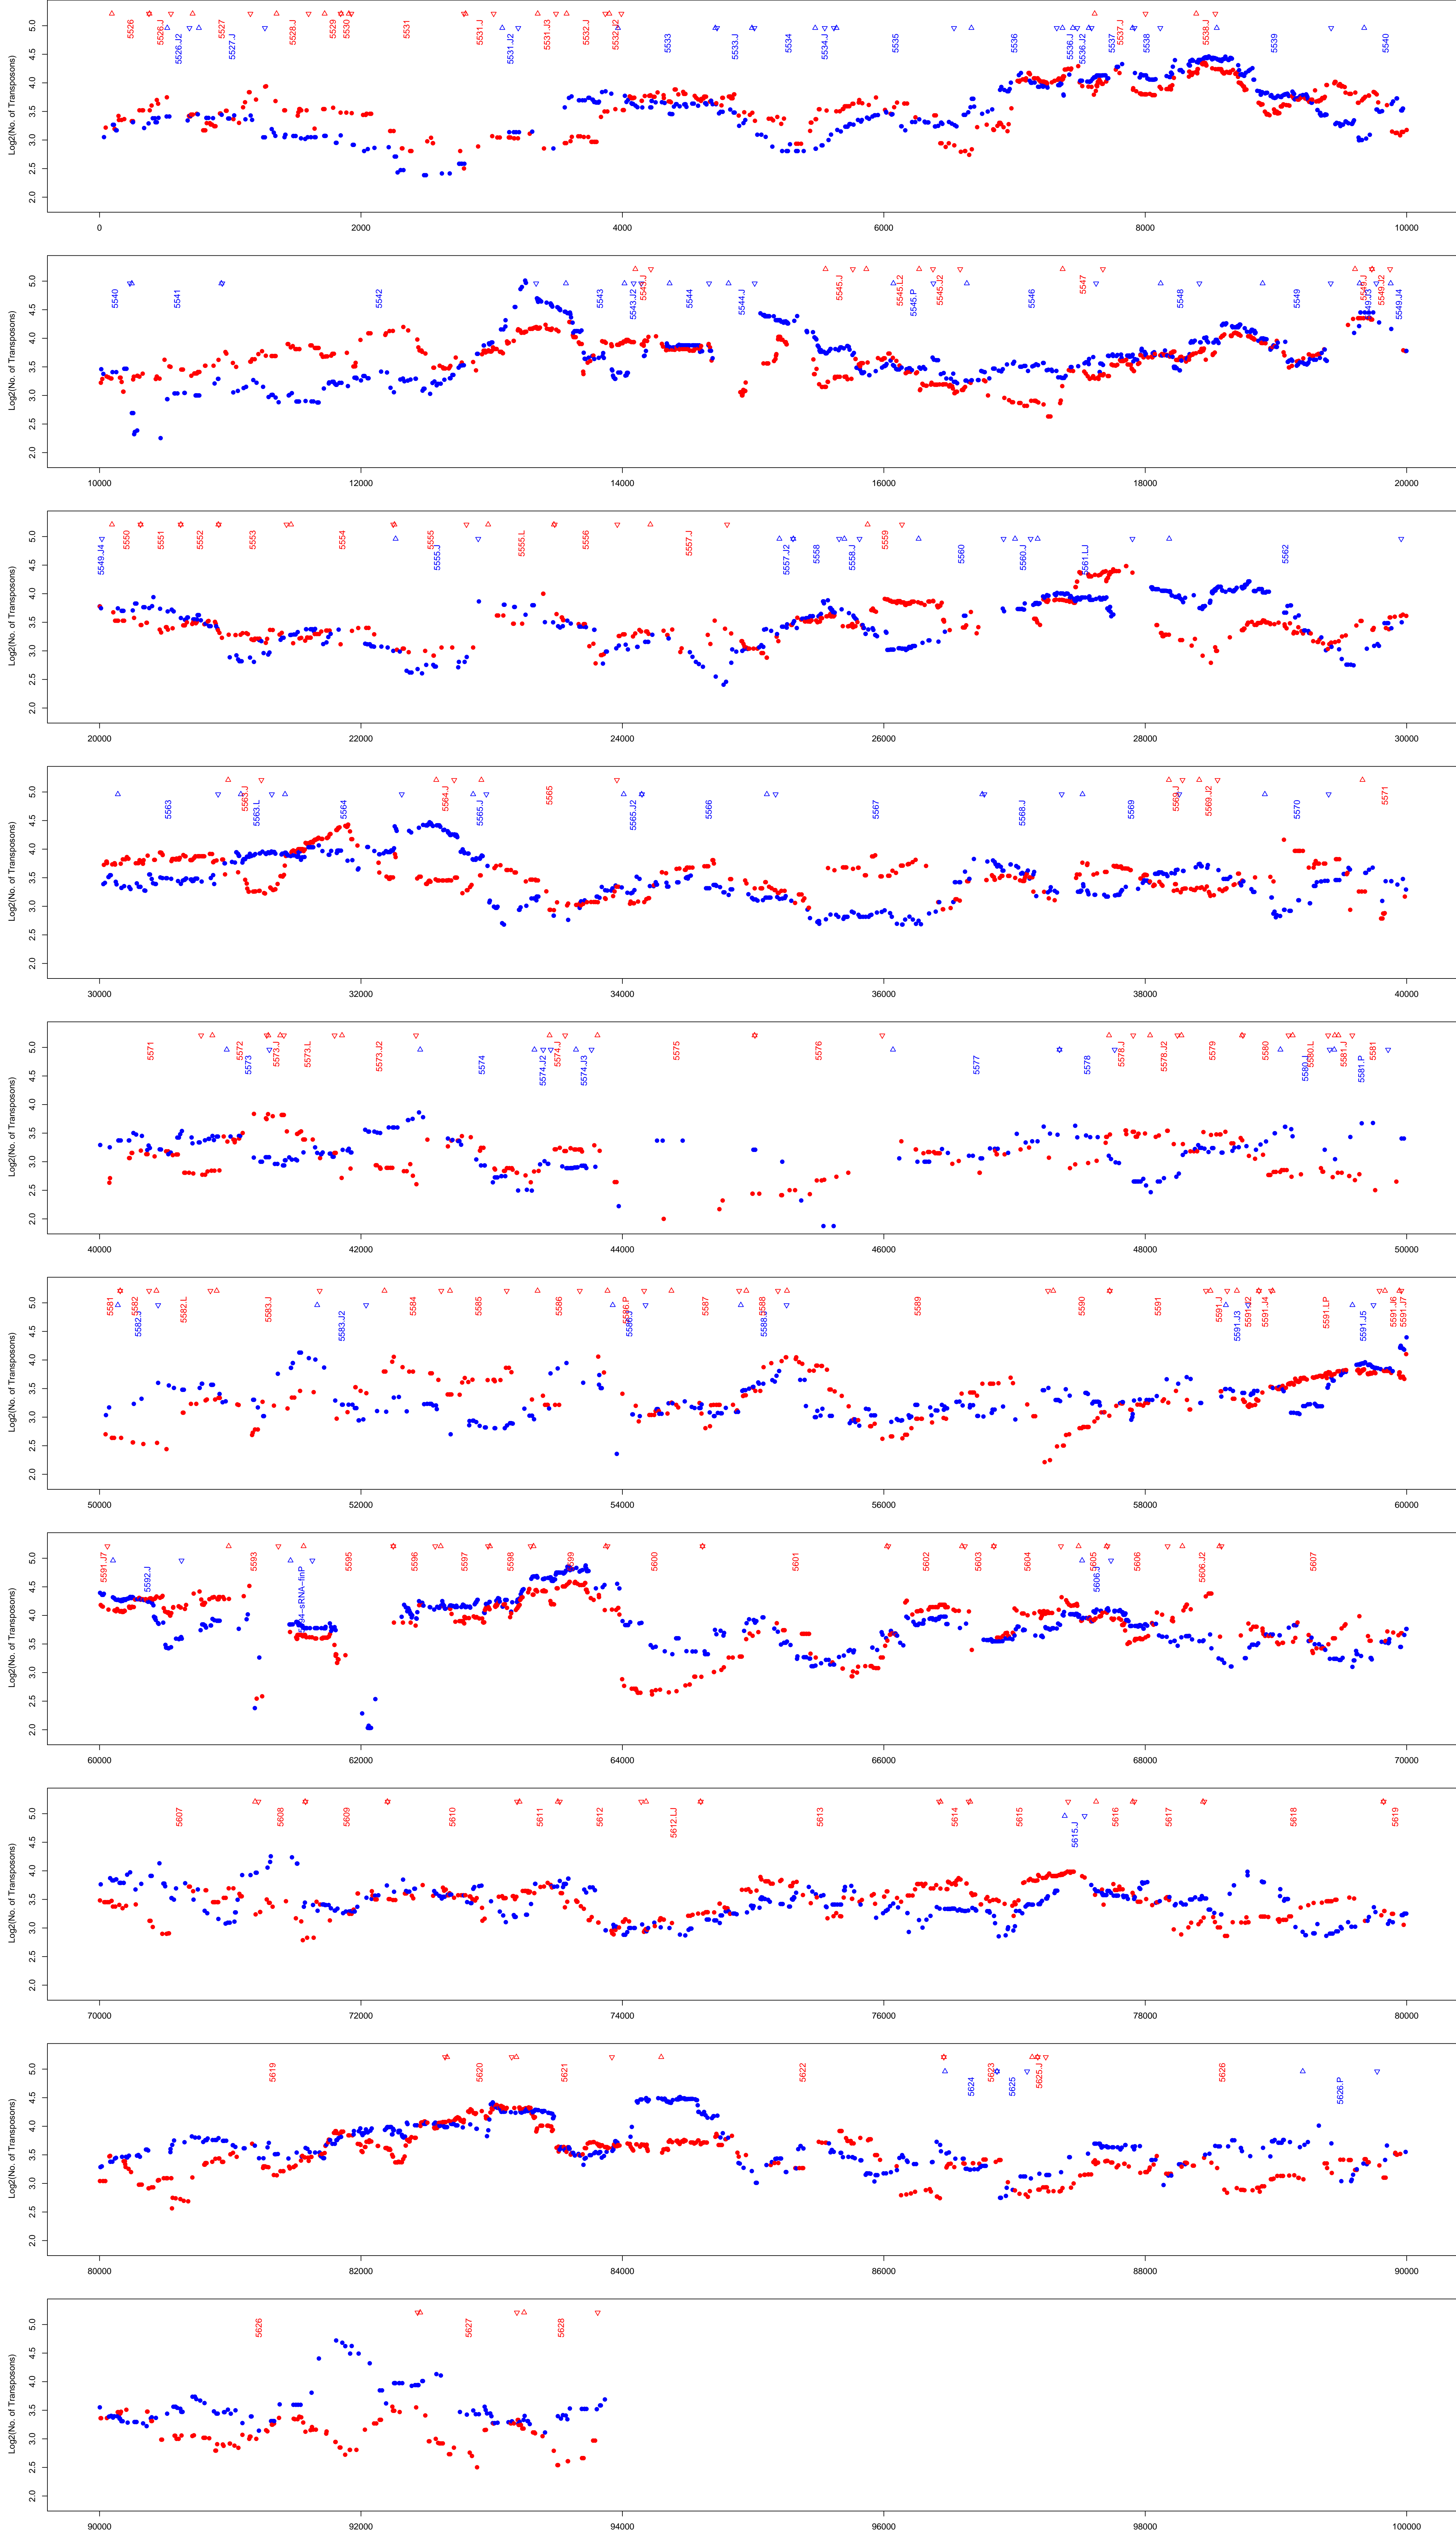

Supplement: 1471-2164-13-212-S4.pdf [file 1471-2164-13-212-S4.pdf]
